# Supplementary material for: Revisiting the role of Dcc in visual system development with a novel eye clearing method
Source: eLife. 2020 Feb 25;9:e51275. doi: 10.7554/eLife.51275 (PMC7062470; doi:10.7554/eLife.51275)
Supplement: Figure 2—source data 1. [file elife-51275-fig2-data1.xlsx]

## Sheet: Feuil1
Figure 2-Supplementary Figure1 M
	EdU/CHX10 (%)
genotype	Dccfl/fl	Dkk3-Cre;DCCfl/fl
E12	24.27	29.975
	27.465	24.75
	19.874	24.47
	33.535	24.14
	24.01	26.005
	30.445	26.615
N	6	6
Minimum	19.87	24.14
25% Percentile	22.98	24.39
Median	25.87	25.38
75% Percentile	31.22	27.46
Maximum	33.54	29.98
Mean	26.6	25.99
Std. Deviation	4.919	2.17
Std. Error of Mean	2.008	0.8858
Lower 95% CI of mean	21.44	23.72
Upper 95% CI of mean	31.76	28.27
Sum	159.6	156
