# Supplementary material for: Revisiting the role of Dcc in visual system development with a novel eye clearing method
Source: eLife. 2020 Feb 25;9:e51275. doi: 10.7554/eLife.51275 (PMC7062470; doi:10.7554/eLife.51275)
Supplement: Figure 4—source data 1. [file elife-51275-fig4-data1.xlsx]

## Sheet: Feuil1
Figure 4h
genotype	Wild type	Dkk3-Cre;DCCfl/+	Dkk3-Cre;DCCfl/fl	DCC-/-
Optic nerve volume (µm3)	0.92	0.911311	0.18061	0.11
	0.63	0.969858	0.050907	0.25
	0.84	0.990639	0.0961729	0.2
	1.12	1.00346	0.138458	0.15
	1.15		0.204235	0.15
	0.71		0.170478	0.1
	0.68			0.11
	0.81			0.25
Number of values	8	4	6	8
Minimum	0.63	0.9113	0.05091	0.1
25% Percentile	0.6875	0.9259	0.08486	0.11
Median	0.825	0.9802	0.1545	0.15
75% Percentile	1.07	1	0.1865	0.2375
Maximum	1.15	1.003	0.2042	0.25
Mean	0.8575	0.9688	0.1401	0.165
Std. Deviation	0.1949	0.04076	0.05756	0.06141
Std. Error of Mean	0.06891	0.02038	0.0235	0.02171
Lower 95% CI of mean	0.6945	0.904	0.07974	0.1137
Upper 95% CI of mean	1.02	1.034	0.2005	0.2163
Sum	6.86	3.875	0.8409	1.32
