# Supplementary material for: Revisiting the role of Dcc in visual system development with a novel eye clearing method
Source: eLife. 2020 Feb 25;9:e51275. doi: 10.7554/eLife.51275 (PMC7062470; doi:10.7554/eLife.51275)
Supplement: Figure 4—source data 2. [file elife-51275-fig4-data2.xlsx]

## Sheet: Feuil1
Figure 4-Supplementary Figure 1H
genotype	Wild type	Dkk3-Cre;DCCfl/fl	Ntn1-/-	Dkk3-Cre;Ntn1fl/fl
Optic nerve volume (µm3)	0.92	0.18061	0.378948	0.71
	0.63	0.050907	0.328401	0.58
	0.84	0.0961729	0.455225	0.4
	1.12	0.138458	0.908645	0.25
	1.15	0.204235	0.31938	0.22
	0.71	0.170478	0.222374
	0.68		0.543648
	0.81		0.143568
			0.328129
Number of values	8	4	9	5
Minimum	0.63	0.9113	0.1436	0.22
25% Percentile	0.6875	0.9259	0.2709	0.235
Median	0.825	0.9802	0.3284	0.4
75% Percentile	1.07	1	0.4994	0.645
Maximum	1.15	1.003	0.9086	0.71
Mean	0.8575	0.9688	0.4031	0.432
Std. Deviation	0.1949	0.04076	0.2227	0.2111
Std. Error of Mean	0.06891	0.02038	0.07424	0.09441
Lower 95% CI of mean	0.6945	0.904	0.2319	0.1699
Upper 95% CI of mean	1.02	1.034	0.5743	0.6941
Sum	6.86	3.875	3.628	2.16
