# Supplementary material for: Revisiting the role of Dcc in visual system development with a novel eye clearing method
Source: eLife. 2020 Feb 25;9:e51275. doi: 10.7554/eLife.51275 (PMC7062470; doi:10.7554/eLife.51275)
Supplement: Figure 5—source data 1. [file elife-51275-fig5-data1.xlsx]

## Sheet: Feuil1
Figure 5F				Figure 5G
optic nerve volume (µm3)				optic tract volume (µm3)
genotype	Dccfl/fl	Dkk3-Cre;DCCfl/fl		genotype	Dccfl/fl	Dkk3-Cre;DCCfl/fl
P15	33524400	9729660		P15	60146300	22206000
	27784200	1766650			46575300	8162410
	25446800	9340740			66172900	18502000
	34680900	4598520			62357500	20180000
	34717400				63239700
N	5	4		N	5	4
Mean	31230740	6358892.5		Mean	59698340	17262602.5
SEM	1932018.09090909	1924428.28241435		SEM	3420139.88567719	3126472.94241817
SD	4320123.78503209	3848856.5648287		SD	7647665.27693256	6252945.88483634
optic nerve volume (µm3)				optic tract volume (µm3)
P30	49851600	12476400		P30	190606000	49650900
	49471800	3986140			203031008	15649300
	62968600	14969100			163699008	57210500
	50912200	7259130			167055008	51662400
	52690300				154568000	63923300
					202454000
N	5	4			218600000
Mean	53178900	9672692.5
SEM	2510262.94080919	2484533.34700025		N	7	5
SD	5613118.57704788	4969066.69400049		Mean	185716146.285714	47619280
				SEM	9113592.88964305	8367695.29084323
				SD	24112300.336282	18710735.4853303
Figure 5J						Figure 5O
	Superior Colliculus volume (µm3)					Lateral Geniculate Nucleus volume (µm3)
	Dccfl/fl		Dkk3-Cre;DCCfl/fl				Dccfl/fl		Dkk3-Cre;DCCfl/fl
P30	contralateral	ipsilateral	contralateral	ipsilateral		P30	contralateral	ipsilateral	contralateral	ipsilateral
	433584000	21778100	119094000	17481200			111010000	52043900	124279000	48733100
	444988992	19727900	107354000	12728810			128507000	75029000	136934000	65656200
	556963008	24198300	202860000	43698000			177432000	53863200	107715000	33855200
	538076992	25625000	139871008	17702900			138488000	71147504	150658000	49672400
	510302016	21756900	358897984	76224704			154990000	73072704
							146748992	64628900
Superior Colliculus (% ipsilateral volume)
	Dccfl/fl	Dkk3-Cre;DCCfl/fl				Lateral Geniculate Nucleus (% ipsilateral volume)
P30	5.022809882	14.67848926					Dccfl/fl	Dkk3-Cre;DCCfl/fl
	4.433345623	11.85685675				P30	46.88217278	39.21265861
	4.344687107	21.54096421					58.38514633	47.94733229
	4.762329626	12.65658999					30.35709455	31.43034861
	4.263534009	21.23854337					51.37449021	32.9703036
							47.14672172
N	5	5					44.04043879
Mean	4.565	16.39
SEM	0.1424	2.091				N	6	4
SD	0.3183	4.676				Mean	46.36	37.89
						SEM	3.795	3.751
						SD	9.296	7.502
Figure 5R
Medial Terminal Nucleus (µm3)
	Dccfl/fl	Dkk3-Cre;DCCfl/fl
P15	12691400	8932100
	12536100	1913920
	12928600	5192110
	13281200	6014750
	13503600
N	5	4
Mean	12988180	5513220
SEM	179933.733357589	1443327.89406404
SD	402344.059232891	2886655.78812808
Medial Terminal Nucleus (µm3)
P30	20967100	13053700
	22813400	1706800
	20635200	4132970
	22240300	5846170
	22755900	14718900
	24667700
N	6	5
Mean	22346600	7891708
SEM	594870.961918073	2547765.06023887
SD	1457130.31949788	5696975.86539297
