# Supplementary material for: Revisiting the role of Dcc in visual system development with a novel eye clearing method
Source: eLife. 2020 Feb 25;9:e51275. doi: 10.7554/eLife.51275 (PMC7062470; doi:10.7554/eLife.51275)
Supplement: Figure 6—source data 1. [file elife-51275-fig6-data1.xlsx]

## Sheet: Feuil1
Figure 6C						Figure 6D						Figure 6M
	Optic nerve volume (µm3)						Optic Tract volume (µm3)						Medial Terminal Nucleus volume (µm3)
genotype	DCC+/+	DCC+/-	DCCKanga/+	DCCKanga/-		genotype	DCC+/+	DCC+/-	DCCKanga/+	DCCKanga/-		genotype	DCC+/+	DCC+/-	DCCKanga/+	DCCKanga/-
Adult	62912600	55821600	62270800	20480700		Adult	112784000	125325000	95567400	44417100		Adult	16161200	12960800	12522200	15223000
	66639200	61483800	70981696	10748300			140323008	130978000	131386000	47949900			14801600	18400900	23514500	9875080
	47803500	53508800	51388400	15333500			148931008	125232000	137316992	54268300			23833700	13097800	13950200	5010810
		64115800	61112300	13177700				130145000	177131008	82498704				13585600	19369500	7026270
		52164800	48998600	7559970				150938000	210708992	40945100				15100700	13707800	13939600
				19198700						62102900						5723570
				14998300						52457100						2300410
				24250400						107254000						5610130
				24813300						69537904						6235230
N	3	5	5	9		N	3	5	5	9		N	3	5	5	9
Minimum	47803500	52164800	48998600	7559970		Minimum	112784000	125232000	95567400	40945100		Minimum	14801600	12960800	12522200	2300410
25% Percentile	47803500	52836800	50193500	11963000		25% Percentile	112784000	125278500	113476700	46183500		25% Percentile	14801600	13029300	13115000	5310470
Median	62912600	55821600	61112300	15333500		Median	140323008	130145000	137316992	54268300		Median	16161200	13585600	13950200	6235230
75% Percentile	66639200	62799800	66626248	22365550		75% Percentile	148931008	140958000	193920000	76018304		75% Percentile	23833700	16750800	21442000	11907340
Maximum	66639200	64115800	70981696	24813300		Maximum	148931008	150938000	210708992	107254000		Maximum	23833700	18400900	23514500	15223000
Mean	59118433	57418960	58950359	16728986		Mean	134012672	132523600	150422078	62381223		Mean	18265500	14629160	16612840	7882678
Std. Deviation	9974601	5167632	8897656	5910757		Std. Deviation	18881653	10631604	44415735	21284861		Std. Deviation	4869884	2272987	4676920	4289804
Std. Error of Mean	5758839	2311035	3979153	1970252		Std. Error of Mean	10901327	4754598	19863321	7094954		Std. Error of Mean	2811629	1016511	2091582	1429935
Lower 95% CI of mean	34340150	51002497	47902460	12185575		Lower 95% CI of mean	87108047	119322720	95272659	46020230		Lower 95% CI of mean	6168038	11806874	10805677	4585242
Upper 95% CI of mean	83896717	63835423	69998258	21272396		Upper 95% CI of mean	180917297	145724480	205571498	78742216		Upper 95% CI of mean	30362962	17451446	22420003	11180113
Sum	177355300	287094800	294751796	150560870		Sum	402038016	662618000	752110392	561431008		Sum	54796500	73145800	83064200	70944100
