# Supplementary material for: Revisiting the role of Dcc in visual system development with a novel eye clearing method
Source: eLife. 2020 Feb 25;9:e51275. doi: 10.7554/eLife.51275 (PMC7062470; doi:10.7554/eLife.51275)
Supplement: Figure 6—source data 2. [file elife-51275-fig6-data2.xlsx]

## Sheet: Feuil1
Figure 6-Supplementary Figure1A				Figure 6-Supplementary Figure1B				Figure 6-Supplementary Figure1C
optic nerve volume (µm3)				optic tract volume (µm3)				Medial Terminal Nucleus volume (µm3)
genotype	Dkk3-Cre;Dccfl/fl	DccKanga/-		genotype	Dkk3-Cre;Dccfl/fl	DccKanga/-		genotype	Dkk3-Cre;Dccfl/fl	DccKanga/-
Adult	12476400	20480700		Adult	49650900	44417100		Adult	13053700	15223000
	3986140	10748300			15649300	47949900			1706800	9875080
	14969100	15333500			57210500	54268300			4132970	5010810
	7259130	13177700			51662400	82498704			5846170	7026270
		7559970			63923300	40945100			14718900	13939600
		19198700				62102900				5723570
		14998300				52457100				2300410
		24250400				107254000				5610130
		24813300				69537904				6235230
N	4	9		N	5	9		N	5	9
Mean	9672693	16728986		Mean	47619280	62381223		Mean	7891708	7882678
SEM	2484533	1970252		SEM	8367695	7094954		SEM	2547765	1429935
SD	4969067	5910757		SD	18710735	21284861		SD	5696976	4289804
