# Supplementary material for: Revisiting the role of Dcc in visual system development with a novel eye clearing method
Source: eLife. 2020 Feb 25;9:e51275. doi: 10.7554/eLife.51275 (PMC7062470; doi:10.7554/eLife.51275)
Supplement: Figure 7—source data 1. [file elife-51275-fig7-data1.xlsx]

## Sheet: Feuil1
Figure 7-Supplementary Figure 1 K
RBPMS+ cells/µm2
	Dccfl/fl	Dkk3-Cre;DCCfl/fl
P0	2434.5	1223
	2315.75	1120.25
	2583.5	742.75
	2538.67	901
	2818.5
	2710
N	6	4
Mean	2566.82	996.75
SEM	74.2650000561054	108.060698606539
SD	181.911355885222	216.121397213079
P15	1409.75	34.75
	1522.75	517
	1654.33	24
	1922.75	548.5
N	4	4
Mean	1627.395	281.0625
SEM	110.408330112964	145.470586051786
SD	220.816660225929	290.941172103571
P30	1450.25	92.75
	1609.5	158
	1696.75	308.33
	1713.75	271.5
	1708	9.5
	1585	10
N	6	6
Mean	1627.20833333333	141.68
SEM	41.7381428605112	52.3122410786105
SD	102.237152819641	128.138297944057
