# Supplementary material for: Revisiting the role of Dcc in visual system development with a novel eye clearing method
Source: eLife. 2020 Feb 25;9:e51275. doi: 10.7554/eLife.51275 (PMC7062470; doi:10.7554/eLife.51275)
Supplement: Figure 7—source data 2. [file elife-51275-fig7-data2.xlsx]

## Sheet: Feuil1
Figure 7-Supplementary Figure 2G				Figure 7-Supplementary Figure 2H					Figure 7-Supplementary Figure 2J
number of Chat+ cells/µm2 GCL				number of Chat+ cells/µm2 INL						Thickness (µm)
	Dccfl/fl	Dkk3-Cre;DCCfl/fl			Dccfl/fl	Dkk3-Cre;DCCfl/fl				Dccfl/fl	Dkk3-Cre;DCCfl/fl
P15	592.75	501		P15	641.25	617			Retina total	171	99.63333333
	538.25	459.5			609.75	547				176	107.5
	689	566			777.33	584				170	100
	624.5	475.75			692.5	490.75
									N	3	3
N	4	4		N	4	4			Mean	172.3	102.4
Mean	611.125	500.5625		Mean	680.2075	559.6875			Std. Deviation	3.215	4.44
SEM	31.4799043041748	23.4237181701938		SEM	36.5898798337737	27.0634622615683			Std. Error of Mean	1.856	2.563
SD	62.9598086083495	46.8474363403876		SD	73.1797596675474	54.1269245231367			Lower 95% CI of mean	164.3	91.35
									Upper 95% CI of mean	180.3	113.4
P30	382.67	541.25		P30	447	537.5			Sum	517	307.1
	414	465.75			568.5	551.75
	479.75	576.33			583.75	626.33			ONL	54.73333333	33.73333333
	446	531.75			538.25	596.75				56.93333333	36.7
	540.75	461			622	528.5				52.23333333	40.66666667
	551.5	362			619	340
									N	3	3
N	6	6		N	6	6			Mean	54.63	37.03
Mean	469.111666666667	489.68		Mean	563.083333333333	530.138333333333			Std. Deviation	2.352	3.479
SEM	27.7348571796896	31.4297852363009		SEM	26.5495344173448	40.9741703529322			Std. Error of Mean	1.358	2.008
SD	67.936248179206	76.9869365541973		SD	65.0328122309551	100.365809998558			Lower 95% CI of mean	48.79	28.39
									Upper 95% CI of mean	60.48	45.67
									Sum	163.9	111.1
									OPL	8.15	5.48
										9.383333333	10.16333333
										8.473333333	5.543333333
									N	3	3
									Mean	8.669	7.062
									Std. Deviation	0.6395	2.686
									Std. Error of Mean	0.3692	1.551
									Lower 95% CI of mean	7.08	0.3903
									Upper 95% CI of mean	10.26	13.73
									Sum	26.01	21.19
									INL	30.5	18.63333333
										34.36666667	22.5
										24.7	17.5
									N	3	3
									Mean	29.86	19.54
									Std. Deviation	4.865	2.622
									Std. Error of Mean	2.809	1.514
									Lower 95% CI of mean	17.77	13.03
									Upper 95% CI of mean	41.94	26.06
									Sum	89.57	58.63
									IPL	39.6	21.83333333
										41.2	18.6
										40.83333333	20.36666667
									N	3	3
									Mean	40.54	20.27
									Std. Deviation	0.8382	1.619
									Std. Error of Mean	0.4839	0.9347
									Lower 95% CI of mean	38.46	16.24
									Upper 95% CI of mean	42.63	24.29
									Sum	121.6	60.8
									ChAT	15.06666667	7.57
										16.76666667	8.97
										16.93333333	6.846666667
									N	3	3
									Mean	16.26	7.796
									Std. Deviation	1.033	1.079
									Std. Error of Mean	0.5964	0.6232
									Lower 95% CI of mean	13.69	5.114
									Upper 95% CI of mean	18.82	10.48
									Sum	48.77	23.39
