# Supplementary material for: Revisiting the role of Dcc in visual system development with a novel eye clearing method
Source: eLife. 2020 Feb 25;9:e51275. doi: 10.7554/eLife.51275 (PMC7062470; doi:10.7554/eLife.51275)
Supplement: Figure 7—source data 3. [file elife-51275-fig7-data3.xlsx]

## Sheet: Feuil1
	Figure 7-Supplementary Figure3C				Figure 7-Supplementary Figure3F
	number of Rbpms+ cells/µm2				number of Chat+ cells/µm2 GCL
		DCCKanga/+	DCCKanga/-			DCCKanga/+	DCCKanga/-
	Adult	1773	704		Adult	408	523
		1401	26			362	436
		2172	499			440	526
		2013	787			372	412
	N	4	4		N	4	4
	Mean	1840	504		Mean	395.5	474.3
	SEM	167.7	170.5		SEM	17.82	29.43
	SD	335.3	340.9		SD	35.64	58.86
					Figure 7-Supplementary Figure3F
					number of Chat+ cells/µm2 INL
						DCCKanga/+	DCCKanga/-
					Adult	497	599
						408	444
						486	476
						403	433
					N	4	4
					Mean	448.5	488
					SEM	49.9	76.21
					SD	24.95	38.11
