# Supplementary material for: Revisiting the role of Dcc in visual system development with a novel eye clearing method
Source: eLife. 2020 Feb 25;9:e51275. doi: 10.7554/eLife.51275 (PMC7062470; doi:10.7554/eLife.51275)
Supplement: Figure 8—source data 1. [file elife-51275-fig8-data1.xlsx]

## Sheet: Feuil1
Figure 8R
retina volume (µm3)
	P15	P30	P180
Dkk3-Cre;DCCfl/fl	881233984	1518579968	1248200000
	489508992	711942016	802976000
	880083008	1412819968	610121024
	873257024	1467890048	219651008
	729657024	1504259968
rosette volume (µm3)
	P15	P30	P180
Dkk3-Cre;DCCfl/fl	173160000	333766016	177510000
	149663008	172731008	228465000
	202899008	203763008	69006496
	177763008	275064000	36796400
	114100000	318036992
Rosette volume (%)
	P15	P30	P180
Dkk3-Cre;DCCfl/fl	19.6497188197408	21.978823837613	14.2212786412434
	30.5741080237398	24.2619488832079	28.4522825090663
	23.0545307835326	14.4224326251878	11.31029636507
	20.3563215770939	18.7387332160726	16.7522108525903
	15.6374839475266	21.1424221055918
N	5	5	4
Minimum	15.64	14.42	11.31
25% Percentile	17.64	16.58	12.04
Median	20.36	21.14	15.49
75% Percentile	26.81	23.12	25.53
Maximum	30.57	24.26	28.45
Mean	21.85	20.11	17.68
Std. Deviation	5.55	3.743	7.515
Std. Error of Mean	2.482	1.674	3.758
Lower 95% CI of mean	14.96	15.46	5.726
Upper 95% CI of mean	28.75	24.76	29.64
Sum	109.3	100.5	70.74
