# Supplementary material for: Revisiting the role of Dcc in visual system development with a novel eye clearing method
Source: eLife. 2020 Feb 25;9:e51275. doi: 10.7554/eLife.51275 (PMC7062470; doi:10.7554/eLife.51275)
Supplement: Figure 8—source data 2. [file elife-51275-fig8-data2.xlsx]

## Sheet: Feuil1
Figure 8-Supplementary Figure1C
Rostro-Caudal
			Before EyeDISCO	After EyeDISCO	% shrinkage
length (µm)	8721	Left eye	0.321428571	0.279464286	13.0555555555556
		Right eye	0.321428571	0.275	14.4444444444444
	8722	Left eye	0.308928571	0.28125	8.95953757225433
		Right eye	0.3	0.254464286	15.1785714285714
	8723	Left eye	0.30625	0.275892857	9.9125364431487
		Right eye	0.308928571	0.286607143	7.22543352601154
	8724	Left eye	0.323214286	0.265178571	17.9558011049724
		Right eye	0.328571429	0.277678571	15.4891304347826
Dorso-ventral
			Before EyeDISCO	After EyeDISCO	% shrinkage
length (µm)	8721	Left eye	0.314285714285714	0.295535714285714	5.96590909090911
		Right eye	0.325	0.291071428571429	10.4395604395604
	8722	Left eye	0.314285714285714	0.294642857142857	6.25000000000001
		Right eye	0.334821428571429	0.291071428571429	13.0666666666667
	8723	Left eye	0.325	0.301785714285714	7.14285714285714
		Right eye	0.3125	0.277678571428571	11.1428571428571
	8724	Left eye	0.320535714285714	0.29375	8.35654596100277
		Right eye	0.320535714285714	0.305357142857143	4.73537604456823
Medio-lateral
			Before EyeDISCO	After EyeDISCO	% shrinkage
length (µm)	8721	Left eye	0.317857142857143	0.272321428571429	14.3258426966292
		Right eye	0.325	0.290178571428571	10.7142857142857
	8722	Left eye	0.311607142857143	0.291071428571429	6.59025787965616
		Right eye	0.341964285714286	0.291071428571429	14.8825065274151
	8723	Left eye	0.320535714285714	0.289285714285714	9.74930362116991
		Right eye	0.305357142857143	0.300892857142857	1.46198830409357
	8724	Left eye	0.304464285714286	0.296428571428571	2.6392961876833
		Right eye	0.304464285714286	0.296428571428571	2.6392961876833
