# Supplementary material for: Revisiting the role of Dcc in visual system development with a novel eye clearing method
Source: eLife. 2020 Feb 25;9:e51275. doi: 10.7554/eLife.51275 (PMC7062470; doi:10.7554/eLife.51275)
Supplement: Figure 8—source data 3. [file elife-51275-fig8-data3.xlsx]

## Sheet: Feuil1
	Figure 8-Supplementary Figure 2U
	Photoreceptor layer thickness (µm)
		DCCfl/fl	Dkk3-Cre;DCCfl/fl
	1 month	103.88	72.756
		112.456	74.046
		108.704	75.852
	N	3	3
	Minimum	103.9	72.76
	25% Percentile	103.9	72.76
	Median	108.7	74.05
	75% Percentile	112.5	75.85
	Maximum	112.5	75.85
	Mean	108.3	74.22
	Std. Deviation	4.299	1.555
	Std. Error of Mean	2.482	0.8979
