# Supplementary material for: Revisiting the role of Dcc in visual system development with a novel eye clearing method
Source: eLife. 2020 Feb 25;9:e51275. doi: 10.7554/eLife.51275 (PMC7062470; doi:10.7554/eLife.51275)
Supplement: Figure 8—source data 4. [file elife-51275-fig8-data4.xlsx]

## Sheet: Feuil1
Figure 8-Supplementary fig 3A																		Figure 8-Supplementary fig 3B																			Figure 8-Supplementary fig 3B
Scotopic - 1month a-wave																		Photopic 1 month a-wave																			Photopic - 1month b-wave
cds	Dccfl/fl						Dkk3-Cre;DCCfl/fl													Dccfl/fl						Dkk3-Cre;DCCfl/fl											cds	Dccfl/fl						Dkk3-Cre;DCCfl/fl
3.10-3	-2.985	-1.818	5.2685	13.8985	7.6475		4.763	21.1	-2.9275	7.4505	2.905								time (ms)	1	2	3	4	5		1	2	3	4	5							10	57.935	92.135	115.2	99.305	59.14		25.38	3.05	13.8455	24.215	14.01
3.10-2	36.71	25.6	44.005	35.3	26.91		-13.4815	9.311	17.025	22.21	28.005								-50	-0.496514343	-5.205217041	-4.034253174	-0.305965454	-3.251849365		-5.407111084	-8.066776367	7.393041504	12.68157031	-2.294425293
3.10-1	87.99	134.8	132.15	133.4	111.765		44.53	42.53	88.49	86.95	110.5								-49	-0.801870239	-5.290106689	-3.590983887	-0.670652252	-3.230569336		-5.255188721	-7.360013428	7.541726807	13.35956543	-1.917436737							Photopic - 6month b-wave
3	167.25	206.65	162.7	225.1	160.05		42.715	108.745	103.765	139.7									-48	-0.460038696	-5.33799646	-3.811964722	-1.083338989	-3.001289063		-5.282266357	-7.492625	7.190411621	14.06956055	-1.556448181							cds	Dccfl/fl									Dkk3-Cre;DCCfl/fl
10	164.65	245.6	151	263.75	208.9		45.64	120.25	95.385	166.9									-47	-0.187832153	-5.189886108	-4.549820313	-1.352025818	-2.308009033		-5.482843994	-8.027111572	7.40109668	14.09155615	-0.999459717							10	100.68	94.165	46.937	98.84	55.07	49.745	70.26	29.709		3.9995	69.815	43.865
																			-46	0.368936951	-4.946775635	-6.144301025	-1.236712463	-2.518728821		-5.492546631	-8.103848633	6.867781738	13.68155078	-0.446471191
Scotopic - 1month b-wave																			-45	0.933956024	-4.640665283	-7.476156738	-1.377399261	-3.08144873		-5.055999268	-7.868335205	5.846466797	14.11954639	-0.905482666
cds	Dccfl/fl						Dkk3-Cre;DCCfl/fl												-44	1.239787598	-4.441555054	-7.911887207	-1.742086029	-2.956168579		-4.672951904	-7.579446777	5.325151855	14.50954102	-1.832494141
3.10-3	55.55	0.5795	179.5	211.75	200.9		29.805	97.22	64.65	105.25	161.2								-43	1.405931641	-4.35744458	-7.731993408	-1.722772827	-3.77488855		-4.407029541	-7.679183594	4.837836914	14.03553662	-2.751505737
3.10-2	-64.41	6.2215	196.18	273.9	227.44		48.24	91.2875	60.145	204.75	231.15								-42	1.854450745	-4.269334351	-7.022974121	-1.783459488	-4.361608398		-3.956482178	-8.303920654	4.600522217	13.68953174	-3.574517212
3.10-1	-62.41	15.02	299.4	293.75	221.175		102.39	112.545	97.295	199.8	250.05								-41	2.177907288	-4.276223999	-6.33420459	-2.596146301	-4.164328125		-3.705184814	-9.011407227	4.875207275	13.48752686	-3.593528687
3	15.748	90.165	434.45	450.6	295.51		49.565	158.27	107.305	306									-40	1.634176392	-4.327113525	-5.951185547	-3.504833008	-4.599048096		-4.157137451	-9.200768555	4.967892334	13.06152246	-2.860540161
10	136.455	99.815	500.15	440.7	321.2		88.65	127.8175	103.75	299.4									-39	0.881320557	-4.536003174	-5.65291626	-4.061519897	-4.833768066		-4.698340088	-8.925880859	4.822577393	12.68351758	-2.219551636
																			-38	0.101589539	-4.642892822	-5.637146973	-4.538206543	-4.540487793		-4.963042725	-9.130992188	4.943262451	12.1935127	-1.770563202
																			-37	-0.440453918	-3.973782471	-5.902377686	-4.854893311	-4.311207642		-5.715495361	-9.350728516	5.367947754	11.60750781	-1.129574646
																			-36	-1.071684723	-3.268672241	-6.420108398	-4.915580078	-4.193927612		-6.520947998	-9.08921582	5.900632568	11.14950342	-0.388586182
Scotopic - 6months a-wave																			-35	-1.924415794	-3.14556189	-6.420089111	-5.104266846	-4.012647217		-6.798275635	-8.972452148	6.275317871	11.20349854	0.520402344
cds	Dccfl/fl									Dkk3-Cre;DCCfl/fl									-34	-1.916646622	-2.438451416	-5.910194824	-5.756953857	-4.039367188		-6.842603271	-9.553063965	6.374002686	11.25749365	0.713390869
3.10-3	64.35	14.445	16.425	2.009	2.37	2.347	13.11	4.7035		3.958	5.7935	2.3215	12.901	7.3635	0.6125	8.16			-33	-1.333315063	-1.519341187	-5.739425781	-6.793640381	-4.674087158		-6.984056152	-9.367800781	6.102687744	10.60748877	0.474379333
3.10-2	10.1165	23.02	10.167	11.2175	13.148	13.46	17.94	15.81		10.1255	24.835	14.88	8.9045	3.715	10.7335	7.1765			-32	-1.006670891	-1.430230835	-5.43228125	-7.894327393	-5.316807129		-7.145633789	-8.184662598	5.575373047	10.32548389	0.72736792
3.10-1	83.945	102.48	34.49	74.045	55.125	80.18	108.6	33.995		39.005	85.265	8.1985	83.665	38.23	20.25	26.205			-31	-0.532964386	-1.903120361	-5.624886963	-8.291013916	-5.183526855		-6.953461426	-7.96852417	5.054058105	10.20347949	0.700356445
3	107.065	164.55	117.6	112.8	91.965	149.35	148.8	43.7505		45.775	133.9	31.19	134.45	85.28	43.215	66.79			-30	0.026117218	-2.325010254	-6.22849292	-7.599700439	-4.930246948		-7.266789063	-8.339385986	4.858743164	9.409474609	0.681344879
10	143.245	174.35	105.995	147.1	101.15	171.6	134.1	38.1955		66.3	146.4	19.6505	146.05	79.3	52.375	56.68			-29	0.085386292	-2.29489978	-6.600598389	-7.180387451	-4.852966553		-8.090616699	-8.404622559	5.295428223	8.839469727	0.370333313
																			-28	0.061342896	-2.229789429	-7.29520459	-6.537074219	-4.575686523		-8.345444336	-8.188234375	5.978113281	8.717464844	-0.828678101
Scotopic - 6months b-wave																			-27	-0.318825623	-1.909679077	-7.909560059	-5.685760986	-4.362406494		-8.097896729	-8.006095947	6.012798584	7.907460205	-1.015689575
cds	Dccfl/fl									Dkk3-Cre;DCCfl/fl									-26	-0.311806458	-1.428568726	-8.632791016	-5.89044751	-4.149126099		-7.709099365	-7.891958008	5.445483643	6.873455566	0.481298889
3.10-3	132.75	272.95	158.1	157.45	15.2315	113.615	210.7	73.575		52.675	142.3	75.975	115.3	6.466	22.31	28.44			-25	0.362775085	-1.355458374	-8.747146484	-5.679134521	-3.599846069		-7.139927002	-7.546569336	5.344168579	6.495450684	1.598287354
3.10-2	192.865	347.5	349.5	213.85	33.935	124.0445	242.6	101.08		58.27	178.25	42.985	209.75	2.073	14.979	57.71			-24	0.191356628	-1.524348022	-7.572751953	-5.067821411	-2.938565979		-6.296379639	-6.963931152	5.050853638	5.669446045	1.891276001
3.10-1	217.043	367.9	220.3	258.95	67.465	182.735	269.7	72.0475		76.33	190.7	57.135	249.5	18.7575	40.36	70.87			-23	-0.225686768	-1.619237671	-5.97085791	-4.504508179	-2.653285889		-5.806582275	-6.313292725	4.499538574	4.683440918	2.580264404
3	218.695	480.75	281.9	350	113.83	321.15	318.2	108.505		102.88	254.8	96.115	352.8	18.8265	33.608	89.045			-22	-0.572980179	-1.577127441	-4.043838745	-3.477194702	-2.792005737		-5.689159912	-6.018029541	4.198223877	4.449436279	2.821252808
10	252.03	462.75	318.45	389.65	126.415	365.6	272.2	65.7305		142.02	261.55	35.245	387.15	29.162	35.905	87.05			-21	-1.22189856	-1.59901709	-2.756944336	-2.83388147	-2.810725464		-5.519487549	-5.968641357	3.592908691	4.407431641	1.930241516
																			-20	-1.577629517	-1.740906738	-2.189175293	-2.462568237	-2.605445435		-5.618440186	-5.66200293	2.989593994	4.413426758	1.311229965
																			-19	-1.586172974	-1.856796143	-2.010780884	-1.963255005	-2.608165283		-5.819767822	-5.115989746	2.786279053	4.179421875	1.064218384
																			-18	-1.679966278	-1.851686035	-2.783636475	-2.151941772	-2.506885132		-5.466595459	-4.830976318	2.326964111	3.67341748	1.041206848
																			-17	-1.970697205	-1.737575684	-3.867242432	-2.61262854	-2.173605103		-4.765173096	-4.807088135	1.22364917	3.199412109	1.518195526
																			-16	-1.864240662	-1.570465454	-5.048223022	-2.96131543	-1.488324829		-4.121000732	-4.144324707	0.466334106	2.757407715	2.03918396
																			-15	-1.089034119	-2.28835498	-5.699078857	-3.822002197	-0.8270448		-3.931578369	-3.400811768	0.275019409	2.57140332	2.324172363
																			-14	-0.406702515	-3.057244629	-5.48018457	-4.218688965	-0.277764771		-4.079031006	-3.17242334	0.247704712	2.929397949	2.317161133
																			-13	0.188816574	-2.671134277	-4.706165405	-3.68737561	0.391515381		-3.911108643	-2.656159912	0.468389526	3.623393555	2.218149536
																			-12	1.118023132	-2.170023926	-3.075770996	-3.156062378	0.468795654		-3.862061035	-2.092646729	1.093074707	3.997388672	2.055138184
																			-11	1.928542236	-1.587913696	-1.611751709	-3.360749023	0.346075806		-3.532763794	-1.672508301	1.207759766	3.955383789	2.092126617
																			-10	2.507123688	-0.883803345	-0.964982544	-3.837435791	0.287355835		-2.478216431	-1.418245361	0.816444824	3.881378906	2.157115051
																			-9	3.142017883	-0.195692871	-0.758213257	-3.226122681	0.140635986		-1.266668945	-1.535606934	1.451129883	3.679374268	1.954103485
																			-8	3.559099365	0.45741748	-0.642943848	-2.358809448	0.225916138		-0.197746582	-2.061343506	2.519814941	3.189369141	2.255091919
																			-7	3.68786853	0.36152771	-0.369799805	-1.843496216	0.343196289		0.413050781	-2.283455078	2.8545	2.779364746	2.620080566
																			-6	3.750575226	-0.010361816	-0.022405396	-1.136182983	0.236476318		0.779723145	-1.452691895	2.453185303	2.481359863	1.957069031
																			-5	3.085469177	0.123748535	0.140364014	-0.492869751	-0.318243408		1.062770508	-0.363553467	1.907870239	1.92735498	1.102057495
																			-4	1.82717572	0.309858643	-0.081866699	0.134443588	-0.592963257		0.944067871	0.138709473	1.490555298	1.245350586	0.651045898
																			-3	0.72969487	-0.202030762	-0.033597778	0.377756836	0.068316895		0.454490234	-0.048901855	0.913240356	0.851345215	0.344034607
																			-2	-0.355598633	-0.638920532	0.090546631	0.221070007	0.825596924		0.035162598	-0.093513916	0.239925293	0.74534082	0.62102301
																			-1	-1.305266937	-0.052810303	-0.447934082	0.40038324	1.118877014		0.186209961	0.406874512	-0.351389648	0.383335938	1.414011475
																			0	-1.752185364	0.484300293	-0.604040039	1.107696533	1.236157104		0.598632324	0.419762939	-0.516704346	-0.426668945	1.955000122
																			1	-2.05091626	0.501410645	0.029104492	1.431009766	1.5054375		0.788679688	-0.162474121	-0.614019531	-1.236673828	1.399988525
																			2	-2.430772217	0.250520752	0.260123779	1.274322998	1.542717529		1.096477051	0.156164551	-1.083334229	-1.326678223	0.240977051
																			3	-2.306628174	0.094631348	0.488267822	1.83763623	1.603997559		1.719399414	0.930427246	-1.332648926	-0.792683105	-0.514034439
																			4	-1.48717157	0.252741455	1.047412354	2.304949463	1.55327771		1.790571777	0.661440918	-1.465964111	-0.978687988	-1.429046021
																			5	-0.845090027	-0.028148193	1.029681641	2.180262634	0.614557861		0.857744141	0.564579346	-1.621278809	-1.740692383	-2.192057495
																			6	-1.335570923	-0.071037598	0.757200684	2.007575867	-0.164161987		-0.219958496	1.420467285	-1.740593994	-2.294697266	-1.947068848
																			7	-1.96980188	0.26407251	0.931095215	1.066889084	-1.494881958		-1.011161133	1.814230957	-1.811908691	-3.040702637	-2.146080444
																			8	-2.605845337	-0.132817139	0.456489258	-0.225797729	-3.633601807		-2.12811377	1.432994141	-1.777223389	-3.946707031	-4.013091919
																			9	-3.845513672	-0.884706665	-1.300866455	-1.230484375	-5.100321533		-3.424566406	1.478507324	-2.334538818	-5.380711914	-6.432103516
																			10	-5.111119629	-1.734596436	-3.153347046	-2.251171265	-6.655041504		-4.441519043	1.596895996	-2.961853516	-7.02271582	-8.551115234
																			11	-6.382038086	-3.015486084	-5.401702881	-3.223857971	-8.369761475		-4.67084668	0.580658936	-2.989168701	-8.088720703	-10.65012646
																			12	-7.615331299	-4.32337561	-7.713808838	-4.132544678	-9.956481201		-4.141674316	-0.840702637	-2.986483398	-9.154726563	-11.9011377
																			13	-9.762375	-5.882265137	-9.052164551	-5.185231445	-11.95120117		-4.176751953	-1.657939453	-3.325798096	-9.996730469	-12.43614941
																			14	-12.35854297	-7.610155273	-10.37977002	-6.589918213	-13.9699209		-4.36495459	-2.07755127	-3.813113281	-10.32673535	-13.35916113
																			15	-14.2420874	-8.798044922	-11.70187598	-8.69860498	-15.06864111		-3.966032227	-2.725787842	-4.142427979	-10.72074023	-13.88217188
																			16	-15.90594287	-10.11693433	-12.36860645	-10.29529175	-15.55936035		-3.832734741	-3.601899658	-3.893743164	-10.53874609	-13.61718359
																			17	-17.35948633	-10.43482397	-13.21033691	-10.89997852	-16.08208105		-4.3125625	-3.953261475	-2.837057861	-9.71675	-13.94019531
																			18	-18.4647793	-9.505713379	-14.27194336	-11.55266504	-15.93280029		-4.587390137	-4.018122803	-1.588372559	-9.822754883	-15.31520703
																			19	-18.60757324	-8.770603027	-14.83317334	-11.51735205	-14.96752002		-4.314217773	-4.188734619	-0.947687744	-9.832759766	-16.12621826
																			20	-17.93749121	-7.918492676	-14.56640479	-10.98603906	-13.09024023		-3.718545288	-4.158596436	-1.093002686	-8.914763672	-16.79322998
																			21	-16.90040918	-6.602382324	-13.25538477	-10.3267251	-10.71696045		-2.840747925	-3.848208252	-1.514317871	-8.156769531	-17.50824121
																			22	-15.56089014	-4.338272339	-11.54649121	-8.931412109	-7.903679688		-2.345700562	-3.432695068	-2.093632568	-7.094774414	-16.75925293
																			23	-14.19787109	-1.843161865	-9.78134668	-6.256098877	-4.73039978		-2.561278198	-3.169681396	-2.224947754	-5.79277832	-15.81426416
																			24	-12.12691504	0.294948242	-7.967327393	-2.796785767	-1.429119873		-2.801230835	-2.172168213	-1.520262451	-3.946783203	-15.00127588
																			25	-9.297583496	3.033059082	-6.609683105	0.934527344	3.176160645		-2.761058472	-0.324405029	-1.131577148	-1.236788574	-13.44828711
																			26	-6.471314209	6.890168945	-5.60066394	5.68984082	10.42944025		-2.800386108	0.440108398	-0.714892334	1.233207031	-11.96329883
																			27	-3.587670288	11.8722793	-3.333394531	10.74915356	21.3067207		-2.911963745	-0.014253662	0.519792969	3.527202393	-10.53031055
																			28	0.460598877	18.95738965	-0.340500488	15.23246729	34.39200098		-3.002291382	-0.16548999	2.100478027	4.829197266	-9.341321533
																			29	6.493743042	27.7745	2.949143799	18.65978101	46.67728027		-3.066869019	0.845023438	3.601162964	5.651192871	-8.836333252
																			30	14.07207471	36.52261035	8.40541272	19.87909277	54.55456055		-2.681946533	2.927161377	3.913848022	6.569187988	-8.947344971
																			31	22.90865625	44.5487207	14.18293213	19.59440674	57.5118418		-1.76027417	5.260049805	2.984532959	6.911183105	-9.990356567
																			32	33.87861328	50.90883105	18.92045264	19.38972034	58.54912109		-1.049851807	7.245187744	2.359218262	7.717178711	-10.87736768
																			33	45.33825684	55.19394141	22.9464707	19.44103406	58.92240234		-0.674929443	8.862950928	2.355903442	8.731173584	-11.56037939
																			34	53.57090234	57.83005273	25.47874121	20.53234589	59.06368359		-0.415756958	9.599464844	2.554588379	9.185168945	-12.47139111
																			35	59.08354492	58.49916211	26.97988477	23.12765967	58.82096289		-0.842084595	9.237477783	2.575273438	9.559164307	-12.68240234
																			36	62.83156445	57.16127344	27.99377832	26.42697339	58.09024023		-1.662537231	8.972240723	2.827958496	10.01315918	-12.25341406
																			37	64.56358398	55.02638281	28.31567285	29.93428711	57.00752148		-3.027989868	8.665629883	3.488643799	10.4671543	-12.18042529
																			38	65.10260352	52.20649414	28.16069141	33.15359888	55.43680078		-4.783442505	8.235017578	3.623328857	11.0811499	-12.50743701
																			39	64.15987305	48.37860547	28.16108691	35.7489126	53.40208203		-5.909145142	8.205030762	3.694013916	12.22314478	-12.60244824
																			40	62.49376758	44.99271289	28.95460547	38.12022656	51.29536133		-6.687222778	7.630669434	3.718698975	13.38114063	-12.96945947
																			41	60.39491016	42.70382422	30.22037598	40.02754004	49.60464258		-7.641425415	6.818057617	3.579384033	14.74713452	-13.65647119
																			42	56.79417773	41.29593359	30.86901953	41.262854	49.18592383		-8.632503174	6.393820557	4.198069336	16.65713062	-13.93148242
																			43	52.34407227	42.73604492	31.34728906	41.63416748	50.81520117		-8.550330811	6.553209717	5.368753906	17.68712646	-13.73849438
																			44	48.7264668	48.24815625	32.39618262	41.74947754	54.00448242		-7.675283447	7.421722656	6.383439453	18.62112012	-13.12150586
																			45	46.04798633	55.66026758	33.47945117	42.00879102	59.08176172		-7.388486084	7.731985352	6.972124268	20.00311621	-12.27651758
																			46	44.18612891	62.05437695	34.75484668	41.96410498	65.83104102		-7.316563721	7.836123535	7.764809082	20.6171123	-12.10752832
																			47	46.71427344	66.43348828	37.36924023	42.52741846	72.78832422		-7.313391357	8.467012451	8.559494629	21.05510547	-12.39054004
																			48	55.96141602	68.83159863	40.52663574	43.13873242	79.47360156		-8.11009375	8.833150635	8.676179932	21.07710156	-12.37355176
																			49	69.37156055	69.42570898	43.19240332	43.60604639	85.79088281		-8.395046387	9.674288574	8.514864746	21.22709766	-13.11656348
																			50	83.47045508	69.10481934	45.92467383	44.34535986	91.71616406		-8.051874023	12.20092749	8.293549561	21.9530918	-14.58757495
																			51	96.16384766	69.28692578	48.07844434	45.00466992	95.88144531		-8.28282666	15.35756543	8.310234863	21.60708789	-15.74658643
																			52	105.9124922	71.05903711	48.99033594	46.2719834	97.59872656		-8.367279297	18.12470337	8.26892041	20.71708301	-16.52159717
																			53	111.6468867	73.26314648	49.55485645	48.21129736	98.07600391		-8.249731934	20.14984155	7.927605225	19.90707813	-17.22060889
																			54	114.1570313	74.79025781	50.10800195	50.63061133	97.80128125		-7.96380957	20.63397949	7.930290039	19.22507324	-17.96762061
																			55	113.4466758	75.19036719	50.44989258	53.1139248	96.7745625		-7.618262207	20.33811938	8.102975342	18.67106836	-18.02663232
																			56	110.2436953	73.53947656	51.36116406	54.84523828	95.11584375		-6.989964844	20.12663232	8.649660156	17.95706348	-17.86964404
																			57	106.5302148	71.30558984	52.29555859	55.24855176	93.361125		-6.29616748	19.40427051	9.698345703	17.72305859	-18.34465527
																			58	102.3528594	69.01169922	52.45845313	55.18786621	91.32640625		-6.417245117	18.0880332	10.09903027	18.27305371	-18.98366602
																			59	98.62487891	65.47780859	52.2600957	55.09517578	88.96368359		-6.929572876	16.76504639	9.971715332	18.7590498	-20.00667773
																			60	95.26839844	62.69691992	51.65786523	54.47448926	87.08096484		-7.742025024	15.41880933	10.27240063	18.90904443	-20.65768945
																			61	90.74603906	61.85803125	50.91101172	54.38180371	85.05424609		-8.180603027	13.85857422	10.54508545	19.17104053	-20.16070117
																			62	85.91143359	62.44414063	50.1296543	54.46511719	83.40352734		-7.947055176	12.32271216	10.599771	19.22503516	-19.51171289
																			63	82.04182813	64.84625	49.41542383	54.24443066	82.54480469		-7.980258301	11.2493501	11.39245508	18.89503027	-18.59872461
																			64	78.81084766	68.44736133	49.21481836	54.90374414	81.71008594		-7.915210449	10.59261328	12.11714063	19.06102539	-17.38173633
																			65	75.92011719	71.88847266	49.46033594	55.80305859	80.73936328		-7.423788574	9.894251221	12.02382593	20.29902051	-16.22474707
																			66	73.49138672	74.45958203	50.02873047	56.17437207	79.30464453		-7.290990845	9.515640137	12.32851123	21.45701563	-15.0597583
																			67	72.15678125	75.35969336	51.3065	56.28968164	77.95792578		-6.98681897	9.419653076	13.04319678	21.73501074	-13.90277002
																			68	72.92455078	73.70180273	52.95289648	56.35699512	77.17120703		-6.429771118	9.235791016	13.67588184	21.43700684	-13.26178174
																			69	76.00019336	70.42391406	54.20241602	56.34430957	77.55248828		-6.682473877	9.354055176	13.86656641	21.36300195	-13.63279346
																			70	81.31808789	66.85502344	54.39243164	56.69962305	79.38976563		-7.423926514	10.09719312	13.54525073	21.48099707	-14.75980469
																			71	88.15035742	63.54513477	53.52570313	57.47093652	82.03504688		-7.74850415	11.74258105	12.69393604	20.97499219	-15.41481543
																			72	94.90625	60.53324414	52.63972266	56.93025098	84.72032422		-7.445581787	13.87221899	11.68862134	20.5169873	-14.84582715
																			73	100.4821445	57.39335547	51.69449414	56.10156445	86.08560547		-7.791784424	16.14285693	11.09530664	20.13898291	-14.96083887
																			74	104.2070391	55.00946484	50.89500977	56.00887793	85.97088672		-8.737111816	18.58974707	10.60999219	19.26497705	-15.87985059
																			75	105.3696836	54.01357617	50.8369043	55.1161875	84.77616797		-8.633814941	20.20975977	10.54467749	18.63097266	-16.3788623
																			76	103.9893281	53.64068555	50.75005078	53.63150195	83.05344531		-7.93939209	20.69727295	10.88536182	17.99696826	-17.12587402
																			77	100.4649727	53.80179688	50.02144141	52.57881543	81.47472656		-7.151844971	21.15778613	10.80204712	17.28296338	-17.96888477
																			78	95.29349219	54.3259082	49.25771289	51.44612891	79.64000781		-5.656547607	21.80879883	10.60673145	16.82495898	-18.94389648
																			79	89.87101172	54.43301758	49.39560742	50.02544238	77.87728906		-3.973250244	21.92106201	10.99341699	16.5909541	-20.5909082
																			80	84.80515625	53.78712891	49.90912695	48.41275684	76.05057031		-3.062952881	21.81532471	11.33610205	16.02094873	-22.35391992
																			81	79.58367188	52.38823828	49.49327148	46.59207031	72.99984766		-2.413905518	21.64208984	11.2807876	14.89094434	-23.44893164
																			82	74.79494141	49.93534961	48.46178906	45.39537988	68.97312695		-2.209733154	20.88560303	11.1974729	14.2249397	-24.23994238
																			83	70.25495898	47.11345898	47.60056055	44.59869434	64.6584082		-2.232310791	19.94899072	11.37815735	14.23093408	-25.0949541
																			84	65.91510352	44.88057031	46.57682813	43.54600781	60.9676875		-1.769513428	19.28162891	11.64884277	13.70892969	-25.82196484
																			85	62.89787305	42.71467969	45.19297266	42.60532129	58.15696875		-2.131216187	19.1577666	11.70952686	12.8349248	-26.95697656
																			86	59.91914453	40.42878906	43.66949219	41.31263477	55.66625		-2.844293823	19.3452793	11.4142124	12.82492041	-28.63198828
																			87	56.41891211	37.74689844	42.12600977	40.01994922	53.26352734		-3.11012146	19.20729492	11.33889771	13.05491602	-30.37499902
																			88	53.39918164	34.50200977	40.57940625	39.07926074	51.10080664		-2.631198853	18.97105762	11.71358301	12.35691064	-32.03001074
																			89	50.78244922	31.67312109	38.98954883	37.59457422	49.12208789		-1.795151611	18.67682031	11.58026831	11.38690576	-33.28102246
																			90	48.62384375	29.69823047	37.47819531	36.3658877	46.64736914		-0.75860437	17.7724585	10.86895386	10.73690137	-33.73203418
																			91	46.41286328	27.76934082	36.39408789	35.76120215	43.80465039		0.916818115	16.21322168	10.28163818	10.03889648	-33.8870459
																			92	44.12988086	25.80845117	35.46835742	35.47651367	40.76192871		1.355740479	14.79023584	10.17632251	9.596891602	-34.52605762
																			93	42.46227539	24.17956152	34.04737695	35.43182715	37.66320996		1.189412842	13.62612354	10.04700781	9.074887207	-35.42506934
																			94	40.95679492	22.55567188	32.95314648	34.6191416	36.27649023		1.549210205	11.96663672	9.637693115	8.424881836	-36.67608105
																			95	39.42068945	21.49478223	32.16316602	33.71045508	36.37776953		1.760757568	10.89365039	9.064378662	8.654877441	-38.1630918
																			96	37.59083398	21.32789355	31.12005859	33.1857666	35.5110498		2.230804932	10.34966357	8.269063965	9.172872559	-39.02610352
																			97	35.80260254	20.78400391	30.5477041	32.11708008	34.1723291		2.565727539	9.451051758	7.801748535	8.906867676	-39.58911523
																			98	34.81724707	19.56211426	30.08584766	30.87239453	32.65760938		2.285899902	9.21819043	7.588433594	8.416862793	-40.02812695
																			99	33.87401563	18.55622461	29.32936719	30.12370801	30.15089063		2.032697266	9.234453613	7.249119141	7.958858398	-40.29113867
																			100	32.59566016	17.85233496	28.50513672	29.43901953	28.07616943		2.132119629	8.907466309	7.333803711	7.644853516	-40.73814844
																			101	30.43005469	17.49344531	27.57990625	28.4663335	26.5694502		2.201041992	8.685854492	7.542489258	7.218848633	-41.56116016
																			102	27.74307227	17.20555566	27.0950498	27.73364697	24.93473096		2.069214355	8.701743652	7.439173828	6.456844238	-42.74417188
																			103	25.5457793	16.44566504	27.19194531	27.16096094	24.15600977		1.945386719	8.188256348	7.065859375	6.238838867	-43.62718359
																			104	23.46161133	15.82977539	27.10296387	26.41227295	24.00129102		2.063684082	7.254269531	6.664544434	6.036834473	-44.01019531
																			105	21.57569238	15.90388574	26.64673438	25.91958643	23.03057178		2.484981445	6.608032715	6.857229004	4.826830078	-44.66120703
																			106	19.89208691	15.39199609	25.86800293	25.45890039	22.11585059		2.959903809	5.778046387	6.893914551	4.160824707	-45.53221875
																			107	18.81135596	13.68910645	24.51164648	24.58221387	21.10513135		3.778451172	5.161435059	6.642599121	4.230820068	-46.00723047
																			108	18.20525049	12.01321777	23.22404102	23.76952588	18.51841211		4.593498535	5.223447754	6.931284668	4.10881543	-46.59824219
																			109	17.77776953	10.46432764	22.83968555	22.74883936	15.85969092		4.606920898	5.230336426	7.111969727	4.194810303	-47.08125391
																			110	17.36491357	8.912437988	22.75170508	21.52015332	13.6169718		4.684343262	5.006599121	6.754654785	4.216805664	-47.06026563
																			111	16.61180713	7.78654834	22.75172363	20.56346484	11.39825171		5.031765625	4.959987793	6.579339844	4.446801025	-47.86727734
																			112	15.88520117	6.904658691	22.90474316	19.91077881	9.763531494		5.071187988	4.550251465	6.736025391	5.060796143	-48.23828711
																			113	14.60728271	6.025769043	22.46176172	18.77809229	8.7928125		5.210360352	3.79476416	6.482709961	4.842791504	-47.84529883
																			114	13.09055225	4.926879395	21.48315625	17.64540527	8.382091797		5.635407715	3.141652832	6.047395508	4.064786865	-48.70031055
																			115	11.51557129	3.548989624	20.75642578	17.12071899	8.12337207		6.937330078	2.170791016	6.038080078	3.878781738	-49.78332227
																			116	9.404027832	2.471099854	19.81432031	16.27603174	7.400652832		8.702376953	0.952554199	5.980765137	3.164776855	-50.79033203
																			117	6.955609375	1.989210693	18.28308984	15.70334546	6.221932617		9.624549316	0.075317871	5.709450195	1.842772461	-51.90134375
																			118	3.95019104	1.608320923	17.5577334	15.3066582	4.691212402		10.48459668	-0.687669189	5.348135254	1.480767578	-51.92035547
																			119	0.691459961	1.099431152	17.26350293	14.42997217	3.360492188		11.98701904	-1.301405762	4.724820801	0.974762695	-50.99936719
																			120	-2.156208313	0.625541504	16.68789746	13.23328491	3.357772949		13.25956641	-1.087767578	4.457505371	0.516758301	-50.27037891
																			121	-5.044751587	0.225651733	16.38279102	12.54859863	3.451053223		13.69236426	-0.562629395	4.556190918	0.92275293	-49.90939063
																			122	-7.84629541	0.054762207	15.89518555	12.77591138	3.160333008		13.69153613	-0.390615723	4.126875488	1.216748535	-48.79640234
																			123	-9.411213623	0.126872437	14.88570508	12.3312251	3.34161377		13.56120996	0.085022217	3.425560547	1.366743652	-47.55141406
																			124	-10.13806934	0.304982788	13.49497363	11.83853784	3.634893555		13.32550684	0.900785645	2.956245605	0.97273877	-47.54642578
																			125	-10.62323779	0.443093262	12.04161816	12.11385156	3.33617334		13.41330469	1.383923828	2.770931152	0.146734375	-47.76943555
																			126	-11.02303174	0.613203491	10.8241377	11.73316431	2.645454102		13.80797656	1.757062012	2.879616211	-0.551270508	-47.60444727
																			127	-11.26038721	1.036313721	9.625032227	11.70447803	2.202734375		13.85852393	1.567325684	3.376300781	-1.345275391	-47.86345898
																			128	-10.84243066	1.175424316	8.563175781	12.53979102	2.288013672		13.79332129	0.848963867	4.160986328	-1.739280762	-48.2544707
																			129	-9.881474121	0.571534546	8.182570313	12.92710449	2.461292969		13.66924365	0.500102051	4.419671387	-1.669284668	-48.28548242
																			130	-8.926767578	-0.378355225	7.630339844	13.33041748	2.514574219		13.34904102	0.492365234	4.282356445	-1.807290039	-47.79649414
																			131	-7.600998291	-1.472244873	6.331858887	13.30173096	3.319854492		12.71683838	0.477628418	4.419041504	-1.817294434	-46.85950586
																			132	-6.674229492	-2.906134277	5.001878418	12.92104395	3.957134277		11.89926074	0.405641602	4.579726563	-2.051299316	-45.86251758
																			133	-7.117460449	-3.15302417	3.889022461	13.21235742	3.346415039		11.55880811	0.410030273	4.188411621	-2.989304199	-45.2775293
																			134	-6.419191162	-2.575913818	3.102541748	13.10367041	2.319694824		11.34048047	0.953793213	3.483096191	-4.10330957	-45.28454102
																			135	-4.79492218	-3.546803467	2.814311035	12.6429834	1.068974609		11.18727783	1.856806641	2.981781738	-4.657313477	-44.89555273
																			136	-3.864965752	-4.177693115	2.646955566	12.56629688	-0.445744141		11.0773252	2.084195313	2.688467285	-4.875318359	-44.66256445
																			137	-2.148946594	-3.860582642	2.601599609	12.68161084	-1.016464844		10.76149756	2.328833008	2.745151855	-5.381323242	-45.35357617
																			138	-0.13548999	-4.15247229	2.829619141	12.89292334	-1.01918457		10.09179492	2.31309668	3.213836914	-5.359328125	-45.88058594
																			139	1.327529114	-4.486362061	2.618137939	13.16823633	-1.405905273		9.317342285	0.856734619	3.670521973	-5.209333008	-46.01559766
																			140	2.408048218	-4.689251831	2.063907471	13.3795498	-1.128624023		8.628139648	-0.734501709	3.81720752	-5.619337891	-45.67060938
																			141	3.064942261	-4.565141357	2.036551758	13.25486279	-1.43534375		8.003937012	-1.623613525	3.733892578	-5.693341797	-44.69762109
																			142	3.711273804	-3.674031006	2.264696045	13.05017627	-2.518064453		8.296109375	-1.806225342	3.354577148	-5.607347656	-43.61263281
																			143	4.27673024	-2.502920776	2.055340576	12.97348926	-2.87278418		8.718281738	-1.867336914	2.833262695	-6.257352539	-43.09564453
																			144	4.770749664	-1.697810303	1.905484375	12.94480273	-3.835503906		8.816204102	-2.15494873	2.093947266	-7.387356445	-43.0626543
																			145	5.155456055	-1.250699951	1.814253662	12.51611572	-4.782223633		9.272126465	-1.407810303	0.994632568	-7.893361328	-42.63366602
																			146	5.29753772	-0.800589722	1.207648193	12.31142944	-5.144943848		9.289048828	-0.473171875	0.351317871	-8.639366211	-42.43267773
																			147	5.267431641	-0.351479126	0.463292236	12.90674219	-6.067663086		9.062221191	-0.353033936	0.518002686	-9.833371094	-42.31968945
																			148	5.581575928	-0.397368896	0.381811768	13.19805615	-6.830383789		8.915268066	-0.423395508	0.358687988	-10.19537598	-41.57070117
																			149	6.159344727	-0.800258667	0.621705688	12.52936865	-7.201103027		8.09494043	-0.83900708	-0.180627197	-11.00538086	-41.16571289
																			150	6.761364014	-0.680148315	0.445600098	11.62068262	-7.71582373		6.920237793	-1.151493896	-0.243941895	-12.77538477	-40.72072266
																			151	7.874320801	-0.392037842	0.234369385	10.69599561	-8.758542969		5.558160156	-1.055855469	-0.539256592	-14.06539063	-39.80373438
																			152	8.829839355	-0.44692749	-0.137111328	9.835309082	-10.23326245		4.062458008	-1.552092529	-0.944571899	-14.81139551	-39.01474609
																			153	10.01242139	-0.151817261	-0.678091797	9.118621826	-11.63598291		3.042130127	-1.841829102	-0.609886597	-15.12539941	-38.08975781
																			154	11.82562793	0.595293213	-1.059822754	8.401935059	-12.59070239		2.25205249	-1.452315674	0.024798218	-15.4554043	-37.02876953
																			155	12.82358447	1.00440332	-1.113053589	8.261248047	-13.18542261		2.133599854	-1.75692749	0.821483398	-15.73740918	-35.78778125
																			156	13.59191602	0.833513672	-1.278034302	8.888561523	-14.36414209		2.720772217	-1.807164063	1.284168701	-15.76341406	-34.81079297
																			157	14.24149756	0.624624268	-1.683014893	9.403875	-16.36686255		2.75406958	-1.405275879	1.224853516	-16.07741895	-34.86180469
																			158	14.1797666	0.505734497	-1.62887085	9.647187988	-17.80158197		2.835491943	-1.424387695	1.237538818	-16.10342383	-34.55281641
																			159	14.24434814	0.265844727	-1.85210144	9.874501465	-18.83630151		2.943039307	-1.707874512	0.708223633	-15.60142773	-33.69582813
																			160	14.19055518	-0.1630448	-2.426707275	10.66181445	-20.055021		2.63958667	-2.255361084	-0.283091064	-15.38743262	-33.43083984
																			161	13.78776123	-0.808934448	-3.078437988	12.18512793	-20.71374023		2.757759033	-3.081597656	-1.02440625	-15.84543848	-33.56585156
																			162	12.98978027	-1.242824219	-3.917668457	13.96444141	-20.87646167		3.020056396	-4.207334473	-1.677720947	-16.49544238	-33.89686328
																			163	11.54286182	-1.383713623	-4.846899414	15.56775439	-21.06318115		3.06310376	-4.688321289	-2.111035767	-16.50544727	-33.72387305
																			164	9.948756348	-1.317603394	-5.714880127	17.37906787	-21.16990259		2.826151245	-4.655057861	-2.232350952	-17.25145215	-33.04688477
																			165	8.992774902	-0.511493164	-6.00286084	18.75838086	-20.85262183		2.642323608	-4.958544678	-2.497665649	-18.30145703	-32.53389551
																			166	8.383231689	0.444617432	-5.713341553	18.72969434	-20.48734131		2.93724585	-5.09940625	-2.698980835	-17.84746191	-32.03690723
																			167	7.165000732	0.914727539	-5.824072266	17.59700732	-20.57006055		2.808793213	-5.141393311	-2.390295654	-16.9614668	-31.39191895
																			168	5.48883252	1.684837646	-6.671427979	15.69632031	-20.76478125		1.969965576	-5.303504639	-1.861610352	-16.2514707	-30.38293066
																			169	4.16778894	3.034948242	-6.480908447	13.76363379	-20.83150098		1.640263062	-5.390866211	-1.166925537	-15.49347559	-29.46194238
																			170	2.564495667	4.070058594	-5.647639648	12.08694678	-20.90622021		1.435435425	-5.670728271	-0.668240234	-14.84748145	-28.8889541
																			171	0.625327148	4.832168945	-6.060370117	10.41026025	-20.53294043		0.860232788	-6.169339844	-0.99755542	-14.52148535	-28.10796582
																			172	-0.83259137	5.178279297	-6.491351074	9.38957373	-20.78366016		0.751405273	-6.24432666	-1.322870117	-15.21949023	-28.07897754
																			173	-2.641259705	4.721389893	-6.465081787	9.040886719	-21.57038135		0.842327637	-5.962438232	-1.686184937	-16.17349512	-27.96198828
																			174	-3.766928028	4.441499756	-6.4578125	8.404200195	-21.94110059		0.927999878	-5.621800049	-2.445500122	-16.5835	-26.901
																			175	-4.383159088	3.862610352	-6.392293213	7.703513184	-22.85582031		1.433047241	-4.804661865	-2.384814819	-16.84950488	-26.47201172
																			176	-6.250265137	2.806720703	-6.198523926	6.970826416	-23.67453955		1.867719727	-4.434648438	-2.070130005	-16.97150977	-25.97102344
																			177	-7.80480835	2.095831055	-5.249879639	6.110139404	-23.71725879		2.06551709	-4.56651001	-1.943444702	-17.17351367	-24.95803516
																			178	-8.700039307	1.055941162	-4.971235596	5.553452881	-23.12797852		2.314439453	-4.317621826	-2.178759521	-17.61551855	-25.03304688
																			179	-9.847207764	-0.323948242	-5.993716064	5.492766357	-22.93869995		2.159986816	-4.036858643	-3.260074707	-17.84952441	-26.17205664
																			180	-10.93312598	-0.981837891	-6.851947021	5.784079346	-23.31741943		2.16278418	-4.042595459	-3.785389404	-17.45952832	-27.35906836
																			181	-11.67091943	-1.099727661	-7.347677734	5.963392822	-23.87213867		2.633581543	-4.634581787	-4.03270459	-16.5095332	-28.18208008
																			182	-12.44152515	-1.291617188	-7.702783203	6.270705811	-25.1468584		3.055128906	-5.329318604	-4.324019287	-15.83153809	-27.6770918
																			183	-13.09788184	-1.371506836	-7.229638916	7.138019531	-25.68557959		4.08392627	-5.69843042	-3.881333984	-15.60154297	-25.90410352
																			184	-13.3299248	-1.457396729	-6.031619873	8.213332031	-25.69629883		5.061223633	-5.577541992	-3.118649292	-15.64354785	-24.64311523
																			185	-13.98009277	-2.201286133	-5.170475464	8.440645508	-26.30701855		5.245270996	-5.135528809	-2.359963989	-15.82955273	-24.45012598
																			186	-14.71688672	-2.848176025	-4.741956299	7.99595874	-26.73373779		5.281943359	-5.212015381	-2.233279175	-16.07955664	-23.9291377
																			187	-15.43743018	-2.770065674	-4.812812012	8.191271973	-26.84045752		4.874865723	-5.485877441	-2.396593994	-16.23356152	-23.49214941
																			188	-16.22572314	-2.968955078	-5.788292603	8.402584961	-27.02717871		4.537913086	-5.417489014	-2.073908691	-16.22756738	-23.80316113
																			189	-16.65395459	-3.286844727	-7.515648438	8.693898438	-27.18989795		4.548585449	-5.120350586	-1.803223877	-16.38157129	-23.92617285
																			190	-17.57662256	-3.126734497	-9.562754395	9.481211914	-26.92061768		4.331382813	-4.432712402	-1.674538574	-16.71157617	-24.30118457
																			191	-19.13116699	-2.756624146	-11.04985986	10.1885249	-26.43533691		4.408305176	-3.908698975	-1.37185376	-16.60958105	-24.26419629
																			192	-20.55064746	-2.617513916	-11.41871533	11.10383838	-25.83805859		5.177227539	-3.612686035	-0.709168457	-16.33158594	-24.19520703
																			193	-21.71175293	-2.412403442	-10.97207178	11.89115088	-25.04877783		5.934149902	-3.108047607	-0.002483643	-15.94159082	-24.93021777
																			194	-23.28335938	-1.962292969	-10.08542725	11.65446484	-24.23549756		5.807822266	-2.63740918	0.51620166	-15.2635957	-25.44522949
																			195	-25.14096484	-2.120182739	-9.155783203	10.71377783	-23.2382168		5.350744629	-2.119770996	1.220886963	-14.90559961	-26.58824121
																			196	-25.96513281	-2.77207251	-8.934138672	9.469091309	-22.39293604		5.097166992	-1.381507568	1.969571899	-15.07560449	-27.70325293
																			197	-26.33186426	-3.506962036	-9.552994141	8.368404541	-22.44365576		4.729964355	-0.721869385	2.176256958	-15.58161035	-28.06626465
																			198	-27.3602207	-4.043851807	-10.38709961	7.459717773	-22.86237695		4.403011719	-0.775855957	1.378941772	-15.97561426	-28.50527539
																			199	-28.38551367	-4.427741455	-11.53170557	5.767031006	-23.27309668		4.227559082	-1.346968018	0.677626953	-16.36961914	-28.64428711
																			200	-28.80749512	-5.785630859	-12.67968652	4.570344238	-24.49181787		4.116606445	-1.85332959	0.746312256	-16.92362402	-28.41929883
																			201	-28.96710059	-7.536520752	-13.64154199	4.189657471	-25.75853711		3.793278809	-1.935940918	0.57699707	-17.47762891	-28.79031055
																			202	-29.55151855	-8.4534104	-14.32652344	3.600970703	-26.25725684		3.659951172	-1.587302979	0.405682373	-17.63163379	-29.84932227
																			203	-30.1621875	-9.080300293	-14.32750293	3.060283813	-26.85197607		3.477123535	-1.153789551	0.782367188	-17.38563867	-30.17233398
																			204	-30.65285547	-9.529189941	-14.29048486	2.631597076	-27.1026958		2.263545898	-0.299526123	1.71105249	-17.57164355	-30.38334473
																			205	-31.22777344	-9.133079346	-14.69559033	2.602910538	-26.84141504		1.231218506	1.039986816	2.683737549	-17.72564746	-31.01835645
																			205	-31.93362988	-9.30296875	-15.6370708	3.166223511	-26.38013623		0.657765991	1.917625244	2.982422607	-17.46365332	-31.38136719
																			205	-32.93936133	-10.23685889	-17.07255176	3.441536957	-25.72685596		0.354688354	2.350013428	2.86910791	-17.3296582	-31.78437891
																			205	-33.4249668	-10.59974829	-18.38103223	3.188849945	-25.7615752		0.961610718	2.512401855	2.967792969	-17.05166211	-32.20739063
																			205	-33.70232227	-11.06463867	-19.15363867	2.584163391	-26.56429492		1.275157837	2.238415283	3.252478027	-16.40566699	-32.17040234
																			205	-33.84836523	-11.06652734	-19.77161865	1.131476624	-27.24701611		0.850580444	2.583803223	2.749162842	-16.20767285	-32.01341406
																			205	-34.10984766	-10.40141699	-20.23022412	-0.513210205	-27.76173535		0.266627808	3.37531665	1.9178479	-16.80967676	-32.21642578
																			205	-35.06476563	-10.01030664	-20.14545605	-1.757896973	-27.51645508		-0.044449829	3.70957959	2.042533203	-17.41168164	-32.0234375
																			205	-35.34974805	-10.01019629	-19.91718652	-3.08258374	-26.58317432		0.403722534	3.863593262	2.589218018	-17.88568652	-31.51044922
																			214	-35.13810352	-10.32508643	-20.62166699	-4.647270508	-26.15389404		0.87364502	3.444106934	2.84390332	-18.50369141	-31.54145898
																			215	-35.15358398	-10.75697607	-22.11014844	-5.667957275	-25.77261328		0.732692383	2.574994629	2.986588379	-18.88169629	-31.9404707
																			216	-35.34931445	-11.68186572	-23.23725293	-6.288643799	-25.37533447		0.310864624	2.144133301	3.285273438	-18.9237002	-32.35948242
																			217	-35.49523242	-12.46275537	-23.90435938	-6.525330811	-25.1620542		0.161787109	2.449146484	3.479958496	-19.10970605	-32.76249414
																			218	-35.27808789	-12.20064551	-24.62733984	-5.690017334	-24.68477539		0.117334473	3.117159668	3.672643799	-19.26370996	-33.11750586
																			219	-35.33219531	-11.92953467	-24.33557031	-5.254704102	-24.26349512		0.347756836	3.683672852	3.935328613	-18.96971484	-33.74451758
																			220	-35.56948828	-12.08042432	-23.17455078	-6.227390869	-23.93021436		0.997679199	4.637311035	4.554013916	-18.8997207	-34.51552832
																			221	-35.32409375	-11.70731396	-22.89290625	-7.648077881	-23.50893359		1.512976563	5.694450195	5.53669873	-19.35772461	-35.35854004
																			222	-35.12751172	-11.03220313	-22.7201377	-8.268764648	-22.99965332		1.772273926	5.861712891	6.075384155	-19.91172852	-35.64155078
																			223	-35.38430469	-10.49009277	-22.80749316	-7.737451172	-22.30637256		1.654446289	6.097726074	6.960068848	-19.95373438	-35.42856348
																			224	-35.60972266	-10.02698267	-24.00184961	-6.966138184	-22.46909229		1.164993652	6.78098877	8.058754395	-19.56373926	-35.5835752
																			225	-35.30976758	-9.90687207	-25.61145508	-6.226825195	-23.71981348		0.331166016	6.78762793	8.389439209	-19.71774219	-35.51058691
																			226	-34.82949805	-10.09276172	-26.91681055	-5.647511719	-25.13053271		-0.399911621	6.813141113	8.368124023	-20.30375	-35.34159863
																			227	-34.93454102	-10.18365186	-27.19966602	-5.468198242	-25.86925391		-1.406989258	6.838903809	8.652809326	-20.60175391	-34.3686084
																			228	-34.55896094	-10.4125415	-26.88877246	-5.656885254	-25.93597363		-1.987566895	5.89804248	9.053494873	-20.57975781	-32.81162012
																			229	-33.75650391	-10.62043164	-26.38175293	-6.229571777	-25.85069336		-1.542394531	4.845930664	8.972179688	-20.81376367	-31.97063281
																			230	-34.02067383	-10.23032129	-25.3184834	-6.546258789	-25.1494126		-1.522347168	4.428069336	8.896864502	-21.22376758	-30.86164355
																			231	-34.4784043	-9.914210938	-24.24483887	-6.526945313	-24.35213232		-1.396924805	4.40095752	8.585549805	-21.39377148	-30.05665527
																			232	-34.00532227	-9.620100098	-23.45794531	-5.81963208	-24.29085156		-1.333877441	4.894595703	8.104234863	-21.35577734	-30.62766699
																			233	-33.84567773	-9.419989746	-23.64555078	-4.71231897	-24.8295708		-2.021330078	5.319358887	8.112919434	-20.96578125	-31.49067773
																			234	-34.2959707	-9.471879395	-24.97290723	-3.589005737	-25.80829248		-2.426532715	4.688372559	8.16360498	-20.65578516	-32.84968945
																			235	-34.46307617	-9.154769043	-25.6770127	-2.289692505	-27.01901172		-2.736860352	3.494885742	7.906290283	-20.77779297	-34.56070117
																			236	-34.84674512	-9.232658203	-25.46036816	-1.58237915	-28.24573145		-3.328562988	2.255898682	8.442975098	-21.29979688	-35.06771289
																			237	-35.05028906	-9.91454834	-25.33497363	-1.019065918	-29.18445313		-3.564265625	1.161162354	10.02166016	-21.91780078	-34.87872461
																			238	-34.84289453	-10.13443799	-24.9632041	-0.359752747	-29.64317188		-3.396343262	0.483175781	10.98434521	-22.15180664	-34.40573633
																			239	-34.6139375	-10.09432764	-24.17918457	0.363560501	-29.7178916		-3.483920898	0.192938721	11.26103076	-22.33781055	-33.59674609
																			240	-34.30804395	-10.29521729	-23.94754102	1.31087384	-29.45661133		-3.865498413	-0.286798096	11.74571533	-22.23581445	-32.90775781
																			241	-34.22102441	-10.46310742	-23.64852148	1.554187042	-28.81133008		-4.299576172	-0.675159668	12.51640039	-21.63782031	-32.30276953
																			242	-34.22087988	-10.76299683	-23.09025293	0.693500259	-28.55005176		-4.769153809	-0.695771484	12.68508594	-20.73582422	-32.06578125
																			243	-34.42804883	-11.13788672	-23.6243584	-0.375186523	-28.78477148		-5.365856445	-0.974257813	12.84177051	-19.2418291	-32.60879297
																			244	-35.0474668	-11.17077588	-24.50908887	-1.347873291	-28.80349023		-6.183308838	-1.004494873	13.33245605	-18.21183398	-33.11980469
																			245	-35.09663477	-11.16066553	-24.71556934	-2.368560059	-28.71820996		-6.570011475	-0.681106445	13.42314063	-18.55783887	-32.73081641
																			246	-34.78480469	-11.11755518	-24.50780078	-2.925246887	-29.00093164		-6.662964111	-0.818968262	13.50782617	-19.65584375	-32.14982813
																			247	-34.72966113	-10.91644482	-24.17590625	-3.257933594	-29.17965137		-6.995041748	-1.096705078	13.39651123	-20.67384961	-31.82083984
																			248	-34.6276416	-10.82933447	-24.02063672	-3.862620483	-28.82237012		-6.874369385	-1.559191528	13.1371958	-21.16385352	-31.71985059
																			249	-34.07487305	-10.32322437	-23.42361719	-4.419307007	-28.74508984		-6.445572021	-2.497053223	13.18788135	-21.26985742	-31.2628623
																			250	-32.98729102	-9.38311377	-22.40134766	-4.351994019	-28.60380859		-6.664774658	-2.921915039	13.43056592	-21.27986328	-30.50987402
																			251	-32.24745898	-8.786003418	-22.2124541	-4.316680542	-28.26253027		-6.973352295	-2.841151733	13.69925146	-21.33786719	-31.04088574
																			252	-31.92881445	-8.327893555	-22.80405957	-4.425367432	-28.05725		-7.047679932	-2.942638672	14.18793652	-21.26787109	-31.63189551
																			253	-31.8066709	-8.092783203	-23.48466602	-4.406054199	-27.68396973		-7.395007568	-2.903125	14.45862158	-21.19787891	-31.13090723
																			254	-31.98708887	-8.329672607	-23.90739648	-4.962740845	-27.43069043		-8.074210205	-2.708361816	14.45330615	-21.54388281	-30.73791895
																			255	-31.78719531	-8.604562256	-24.46937695	-5.663427734	-26.88141016		-8.416787842	-2.835348633	14.8259917	-21.96988672	-30.28893066
																			256	-30.98317578	-8.80545166	-24.72385742	-5.676114502	-25.73212988		-8.522740479	-3.096335449	15.37867676	-21.99589258	-29.98794238
																			257	-30.35434375	-8.888341309	-23.60396387	-5.43280127	-24.81484912		-9.239317871	-3.523072266	15.7773623	-22.00589648	-30.0149541
																			258	-29.6853877	-8.697230957	-22.56094434	-5.733488037	-24.78556836		-9.556895508	-4.077808594	16.19204639	-21.80790039	-29.85796582
																			259	-29.13193164	-8.666120605	-22.3944248	-6.162174805	-25.03628809		-9.731348145	-4.34329541	16.47473145	-21.67390625	-29.51697754
																			260	-29.36885059	-8.56901001	-22.25728125	-6.670861328	-25.86300732		-10.15555078	-4.628407227	16.43541699	-21.85991016	-29.36798926
																			261	-29.31045605	-8.288900146	-22.33613574	-7.46754834	-27.14572852		-10.12962842	-5.041519043	16.80610205	-21.66191406	-29.22700098
																			262	-28.73362402	-8.353789795	-22.79149219	-8.120234863	-27.41244824		-10.42083105	-5.071505615	17.42478711	-21.62392188	-28.91801172
																			263	-28.66998047	-7.887679199	-23.54434863	-8.692921387	-27.44716992		-10.56503369	-4.545617188	17.41147266	-21.52192578	-29.18102344
																			264	-28.78983594	-7.510569336	-24.1337041	-8.577608398	-27.45788867		-10.32123633	-3.842729004	17.3241582	-21.14792969	-29.79603516
																			265	-28.63687891	-7.751458984	-24.13305957	-8.30229541	-27.2126084		-10.06118896	-3.53971582	17.64884277	-20.98193555	-30.02704492
																			266	-28.53936035	-7.608348633	-23.49191504	-8.810982178	-26.69532813		-9.364516602	-3.264077393	17.73352832	-21.10393945	-29.69005664
																			267	-28.40396582	-7.649238037	-22.61264551	-9.447668457	-26.11404688		-8.653344238	-3.694939209	17.93021191	-21.99394336	-29.21706836
																			268	-28.20519727	-7.745127686	-21.98462695	-9.892355469	-26.28476758		-7.874422119	-5.378925781	18.80689746	-22.37194922	-28.80008008
																			269	-28.27799121	-7.54001709	-21.30148145	-10.22504248	-25.91148633		-7.212374756	-6.499912598	19.51358203	-22.31795313	-27.7150918
																			270	-28.41247168	-7.192906738	-20.65008789	-10.493729	-25.21020703		-7.279452393	-7.259274414	19.30626758	-23.03195703	-26.99010352
																			271	-28.15738965	-6.675796631	-20.47619434	-10.49041553	-24.97292676		-7.570030029	-7.876010742	18.90895313	-23.34596484	-27.29711523
																			272	-27.59905859	-6.960686523	-21.10792383	-10.21510254	-24.71964746		-7.820857666	-7.835872803	18.86163867	-23.75596875	-27.28012695
																			273	-26.97116406	-7.327575928	-22.32040625	-9.363789307	-24.69836719		-8.254310303	-7.401109375	18.97032373	-24.72597266	-27.69513867
																			274	-26.06239453	-7.304465576	-22.80101074	-8.20847583	-24.53308594		-8.390887939	-6.646220947	19.24700879	-24.78397852	-27.79015039
																			275	-25.01662598	-7.74135498	-22.51299219	-8.189162842	-24.25580664		-8.732340332	-6.118958008	19.02169336	-24.52198242	-26.35716113
																			276	-24.02248242	-7.602245117	-22.16272266	-8.969849854	-24.06652637		-9.615667969	-5.20319458	18.43837842	-25.20398633	-25.16417188
																			277	-23.16515039	-7.080134766	-21.06857813	-10.53453662	-23.70924658		-10.12899561	-4.229306396	17.87906299	-25.67799219	-24.30718359
																			278	-22.60244434	-6.952024414	-19.63455859	-12.54722314	-23.24796631		-10.75632324	-3.412293091	17.37174805	-25.20799609	-24.32619531
																			279	-22.4284873	-6.782913818	-19.02541406	-13.55191016	-22.70668652		-11.30552588	-2.186529541	17.56043359	-24.946	-25.40520703
																			280	-22.33609277	-6.268803467	-18.30877148	-13.80459668	-21.97340576		-11.56560352	-1.913891357	18.44711865	-24.78000781	-26.23621875
																			281	-21.91776172	-5.396692993	-17.26912549	-13.88128369	-21.36012646		-11.35280615	-2.734253174	18.78380371	-24.48601172	-27.52322949
																			282	-21.69099219	-5.516582642	-16.89648242	-14.35797021	-21.0428457		-10.89363379	-3.38836499	18.78248926	-24.76801563	-28.12224121
																			283	-21.17984863	-6.078472168	-17.11296191	-15.63465723	-20.98956543		-11.18646094	-3.35072644	19.42517383	-24.89002148	-27.17725293
																			284	-20.9447041	-5.935362183	-17.43694336	-16.76734424	-21.46428516		-11.33291406	-3.538713257	19.16985938	-24.82002539	-26.28026465
																			285	-22.04099805	-6.099251831	-17.53467432	-17.51603027	-21.79500488		-10.79036621	-4.634324951	18.53054395	-25.1180293	-25.70727637
																			286	-22.42760449	-6.216141846	-17.79402979	-17.92871729	-21.50172559		-9.309194336	-5.091936768	19.13722949	-25.32003516	-25.27828809
																			287	-21.72289746	-6.106031372	-18.32926074	-17.5894043	-21.22444482		-7.922396973	-4.66192334	19.53391406	-25.09003906	-24.85729883
																			288	-21.24487793	-6.130921021	-18.21236621	-16.99408984	-21.04316602		-7.943599609	-3.951909912	19.46059961	-24.73204297	-24.45231055
																			289	-21.12279688	-6.383810547	-17.58297168	-16.79877734	-20.73388477		-7.879552246	-2.608521729	19.89928418	-24.95005078	-23.97132227
																			290	-21.18115234	-6.957700195	-17.27170215	-16.81146484	-20.19260498		-7.591379883	-1.561133545	20.31196973	-24.99205469	-23.29833301
																			291	-21.14144531	-6.768589722	-16.57543408	-16.56815088	-19.43532471		-7.920332275	-1.175245361	20.1586543	-24.66605859	-22.73334473
																			292	-20.48286426	-6.081479248	-15.36516357	-16.50083838	-19.01404395		-7.902034912	-0.600106934	20.46333984	-25.28406445	-22.70435645
																			293	-19.54115723	-6.034368896	-14.57464453	-16.75352441	-18.70476465		-7.583987549	0.179531006	21.93402441	-26.20606836	-23.11136719
																			294	-19.67245117	-5.682258545	-14.04525049	-16.60621191	-18.52348389		-7.390565186	0.417919678	23.30870996	-26.40807227	-23.74637891
																			295	-19.92193262	-4.811148438	-13.54923096	-15.91489795	-18.8142041		-6.950017822	0.123183105	24.01539551	-26.78607813	-24.46139063
																			296	-19.48847559	-4.194038086	-13.44421191	-15.43158496	-18.84092383		-6.491095459	-0.047303955	24.50008008	-27.08408203	-24.10840234
																			297	-19.10708105	-3.667927734	-13.25519287	-15.74827148	-18.93964404		-6.390423096	-0.197415527	24.65276563	-26.77408594	-23.30341406
																			298	-18.59875	-3.459817139	-12.45917334	-16.6089585	-19.23836377		-6.282750977	-0.4047771	23.97944922	-26.32009375	-23.03442578
																			299	-18.43348047	-3.920707031	-11.9817793	-16.94164453	-18.89708398		-6.061203613	-0.700763916	23.21813477	-26.42609766	-22.1134375
																			300	-18.69564844	-4.288596802	-11.64088477	-16.84233154	-18.52380371		-5.906531006	-1.064625488	22.87282031	-26.43610156	-21.36844824
																			301	-18.52381738	-4.44648645	-10.96299072	-16.87101855	-18.49452295		-5.691608887	-1.217737305	23.00550586	-26.11010742	-21.65545996
																			302	-18.22023633	-4.726375977	-10.10409619	-16.70770557	-18.16924316		-5.635686279	-1.594474121	23.72819141	-26.10411133	-21.74647168
																			303	-18.3005918	-4.385265503	-9.249452148	-16.4643916	-18.20396289		-5.605013916	-1.531585938	24.100875	-25.95411523	-22.05348242
																			304	-18.73688574	-3.894155396	-9.042933105	-16.0290791	-18.42268311		-6.096591553	-0.77782251	24.29556055	-25.85212109	-22.69649414
																			305	-18.77730371	-3.433044922	-9.393788818	-15.44976611	-18.46540283		-6.947794189	-0.408184082	24.17024609	-26.262125	-22.85950586
																			306	-18.31847266	-2.952934692	-10.09664453	-15.20645313	-18.84412305		-7.02162207	-0.293421143	23.78893066	-26.30412891	-23.2145166
																			307	-17.97707813	-3.054824341	-10.5265	-14.35513965	-18.55084229		-6.714074463	-0.448032715	23.91161621	-25.59413672	-23.18152832
																			308	-17.71449609	-3.637713867	-10.57060547	-13.35982617	-17.96156299		-6.1837771	-0.159394287	24.28830078	-24.99614063	-22.49254004
																			309	-17.78522754	-4.116603394	-10.86483643	-12.89251318	-17.66028223		-5.351854858	0.409993896	24.73498633	-24.43014453	-22.70355176
																			310	-17.99433301	-4.084493286	-11.45644238	-12.72919971	-17.03100195		-4.515307495	0.092882324	25.3556709	-23.72015039	-22.82656348
																			311	-18.01693945	-3.883382813	-11.63267285	-12.80588623	-16.72972217		-3.601635132	0.083770752	26.14235645	-23.3141543	-22.3455752
																			312	-18.0787959	-3.399272705	-11.00427881	-13.05857324	-16.24444141		-2.935337646	0.335658691	26.99104199	-22.9401582	-22.53258594
																			313	-18.17827637	-2.821162109	-10.54250928	-13.56725977	-15.66316211		-3.108290405	0.540047119	27.77572656	-22.75816406	-23.23959766
																			314	-17.76394434	-2.075051758	-10.97348975	-13.85194678	-16.13788135		-3.075243164	1.445935059	28.34841113	-22.40016797	-23.7866084
																			315	-17.69467529	-1.20294165	-11.18509619	-14.1206333	-16.48460205		-2.739695801	1.85769873	28.84109766	-21.94617188	-24.11762012
																			316	-18.41778125	-0.974831055	-11.01070215	-14.26132031	-16.15932129		-3.377022949	1.756211914	29.41378125	-22.38817969	-23.66463184
																			317	-18.58101172	-1.222720703	-11.83755762	-13.93800684	-16.05804053		-3.613850586	1.972100098	30.43446777	-23.26218359	-22.35564355
																			318	-18.41243018	-1.925610596	-12.46478809	-13.79069385	-15.83676123		-2.888053223	2.45823877	31.32315137	-24.1361875	-21.61865527
																			319	-18.57591113	-2.952500122	-12.35814355	-13.83538037	-15.86348047		-2.122381104	3.029251465	31.69783691	-24.94619336	-21.34966602
																			320	-18.75158008	-3.467389648	-12.56187451	-13.92806689	-16.54620117		-1.242708618	3.797140137	32.06252246	-24.94019727	-20.81267773
																			321	-18.15156152	-3.589279541	-13.18735498	-14.32475391	-16.84492041		-0.177161255	4.91427832	32.18320703	-24.23020117	-20.37968945
																			322	-17.20460449	-3.421169067	-14.23296143	-14.76944043	-16.85564063		0.657261108	5.935541504	32.47989258	-23.21620703	-20.33470117
																			323	-16.72533545	-2.90505896	-15.00156641	-14.68612744	-17.25036035		0.571308472	7.244055176	33.43057617	-22.42621094	-19.92171289
																			324	-15.94681641	-2.601948486	-15.14942236	-14.57081396	-17.74108057		-0.437269165	8.228817871	34.25326367	-22.53221484	-19.33672461
																			325	-15.40179688	-2.139838135	-14.27152881	-14.91950098	-17.58380029		-1.491471924	8.685707031	34.90594629	-22.68622266	-19.48773535
																			326	-15.55359033	-1.434727661	-13.47475928	-15.1721875	-16.75451953		-1.901049561	8.822344727	35.61863379	-22.68022656	-19.41074707
																			327	-15.57875879	-0.785617432	-13.42036475	-14.99287451	-15.65323975		-2.226252075	8.46260791	35.75531738	-23.13823047	-18.93775879
																			328	-15.81961523	-0.441507202	-13.1233457	-14.95756104	-15.02396045		-2.573329712	8.64462207	35.96400195	-23.24423633	-17.76877051
																			329	-16.14653369	-0.438396606	-12.86270117	-15.56224756	-15.09867969		-2.186407349	8.949384766	36.2306875	-23.44624023	-15.80378223
																			330	-16.23813965	-0.341286377	-12.53130664	-16.42293457	-15.02139941		-1.575484985	9.126022949	35.90337305	-24.41624414	-14.75479346
																			331	-16.31049512	-0.332176147	-11.90291211	-17.02762158	-14.32011865		-1.1484375	9.513410645	35.58405859	-24.39425	-14.29780518
																			332	-15.83897607	-0.484065552	-11.70251855	-17.08830762	-13.30683887		-0.813140137	9.248174805	35.18074316	-24.18025391	-14.26881689
																			333	-15.11320703	-0.490955322	-11.86212451	-16.62099463	-12.26955957		-1.098092773	8.702312988	34.50942871	-24.20625781	-14.61582813
																			334	-15.17675049	-0.332844971	-11.27135498	-16.15368164	-10.71227881		-1.65454541	7.937326172	34.2981123	-23.59226563	-14.03883984
																			335	-15.05941846	-0.624734619	-11.26846094	-16.21436865	-9.266999023		-2.580998047	7.281464355	34.0387998	-23.01026953	-13.52585059
																			336	-14.2225874	-1.164624268	-11.58144141	-16.38705566	-8.88571875		-4.168700806	7.361727539	33.62348242	-22.18827246	-12.76486182
																			337	-13.97031836	-1.196513916	-10.96804736	-16.51174219	-9.056438721		-5.56340332	6.902991211	33.40016992	-21.3502793	-10.88387354
																			338	-13.91929883	-1.247403564	-11.61352783	-17.00442871	-9.619158691		-6.386230957	6.492129395	32.66885352	-20.6082832	-9.70688501
																			339	-13.80165527	-1.524293213	-12.28113379	-17.19311621	-10.15787866		-6.850433594	6.376892578	32.30353809	-20.37828711	-9.725896729
																			340	-14.01238623	-1.420182983	-11.56948926	-17.18980225	-9.920598633		-7.35363623	5.288030762	32.14622363	-20.64429297	-10.2609082
																			341	-13.8533667	-1.159072632	-11.28521973	-17.49048926	-9.459317871		-7.865213867	4.439168945	31.61090918	-20.60629785	-11.28791992
																			342	-13.61734766	-1.272962158	-11.41220068	-17.19917627	-9.350037598		-8.443416504	4.791307617	31.14959473	-20.76030371	-11.35893066
																			343	-13.83020361	-1.766851929	-10.89093164	-16.3158623	-9.264757813		-9.111119141	5.264695801	30.26627832	-20.91430762	-10.22994238
																			344	-13.30243408	-2.397741577	-9.733537109	-15.51254932	-9.283478027		-9.653196777	5.380083984	29.26696387	-21.19631152	-9.548954102
																			345	-12.43110254	-2.487631104	-8.977893066	-15.20523633	-9.590197754		-10.16114941	4.839222656	28.79364941	-21.36631836	-8.955965576
																			346	-12.74245947	-2.499520996	-8.615623779	-14.94592285	-9.67291748		-10.31522705	4.288735352	28.42033496	-21.44032227	-8.014977173
																			347	-13.03287793	-2.897410522	-8.578604492	-14.28660986	-9.571637451		-10.11905469	3.935124023	27.63101855	-21.80232617	-7.393988708
																			348	-13.0164834	-3.016300171	-8.931584961	-13.70729639	-9.766356934		-10.27725732	2.849762207	26.6917041	-21.39633203	-6.616999756
																			349	-13.44033936	-3.279189941	-9.456440918	-13.3839834	-9.433077393		-10.34845996	2.030650391	25.62238965	-21.27833594	-5.920011353
																			350	-13.72307031	-3.43907959	-9.859546387	-13.26866992	-8.843796875		-9.977412598	2.275289063	24.59507422	-21.33634082	-6.499022919
																			351	-14.35117578	-3.431969116	-9.935777344	-12.88135693	-8.878516602		-10.04036523	2.686926758	23.87175977	-20.81834668	-7.566034546
																			352	-14.96390674	-3.846858887	-10.0772583	-12.70204346	-8.937236328		-10.29106787	2.50406543	23.25044531	-20.41235059	-9.033046143
																			353	-14.8005127	-4.624748535	-9.56123877	-13.13072998	-8.467956543		-10.32877051	2.303703613	22.57913086	-19.59035449	-10.47605762
																			354	-14.67836816	-5.367637939	-8.561469482	-13.25541699	-8.078676758		-10.84172314	2.175716797	21.68381445	-19.00836035	-10.25906934
																			355	-14.1597876	-5.864527588	-8.151825195	-12.85210352	-8.425395996		-11.89830078	1.868230469	21.3645	-19.00236523	-9.774080811
																			356	-13.31645557	-6.389417725	-8.347056152	-12.43279053	-8.100116211		-12.50712842	1.365993164	22.00518457	-18.75636914	-9.257092285
																			357	-13.06006201	-6.150307251	-8.774787109	-11.62947705	-6.822835938		-12.41920605	0.283381836	22.01187012	-18.382375	-8.444103271
																			358	-12.75222998	-5.702196777	-9.252267578	-11.03416431	-6.073556152		-11.7785332	-0.75097998	21.24455469	-18.04037891	-8.41911499
																			359	-11.79514844	-5.509086426	-9.577123047	-10.98285083	-5.492275635		-10.47036133	-1.178966797	21.06724023	-17.79438379	-8.446126465
																			360	-11.15631689	-5.042975952	-9.549103516	-10.94753784	-4.790995483		-9.901438965	-1.472703125	21.09192578	-17.75638867	-8.617138184
																			361	-11.14254785	-5.264865723	-9.586459473	-11.21622437	-4.969715454		-9.614766602	-1.794064941	20.39261133	-17.52639355	-9.05614917
																			362	-10.53190381	-5.792755371	-9.782940918	-11.16491138	-5.404435303		-8.894094238	-2.287051758	19.5732959	-16.57639746	-9.511160645
																			363	-9.524884766	-6.19564502	-9.873546387	-10.5375979	-5.967155273		-9.330296875	-3.429038574	18.89198047	-15.25840234	-10.21017236
																			364	-9.197052979	-6.818534668	-9.979151855	-9.910284424	-6.513875244		-9.943874023	-4.299275391	17.69266504	-13.9404082	-10.27318408
																			365	-9.70159668	-7.209424316	-10.22250732	-9.170971436	-6.204594971		-9.952702148	-4.418261719	16.33135107	-12.97441211	-10.10019531
																			366	-9.936640137	-7.260313965	-10.78236328	-8.463657959	-6.415314697		-9.859904297	-4.563123779	15.09403613	-11.99241699	-10.28720703
																			367	-9.28443335	-7.216203613	-11.31209424	-8.524344971	-6.146034668		-9.825857422	-4.643860352	13.94272119	-10.67442188	-10.11821875
																			368	-9.127289063	-7.247093506	-11.1970752	-9.177031494	-5.060754395		-9.76705957	-4.707097168	13.20740576	-10.04442676	-9.801230225
																			369	-9.13827002	-6.99798291	-10.89605566	-8.837718506	-5.103474365		-9.016887695	-4.83870874	12.67809082	-9.862431641	-9.536241699
																			370	-8.466876221	-6.443872559	-10.50953613	-7.778405151	-5.074194336		-8.482089844	-5.102695313	11.95277637	-9.536436523	-9.663253174
																			371	-8.074857056	-6.260762329	-10.1135166	-7.487092163	-4.900914185		-7.972667725	-5.763807129	11.39946143	-9.17844043	-10.00226416
																			372	-7.934400391	-6.1486521	-9.577998047	-7.259778687	-4.743634155		-7.160245361	-6.500668945	11.52614648	-8.516445313	-9.673275879
																			373	-7.866381226	-6.098541748	-8.737103516	-6.10446521	-3.490354126		-7.031572998	-7.389280518	12.13483105	-8.014451172	-9.252287354
																			374	-7.940924927	-6.660431396	-8.231334229	-4.581152283	-2.08507373		-7.186025635	-8.536892578	12.7215166	-7.320455078	-9.14729834
																			375	-8.126468262	-7.357320801	-8.021064941	-3.64983905	-1.439793701		-7.189978271	-9.372753906	12.62820166	-5.890459961	-9.142310059
																			376	-8.118324097	-7.683210449	-7.956920898	-3.598525818	-1.20251355		-6.877055908	-9.853490723	11.59888672	-4.524464844	-8.877321777
																			377	-7.729492432	-7.770100098	-7.901526611	-3.979212616	-1.157233398		-5.741633545	-10.55410254	9.833571777	-3.286469727	-8.412333008
																			378	-7.408848633	-8.140990234	-7.815257324	-4.263899384	-2.087953247		-3.968336182	-10.88233887	7.988256592	-1.520474609	-8.439344727
																			379	-7.22770459	-8.478879883	-7.704362793	-4.452586426	-3.314673096		-3.162663818	-10.52957617	7.298941895	0.101520508	-8.818356445
																			380	-6.980435303	-8.175769531	-7.836093506	-3.953272949	-3.845393066		-3.515741455	-10.1939375	7.061626953	1.163516113	-8.737367676
																			381	-6.467603516	-7.77265918	-8.443574219	-3.229959503	-4.128112915		-3.794444092	-10.16129932	6.574312012	2.11351123	-8.316379395
																			382	-5.914771973	-7.65754834	-8.778055176	-3.642646545	-4.090832642		-4.292146729	-10.42528613	6.546997314	3.111506348	-7.975390869
																			383	-5.352315674	-7.573438232	-8.612660645	-3.65533313	-3.829552612		-5.273224365	-9.860147949	6.525682373	4.029501465	-7.210402344
																			384	-4.774671509	-7.494327881	-8.065516602	-2.948019836	-3.200272461		-6.156677002	-9.019884277	6.124367432	5.01149707	-6.545413574
																			385	-4.145089844	-7.663217041	-6.991622559	-3.136706665	-2.38699231		-6.747129639	-8.536371094	5.51305249	5.961491943	-6.436425293
																			386	-3.330070923	-7.630106934	-6.354478271	-3.677393433	-2.293712219		-7.271332275	-8.370482666	4.689737305	6.527487305	-6.347436768
																			387	-2.794989197	-7.625996582	-6.681083984	-3.8660802	-2.456432007		-7.729659668	-8.764719238	4.230422729	7.669482422	-5.854448486
																			388	-2.578595276	-7.78488623	-7.327689453	-3.846766968	-2.667151978		-7.622112305	-8.595831055	4.751107422	9.179477539	-5.353459961
																			389	-1.75888855	-7.512776123	-7.471170166	-3.395453796	-3.269871887		-7.338564941	-8.466442871	5.495792725	10.00147314	-5.044471191
																			390	-0.408119507	-7.101665771	-7.217525879	-2.56014032	-4.024591797		-6.851392578	-8.651179443	6.010477783	10.87146826	-4.327482788
																			391	0.15539957	-6.316555664	-7.129756592	-2.220827209	-4.371311523		-6.851392578	-8.331666504	6.669162842	11.99746338	-3.406494385
																			392	0.75385614	-5.122445068	-7.118362549	-1.865514008	-3.638031494		-4.883422852	-7.739528076	6.797848145	12.5154585	-2.769505737
																			393	1.606937714	-4.113334717	-6.903593262	-1.27020079	-3.240751221		-4.449750488	-7.492639893	6.588532959	13.2254541	-2.296517273
																			394	1.420644348	-3.621224365	-5.523698975	-1.778887451	-3.579471313		-3.965453125	-7.444876465	6.553218262	14.31944873	-1.535528809
																			395	1.087475876	-3.457114014	-4.369054565	-1.647574234	-2.886190918		-3.927780762	-7.044613037	6.281903564	15.07744434	-0.794540161
																			396	0.991369926	-3.643003662	-4.3194104	-0.348261047	-2.440910889		-3.944483398	-7.308349854	6.124588257	16.01143945	-0.141551758
																			397	0.946451538	-3.658893311	-4.065641113	0.343052246	-2.795630798		-3.773811035	-8.353711426	5.99727356	16.68943457	0.191436646
																			398	1.020158157	-3.637782959	-4.483246948	0.794365356	-2.414350708		-4.111888672	-8.644323486	5.511958618	16.69543018	0.096425293
																			399	1.153177185	-4.133672607	-5.007477539	1.325678711	-1.897070496		-4.898716431	-8.579435059	4.970643555	17.06942578	0.333413696
																		Photopic 6 months a-wave
																				Dccfl/fl									Dkk3:Cre;DCCfl/fl
																			Time (ms)	1	2	3	4	5	6	7	8		1	2	3	4	5	6
																			-50	-1.952314331	-3.26527124	9.399714355	0.623769302	-1.304355469	3.807983154	-4.536413452	-43.73830762		7.057888672	-2.037452087	17.00246777	-4.314961548	-4.040026489	22.23339063
																			-49	-1.658991089	-3.656612427	9.796187012	0.621853333	-1.07484668	4.729655029	-4.470563721	-61.34775293		7.317442871	-2.181262329	17.03231934	-3.035878052	-3.954836548	22.78084277
																			-48	-1.621667786	-4.299953613	10.02465967	0.587937408	-0.290025391	3.741326904	-4.384964478	-74.32519849		7.488996582	-2.307072632	16.5041709	-1.780794922	-3.797646606	23.07229395
																			-47	-1.712344482	-4.491294922	9.293132324	0.178021515	0.628858398	4.010999023	-4.318739746	-80.31863989		7.46055127	-1.730132874	16.21602246	-1.509711548	-3.702456909	22.73974609
																			-46	-1.62702121	-4.478635986	8.87560498	0.080105541	1.245585938	4.692670654	-4.368015381	-81.98408142		6.88810498	-1.382693268	16.54787451	-2.104628296	-3.875267029	22.82319727
																			-45	-1.541697937	-3.989977295	8.790077881	-0.057810394	1.434719727	3.660342651	-4.275540894	-78.76153076		6.89165918	-1.515503601	17.04972559	-2.793545044	-4.276077332	22.65064941
																			-44	-1.536374695	-3.301318604	8.600550537	-0.075726318	1.009291016	3.392014771	-4.003691406	-72.57097241		6.831213135	-1.461563965	17.00357715	-3.93446167	-4.17888739	22.02210156
																			-43	-1.963051331	-3.004659668	8.575023438	-0.157642273	1.184112305	3.871686768	-4.093217041	-61.76441394		6.226767334	-1.189374146	17.27742871	-5.013378296	-3.713697449	21.20155371
																			-42	-2.517728149	-2.912000854	8.15949585	-0.351558197	1.970246094	3.983358643	-3.871992432	-42.41385547		6.238321289	-1.213184509	17.81528027	-5.062295166	-3.596507813	19.86900586
																			-41	-2.816404907	-2.811342102	7.47196875	-0.26547411	1.696817383	3.923030518	-3.240893066	-24.1193009		6.097875244	-1.363244843	17.88113086	-4.76721167	-3.535317871	18.76845703
																			-40	-3.035081543	-2.882683228	6.510441162	-0.011390045	1.446044922	2.618702515	-2.974543579	-13.02474634		5.705429199	-1.555305176	18.3809834	-4.134128418	-3.29612793	17.79590918
																			-39	-3.269758301	-2.994024414	5.518914063	-0.013306	2.022772461	2.534374512	-3.060944092	-2.402187866		5.512983643	-1.646115479	19.28283496	-3.669045044	-3.12693811	16.54336035
																			-38	-3.488434937	-2.769365601	5.205386963	-0.255221924	1.9163125	2.662046387	-3.685094604	11.94837061		5.288537598	-1.425925781	20.07668555	-3.66396167	-3.105748291	15.3868125
																			-37	-3.515111694	-2.876706909	5.403859375	-0.033137848	1.772665039	1.101718384	-4.405995117	26.80292126		4.920091553	-1.288986084	21.02253809	-4.05887854	-2.90255835	14.40626416
																			-36	-3.493788574	-2.940048096	6.104332275	-0.16305381	2.051892578	1.631390259	-4.194895752	39.67347974		4.371645752	-1.121296387	21.55638867	-4.721795166	-2.51336853	13.71371582
																			-35	-3.71246521	-2.275389282	6.880804932	-0.836969727	1.871213867	1.329062256	-4.121796265	42.23203821		4.143199829	-1.07985675	21.42424023	-5.088711792	-2.638178711	13.00516797
																			-34	-3.819141968	-1.898730469	6.701277588	-1.3668857	1.613566406	-0.157265747	-4.717071777	28.96658875		4.074753906	-1.459917053	21.2640918	-5.757628662	-2.858988892	12.20861963
																			-33	-3.781818604	-2.154071655	5.785750244	-1.832801559	2.002512695	0.006406128	-4.632722412	14.66914722		3.958307861	-2.099727325	21.07194336	-6.860545166	-2.28579895	11.71607129
																			-32	-3.920495361	-2.181412842	4.8582229	-2.090717529	2.715177734	0.332078247	-4.230872803	3.467705688		4.073862061	-2.468787598	20.96379492	-7.269461914	-1.858609131	11.13552393
																			-31	-3.883172119	-1.692754028	4.120695801	-2.300633484	3.203249023	0.533750122	-3.939273438	-10.62973975		4.10141626	-2.334097992	20.72364648	-7.064378906	-1.991419312	10.77897559
																			-30	-3.637848877	-1.880095215	3.055168457	-2.670549377	3.584351563	-0.358578003	-2.88392395	-29.47918323		4.008970215	-2.085908386	19.87749805	-7.481295654	-2.26822937	11.18242725
																			-29	-3.616525513	-2.439436401	2.085641113	-2.784465332	4.113485352	-0.336906006	-1.920449341	-50.90462671		3.98452417	-1.872468628	18.98534961	-7.280211914	-2.523039612	10.94587891
																			-28	-3.643202393	-1.442777649	1.98011377	-3.018381348	4.531212891	0.140765869	-1.941974915	-66.88206824		3.612078247	-1.571028931	17.91120117	-5.813128418	-2.37784967	9.549330566
																			-27	-2.949878906	0.089881104	2.280586426	-3.852297119	4.51134668	-0.051562012	-1.691500427	-75.77150977		3.219632324	-1.127589233	16.77705176	-4.546045288	-2.398659973	8.496782715
																			-26	-2.192555664	0.690539917	2.459059082	-4.334213135	4.320699219	1.750109863	-1.058526001	-78.03695923		2.983186401	-1.190399567	16.33290381	-3.640962158	-2.675470032	8.068234375
																			-25	-2.363232422	0.63919873	2.101531738	-4.53612915	3.859208008	3.181781738	-0.717551514	-71.59840063		2.582740601	-1.51095993	15.52075488	-3.505878784	-2.456280212	7.311686035
																			-24	-2.773909058	0.107857544	1.678004639	-4.762045044	3.469654175	3.307453857	-0.746577026	-59.33584619		2.538294678	-1.432020203	14.31060645	-4.70279541	-1.859090271	6.611138184
																			-23	-2.784585815	-1.039483643	1.048477051	-4.787960815	4.141756836	2.615125732	-0.627352539	-47.8092876		2.897848877	-1.448330475	13.47045801	-5.685712402	-1.401900513	6.590589844
																			-22	-2.891262451	-2.182824768	0.280949951	-4.573876831	5.276140625	0.790797607	-0.321753174	-33.3627312		2.901402832	-1.375390808	12.38830957	-5.870628662	-1.338710571	6.370041992
																			-21	-3.445939209	-2.542166016	-0.170577148	-4.167792725	5.94755542	0.204469604	-0.103653564	-16.30817468		2.644956543	-1.213201111	11.32616113	-5.35954541	-1.181520874	5.453493652
																			-20	-3.728616089	-2.365507324	-0.286104492	-4.24970874	6.440063965	0.360141602	0.318696045	-0.077620117		2.776510742	-1.056761475	10.6260127	-3.892462158	-0.524330933	4.640945313
																			-19	-3.595292847	-1.664848511	-0.275631836	-4.331624756	6.879447754	0.071813599	0.48942041	17.32893445		2.852064819	-1.108321777	9.989864258	-3.263378784	-0.133140991	4.052397461
																			-18	-2.885969482	-0.704189697	0.356840576	-3.765540649	6.999519043	0.133485474	0.581144775	26.06349292		2.859619019	-1.78138208	9.37171582	-3.106295654	-0.483951294	3.167848633
																			-17	-2.096646179	0.272468994	1.811313477	-3.343456421	7.033215332	0.147157471	0.447119385	26.73405127		2.955172974	-2.318192444	8.645567383	-2.30921228	-0.848761353	2.571300781
																			-16	-2.059322876	0.985128052	2.813786133	-2.921372437	7.099130371	-0.655170654	-0.18565625	26.70060205		2.690727173	-2.143002686	7.863418457	-1.646128906	-0.773571411	3.086751953
																			-15	-2.053999634	0.601786743	3.190258911	-2.515288391	6.78032666	-1.151498779	-0.442431641	25.70716052		2.558281128	-1.85281308	7.32327002	-1.683045654	-0.838381775	4.018205078
																			-14	-2.28867627	-0.245554565	2.770731445	-2.765204346	5.878366943	-1.05182666	-0.369332275	21.17771887		2.793835327	-1.875373352	6.493121582	-2.16196228	-0.987191772	5.421656738
																			-13	-2.507353027	-0.49289563	2.157204346	-2.991120361	4.247344604	-1.754154785	-0.56985791	13.88027734		2.92538916	-1.473683594	5.792972656	-2.072879028	-1.018002075	6.649108398
																			-12	-2.358029724	-0.112236938	2.547677246	-2.761036316	2.395447205	-1.634482666	-0.712133301	9.638828003		2.612943359	-1.000994019	5.878824219	-2.161795715	-1.008812195	7.164560059
																			-11	-2.048706482	0.524421875	3.376149902	-2.314952179	1.556299683	-0.454810913	-0.648408936	-1.610613525		1.968497314	-0.90080426	5.69267627	-2.184712402	-0.723622253	7.040011719
																			-10	-1.64338324	0.757080811	3.686622437	-2.044868164	1.557370972	0.640861084	-0.766809326	-16.70805493		1.244051514	-0.726364594	5.476527832	-1.075629028	-0.476432556	5.955463379
																			-9	-1.382059937	0.113739502	3.463095215	-1.886784058	1.165192261	0.946532959	-0.734334839	-26.59750049		0.691605469	-0.637924927	5.716378906	-0.238545776	-0.573242676	4.742915039
																			-8	-1.040736694	-0.401601685	2.765567871	-1.688699951	0.591950928	0.274204956	-0.891985352	-36.73494592		0.743159668	-0.431985199	5.080230469	-0.077462402	-1.006052673	3.786367188
																			-7	-0.363413391	-0.500942871	2.224040527	-1.250615906	0.875490967	0.495876831	-0.481385986	-42.62438745		0.746713623	-0.085295593	4.096082031	0.123620728	-1.386863037	2.709818848
																			-6	0.361909912	-1.116284058	2.658513428	-0.53253183	1.289312378	0.555548828	0.288213379	-49.91383289		0.214267822	0.080144165	3.549933105	0.274704102	-1.057673096	1.937271484
																			-5	0.543233154	-1.611625244	3.446986084	0.041552246	1.182664795	-0.988779297	-0.32693689	-57.38727441		0.377821777	0.075583801	2.445784668	0.219787354	-0.246483154	2.164723633
																			-4	0.468556519	-1.222966492	3.20545874	0.231636292	0.964736084	-1.209107178	-0.865087402	-53.19671985		0.713375977	0.379773438	1.305636719	-0.063129272	0.402706543	2.064174805
																			-3	0.521879761	-0.462307739	1.299931396	-0.114279602	0.651401184	-0.851435303	-0.846737976	-39.57416138		0.120929932	0.673463257	1.059487793	-0.550045898	0.709896484	1.491626953
																			-2	0.319203064	0.054351196	-0.149595703	0.035804443	0.416378662	-1.809763428	-0.782138428	-17.13560693		0.176484131	0.576902893	0.559338867	-0.876962646	0.707086426	0.671078125
																			-1	0.276526306	0.35101001	0.134876709	0.521888489	-0.235675049	-0.588091309	-0.180414063	2.85495166		0.360038086	0.612842529	-0.526809082	-1.117879272	0.258276123	-0.517469727
																			0	0.297849548	0.123668701	1.083349609	0.527972595	-1.032884888	0.685580566	-0.026814575	3.085506104		-0.108407959	0.554282288	-1.160957031	-1.430796021	-0.290533936	-1.194018555
																			1	0.319172791	-0.203672485	1.585822021	0.96605661	-0.952813599	-0.000747437	-0.178090088	10.98006458		-0.176853516	0.151971924	-1.595106445	-0.771712646	-0.215344116	-1.430566406
																			2	0.500496155	-0.267013672	0.776294922	1.788140686	-0.628836182	-0.093075562	0.241884277	39.35461523		-0.365299561	-0.350088318	-2.027254883	0.721370605	-0.072154297	-1.779115234
																			3	0.041819397	0.00964502	-0.689231934	1.890224792	-0.647358643	1.024596313	0.611108887	52.15317358		-0.253745605	-0.471398743	-2.63940332	1.706453857	0.037035645	-2.423662109
																			4	-0.320857361	1.150303833	-1.840759766	1.560308807	-0.854474823	0.568268433	1.165083252	53.73573218		-0.094191406	-0.146458984	-2.839551758	1.889537354	0.740225586	-2.980209961
																			5	-0.139534058	2.162962891	-2.966286621	1.598392944	-0.748059692	-1.282059692	1.474682739	53.11029065		-0.546637207	0.094480743	-2.833700195	1.556620483	1.103415283	-3.448758789
																			6	0.057789246	2.327621582	-3.987814453	1.244476967	-0.391050903	-0.554387573	0.932782227	45.66084131		-0.735083252	-0.160329651	-3.341848633	0.699703857	0.982605225	-3.317306641
																			7	0.191112549	1.344280396	-4.441341309	0.250561005	-0.566198364	0.81328418	0.711131592	39.70739966		-0.975529297	-0.281389893	-3.701998047	0.176787231	0.655795105	-2.697855469
																			8	0.452435791	-0.511060791	-5.510869141	-0.855354889	-0.920252075	0.908956177	0.605356201	28.84195813		-1.115975586	0.126049683	-4.020145508	-0.062129395	0.022984802	-2.73440332
																			9	0.537759094	-2.098402039	-6.748395508	-2.281270874	-1.710993286	0.466628174	0.045330566	10.3845166		-1.020421143	-0.039510559	-4.604293945	-1.107046204	-0.299825317	-2.994952148
																			10	0.223082336	-3.201743286	-6.205923828	-4.067186768	-3.397547119	-0.137699951	-0.739069946	-10.04093274		-0.908867188	-0.093570923	-4.932443359	-2.483962891	-0.868635376	-3.2715
																			11	-0.027594421	-4.297084473	-5.073450684	-5.725102783	-4.986569336	-0.688027832	-2.125720459	-24.44237427		-1.185313232	0.372868774	-4.84259082	-4.044879639	-2.081445679	-4.148047852
																			12	-0.470271118	-4.764425781	-5.338978027	-7.215018555	-6.053654541	-2.164355957	-3.708121033	-28.57181982		-1.781759277	-0.170441528	-5.472740234	-5.271796265	-3.002255737	-5.112595703
																			13	-1.360947876	-4.307766968	-7.244504883	-8.192934326	-6.864645264	-3.964684082	-5.083271606	-31.65326123		-1.730204834	-0.954501892	-6.274888672	-5.742713013	-3.835065796	-5.397143555
																			14	-2.139624512	-4.207108398	-9.228033203	-8.970850586	-7.899012207	-4.095012207	-6.822296875	-38.59070654		-1.806650879	-1.051062134	-6.625037109	-6.003629395	-5.199875977	-5.473692383
																			15	-2.83830127	-4.990448853	-9.809560059	-9.324766113	-9.456222168	-4.349339844	-8.580822754	-41.12814844		-1.94309668	-1.190622559	-7.001185547	-5.488546143	-6.178686035	-5.814240234
																			16	-3.920978027	-5.657790405	-9.761087402	-8.222682617	-10.60518213	-5.155668213	-9.523222656	-33.08959375		-1.827542969	-1.3921828	-7.433333984	-4.677463013	-6.679496094	-5.986789063
																			17	-5.035654785	-5.945131836	-9.562614258	-6.872598389	-10.65773584	-5.441996338	-9.651874023	-19.67503516		-1.827988281	-1.149743042	-7.963482422	-3.962379883	-7.468306641	-6.223336914
																			18	-5.318331421	-6.368472839	-9.084141602	-5.450514282	-9.405602051	-5.776324463	-9.120398926	-8.348480469		-1.81243457	-0.728803406	-8.397630859	-2.223296387	-8.091116699	-6.499885742
																			19	-5.441008057	-6.123813843	-9.097669434	-3.116430237	-6.548062012	-5.638652588	-8.084299805	4.546078125		-2.040880371	-1.028863708	-9.003780273	0.411786987	-8.373926758	-6.520433594
																			20	-5.851684814	-4.887155273	-9.185196777	-0.8463461	-3.512459473	-6.054980225	-6.691950195	21.88862842		-1.74132666	-1.833174103	-9.349927734	2.654870117	-8.532736816	-6.836981445
																			21	-5.878361572	-3.54249646	-8.134723633	1.215737946	-1.005544189	-5.91530835	-5.019600586	37.39918701		-1.337772217	-2.291234375	-9.320077148	4.625953613	-8.061546875	-7.241530273
																			22	-5.233038208	-2.393837769	-5.924250977	4.005822021	2.03512085	-4.837636475	-3.035501221	49.23774536		-1.494218262	-2.653044617	-9.500224609	7.463036621	-6.588356934	-7.534077148
																			23	-4.21971521	-0.757178833	-2.87977832	7.315906006	6.664629395	-3.8619646	-0.789901733	57.64430383		-0.982664307	-3.566355164	-9.970374023	11.55612012	-5.345167236	-7.826625977
																			24	-3.446391602	2.491479858	0.770694336	11.91399023	13.53113818	-0.654292725	1.998322754	62.60285449		-0.043110107	-3.984415405	-10.39052246	17.45920313	-4.527977539	-7.727173828
																			25	-2.225068481	7.432138306	4.701166992	18.39207422	22.39186621	3.43337915	5.805797119	64.63341284		0.664443848	-3.987975708	-10.32066992	24.75828711	-3.33478772	-7.451722656
																			26	0.084254883	12.93279785	8.479639648	24.5501582	32.70628223	6.005051025	11.05052197	62.03197144		1.887998047	-4.12803595	-10.39281934	32.30737109	-2.5815979	-7.200270508
																			27	3.289577942	17.82545544	12.27011279	28.99624316	43.03232031	9.616723145	18.40562109	50.31852197		4.195552002	-3.457846191	-10.85296777	38.67045313	-1.286408081	-6.876818359
																			28	6.526901245	21.67411597	16.85458643	30.97832617	51.7437207	14.36239551	27.35759473	33.69308008		7.367106201	-2.407406494	-11.04911621	42.39753711	0.89678186	-5.889367188
																			29	9.556224487	25.26677441	21.22105762	30.06441016	57.61182422	18.19206641	37.20394531	21.81163867		10.66665991	-1.270466797	-11.14126465	43.39662109	3.349971924	-4.597915039
																			30	12.40954834	28.00343298	23.71353052	29.12649512	60.97918945	22.06973828	46.67004492	11.29019336		13.45821387	0.0824729	-11.12141406	42.42570313	7.219161377	-4.338463867
																			31	14.68687109	29.01209149	25.33400342	29.0205791	63.13587305	26.62541113	53.48764258	1.920751953		16.03376855	1.517162598	-10.92756152	40.77878711	11.84835156	-4.487010742
																			32	16.35619482	28.94075	27.03847632	27.84266211	63.40059961	30.10908398	57.15111719	-4.960693359		18.09332251	2.617852295	-10.65370996	39.15386914	16.37354102	-4.74755957
																			33	17.08151855	26.97740857	27.87094922	26.01674707	61.53743555	30.01675586	58.4880918	-14.69013477		18.82087622	2.940791748	-9.567859375	37.30295313	20.48273145	-5.408107422
																			34	16.91084155	23.48206714	28.01342212	23.69483105	59.31433594	29.13842578	58.03381836	-17.37158008		19.35643018	2.642981445	-8.402006836	35.29603711	23.1559209	-5.98865625
																			35	16.00416431	19.98272754	27.48989502	20.82091504	58.21846875	30.46209863	56.65454297	-7.853023438		19.93198486	2.081671387	-7.54415625	34.02711914	23.56311133	-6.577204102
																			36	14.76148804	16.41538611	25.81836597	19.05099902	59.36513672	30.83177051	54.65789258	0.337533203		19.49553906	1.27986084	-7.014304688	34.42020313	22.15430078	-7.069751953
																			37	13.74281079	13.41604468	24.18083887	19.63308301	63.52401953	30.61144336	51.65999023	11.94408789		18.61909277	0.710300537	-7.214453125	37.58528516	20.70749121	-7.114300781
																			38	13.60413452	14.40070313	23.42331177	22.42316699	70.48785352	33.04511426	48.41671484	26.55864258		17.61864648	0.321490479	-7.314601563	43.79236914	19.20067969	-7.262848633
																			39	14.87345752	21.53736157	23.95778467	27.25325098	79.56831836	36.26478711	45.44268945	33.91719922		16.6502002	-0.009569946	-7.01075	51.18745313	17.05387012	-7.491397461
																			40	17.56678027	32.04602026	25.84825757	33.07533594	88.62251172	40.29245898	42.86303906	49.76375781		15.70975488	0.029619629	-6.092898438	58.28053516	14.60306006	-7.399944336
																			41	21.42810303	41.99068066	29.15473047	38.51341797	95.35503516	45.44613086	42.35626367	68.98631641		15.10130859	-0.311440674	-5.245046875	64.25562109	11.83025	-7.468493164
																			42	25.11342773	48.69133716	33.52520337	42.67150391	99.20896875	51.61180273	45.39911328	71.46486719		15.61686377	-0.367250977	-4.737195313	67.56870313	9.257439453	-6.993041016
																			43	27.56675049	51.7439978	37.22767822	45.14158789	100.3534141	57.87547266	51.65658789	73.18342578		17.27241748	0.208188721	-4.38334375	68.20578711	7.506629395	-5.701588867
																			44	28.85207349	51.7966543	40.25014917	46.42766992	99.21872266	60.20314844	60.3653125	84.39798438		20.39597168	0.92037854	-4.939493164	66.51886914	5.955819336	-4.762137695
																			45	29.16139624	49.58931494	42.89262012	47.54575586	95.62049609	62.40481836	70.40166016	90.80453516		24.67552539	1.666067871	-5.911640625	63.11595313	5.023009277	-3.974685547
																			46	29.21472095	46.18597534	44.72309497	47.83183984	90.76548633	63.53448828	79.80725977	85.66709375		28.8390791	2.097757813	-6.213790039	60.18103516	5.018198975	-2.763234375
																			47	29.1240437	42.40663184	45.05156592	47.03792383	86.10091992	60.93816309	87.32648828	71.32965234		32.13063281	2.765197266	-5.767938477	57.47811914	5.943388916	-2.295782227
																			48	28.18536646	38.87129236	43.65404102	46.43600781	81.27402148	59.33383301	92.38283594	62.45621094		34.07018652	2.918387207	-5.368085938	54.36920117	8.514578857	-2.652330566
																			49	26.79868945	34.89594897	42.27051196	44.7380918	77.5570918	57.33750781	94.68893359	59.13476172		34.42574219	2.057327148	-5.088235352	51.01628711	12.29376904	-3.000878906
																			50	24.56401416	31.36460938	40.91298279	41.65617578	74.58614844	53.57917773	94.90278516	41.43732031		33.74929639	1.285766602	-4.318383789	47.29136914	16.8729585	-3.557426758
																			51	22.13733691	29.37726807	39.13145752	39.31825977	71.38026563	50.52284863	93.46138281	19.33187891		32.39684961	0.512456543	-3.424531738	43.97845313	21.27014893	-4.441975586
																			52	21.10265967	27.55792627	37.25393262	37.2523457	69.74760547	48.81652246	90.96673047	12.93843359		31.2204043	-0.039604004	-2.956680664	42.11753516	25.19133936	-5.286523438
																			53	20.45198242	25.70258496	35.58040332	34.73042773	69.62419141	47.85219336	87.43633203	11.84899219		30.51995801	-0.407414063	-2.64882959	41.47461914	28.53052734	-5.635071289
																			54	19.33730713	24.46324365	34.58687646	33.04851172	69.57896289	47.70186523	83.04693359	5.327546875		29.59151172	-1.000974854	-2.212977539	41.91170117	30.28771777	-6.143619141
																			55	18.36663013	23.73990186	33.25134741	32.71059668	68.68688086	49.54753906	78.53678125	-0.129894531		28.61906543	-1.373285156	-1.523126465	43.59078516	30.8389082	-7.236167969
																			56	17.36395288	22.88856055	31.10182031	33.06867969	67.06348242	50.32721094	74.04838281	3.004660156		27.58662012	-1.288345459	-0.621274414	45.42586914	30.37209766	-8.360714844
																			57	15.67327661	21.92122119	29.04629321	34.28276563	65.50483398	48.09288281	69.73735547	15.59521289		26.40217383	-1.580655762	0.12257666	47.80295313	28.57528809	-9.965263672
																			58	13.63059937	22.49787964	27.55276611	36.61684766	63.94810938	46.79255469	65.23482813	31.17777148		25.55772754	-2.74396582	0.276427734	50.77003711	25.97047754	-11.90581152
																			59	11.81192322	23.98653809	25.75723877	39.07093164	61.76538281	45.64422461	61.00843164	44.44833008		25.18128223	-3.530026123	-0.189719727	53.49711914	23.27566797	-12.83035938
																			60	10.15324597	24.53119678	23.82971191	40.86101758	59.60472266	43.39989746	57.3771543	57.83888086		24.58883594	-4.069586426	-0.933868652	55.91820313	20.59485742	-13.2349082
																			61	8.542569824	24.67185498	22.72618457	41.70709961	57.67323047	41.54356934	54.49125195	68.50143945		23.74439063	-4.983646729	-1.126017578	57.37328516	17.81004785	-13.37545703
																			62	6.771892578	24.58451367	22.50065771	41.99318555	54.34948633	38.77724219	53.22572852	73.10799805		23.32794434	-5.35520752	-0.938165527	57.32636914	15.32923633	-12.94800488
																			63	5.28921582	24.20117236	22.80713037	41.94326953	50.6337793	35.54091211	52.64782813	77.58654883		23.55549805	-6.016767822	-0.962314453	56.29945117	13.12242627	-12.53655273
																			64	4.382539185	23.11383252	22.98960352	41.03735156	48.04175586	33.09058496	53.40517578	77.82510742		23.51505273	-7.300828003	-0.596462891	55.02653516	10.9916167	-12.05310156
																			65	3.603862427	21.29449121	23.09807422	39.9874375	46.24251367	29.73025732	56.12602734	76.92766602		22.81460645	-7.495638245	-0.348611328	53.11762109	9.614806152	-11.76164941
																			66	2.553186035	19.6951499	22.48254785	38.78552148	44.78871094	26.27792969	58.277625	73.43822461		22.13016113	-7.526698547	-0.376760254	50.37870313	8.619996094	-12.17419727
																			67	1.646509277	17.90780811	20.59102051	37.11960547	43.2295625	23.38760205	60.07134961	63.66077539		21.90971484	-7.937758789	-0.036908691	47.38578516	7.527186035	-12.32274609
																			68	1.443832581	16.0484668	18.33349316	35.34968945	41.06796289	19.91527344	62.20482227	58.21133203		21.58926953	-8.156069092	0.052943359	44.94486914	7.222375977	-12.38329395
																			69	1.321155823	14.34112646	15.90396582	33.19577246	38.50437793	16.90894531	63.80567578	46.24989063		20.93282324	-8.787379272	-0.613205566	42.82995215	8.179565918	-12.71584277
																			70	1.166479004	12.97778516	13.40243945	30.53785742	36.2305752	14.52861694	65.02627344	23.16844531		20.95637695	-9.693189453	-1.809354492	40.38903516	9.810755371	-13.08839063
																			71	1.539802246	12.17844336	11.32291211	28.56794141	34.85784766	12.63228931	65.96399609	6.399003906		20.57593066	-10.82199976	-2.709501953	38.06411816	11.63794482	-13.34893945
																			72	2.13712561	11.65910205	8.993383789	27.30202539	34.37679492	11.80596167	66.20059961	-0.490441406		19.17148438	-11.75756104	-2.679651367	35.92520117	13.14513525	-13.3774873
																			73	2.270448975	11.75976172	6.725856445	25.61210938	33.69388184	11.71163306	65.69507227	-4.275882813		18.23504004	-12.20612036	-2.693798828	33.83628613	13.93232471	-13.59803418
																			74	2.035772095	11.06041992	4.736330078	24.53019434	33.0784541	10.48130444	64.70166992	-3.909328125		17.67459277	-12.46168164	-3.141948242	31.55337012	14.57951514	-14.52258203
																			75	2.249095337	9.593078613	2.282801758	23.44827734	33.04028906	9.524976685	63.59952344	-1.982771484		17.21414795	-12.82649121	-3.05009668	29.39245313	16.00670459	-15.61512988
																			76	2.702418701	8.777737793	0.225274414	21.23836133	32.45189258	9.350649048	62.60562109	-0.920216797		17.09770068	-13.31730225	-3.100245117	27.34953613	17.63389453	-16.20367773
																			77	2.819741943	7.794396484	-1.16025293	19.92444531	31.30454199	7.364320435	60.84834375	10.03033984		16.87325586	-13.61186133	-3.624393555	25.26661914	18.51508398	-16.64822656
																			78	2.921065186	6.939055176	-1.975779297	19.05053027	30.71372168	6.467992676	58.20369531	25.38889844		16.44480957	-13.93717285	-3.976542969	24.04370215	19.12627441	-17.23677539
																			79	2.782388428	5.963714355	-2.259306641	17.49661328	30.30558984	7.563664551	55.64079492	37.09945313		16.35636328	-14.28798291	-4.17069043	22.39278613	18.86746387	-17.69732422
																			80	2.25971167	4.332372559	-2.302834473	16.07069775	29.32281836	6.067336487	52.94426758	53.49801172		16.45191748	-14.56854346	-4.026838867	19.98386914	18.0626543	-18.06187109
																			81	2.009035156	3.197031738	-2.416361816	15.03678174	27.49251465	3.647008545	49.74561719	70.3285625		16.49147168	-14.81835352	-3.518988281	18.31895215	17.47584375	-18.41041992
																			82	2.030358398	2.49769043	-2.845888672	14.53086621	25.21827344	3.874680176	46.89896875	76.43112109		16.74302637	-15.40516357	-2.583135742	17.58803516	16.45503418	-18.85496875
																			83	1.955681641	1.722349121	-3.245416016	13.76094971	23.456875	3.276352539	44.78856641	74.86167773		16.5825791	-15.78447412	-1.405285156	17.77111816	15.33222363	-19.66751563
																			84	1.977004883	1.263008057	-3.364943359	12.22303418	21.96244727	1.508024414	42.79166602	75.57223633		16.26613428	-15.92328418	-0.209433594	17.36820215	14.55741406	-20.56806445
																			85	2.142328125	0.963666992	-3.410471191	10.69311768	20.44273633	1.533696289	40.59714063	75.62678711		16.38968848	-16.86734473	0.590417969	16.00928613	13.70060303	-20.62861328
																			86	2.019651611	0.056325439	-3.685997559	9.451202148	19.39018311	1.491368408	38.31349023	74.0733457		16.20924219	-17.98715479	0.890269531	14.64836914	11.88779297	-21.05716211
																			87	2.264974854	-1.503015625	-3.521525146	8.521286377	18.24175391	1.075040283	36.14108984	68.5919043		16.1807959	-18.47696484	0.858121582	13.16345215	9.970983398	-21.92570898
																			88	2.238298035	-2.734356445	-3.173052734	7.871370117	16.62304443	1.010712402	34.4506875	53.19846289		16.4203501	-18.47027539	0.303972656	11.37253516	8.646172852	-21.81025781
																			89	1.315621277	-3.685698242	-3.502580322	7.43745459	15.37030273	1.522384033	31.98766309	36.51701367		16.00790527	-18.39433545	0.849824219	9.047618652	7.371362793	-22.09480664
																			90	1.032944519	-5.257039063	-4.226106934	7.14753833	14.37637451	2.198056152	28.93501367	20.51557227		15.90745801	-18.461896	2.091675293	7.38270166	6.304552734	-22.95535352
																			91	1.118268005	-6.516380615	-5.063634521	6.809622559	13.09778906	0.201728027	27.3291123	5.306126953		16.3070127	-18.42120605	2.415527344	6.843785645	5.537742676	-23.67190039
																			92	0.611591187	-7.31172168	-5.957161865	5.943706787	10.93086084	-2.606599731	26.18058691	-9.103314453		15.64656592	-18.2072666	2.921378906	6.576868652	4.806932373	-24.56444922
																			93	0.328914429	-7.991062988	-6.574689453	4.789790588	9.303775879	-3.852927734	24.3100625	-23.23275977		14.65412061	-18.14482666	3.37322998	6.22195166	4.290122314	-24.81699805
																			94	0.270237671	-7.958403564	-6.444216064	4.051874878	8.700940918	-5.433255859	22.63541016	-30.40220215		14.2896748	-17.72288672	3.165081543	5.353035156	4.041312256	-24.34954492
																			95	-0.204438965	-7.877745117	-5.881743652	3.441958862	7.656324707	-7.135584473	20.98163574	-30.37964746		14.13722852	-17.15719727	2.682933105	4.562118408	3.562501709	-24.28209375
																			96	-0.423115479	-8.969086426	-5.31127124	3.224042908	7.102614746	-8.433912598	18.91085986	-18.84509082		14.01678271	-17.46225732	2.44478418	4.669201904	3.16769165	-24.67064258
																			97	-0.401792236	-10.54042798	-5.092797852	2.974126938	6.462592285	-10.96824023	16.92383447	-1.43853418		13.83633643	-17.97106885	3.322635742	4.774285156	3.362881592	-25.22719141
																			98	-0.988468994	-11.58776831	-5.110325195	2.852210968	5.661444824	-12.90456836	14.92230859	8.912020508		13.24789136	-18.15287891	4.468487793	4.015368164	3.418071533	-25.79973828
																			99	-0.919145752	-12.49110986	-4.675852783	3.114294983	5.516047363	-12.120896	13.34715869	19.6785752		12.75544434	-18.01018945	4.774338867	2.82445166	2.74126123	-26.01228711
																			100	-0.43382251	-13.15045142	-4.293380371	2.896379242	5.348493652	-12.24722461	11.69563281	38.57313379		12.71899927	-17.54324951	5.08619043	2.199535156	2.300451172	-26.47283594
																			101	-0.652499023	-13.90579285	-4.596906982	2.470463287	5.528283691	-14.23155225	9.943482178	54.73169141		12.05855237	-17.61805957	5.578041992	2.140618408	2.101640869	-27.09338281
																			102	-0.903176025	-13.8571333	-5.36043457	2.164547295	6.20182373	-12.60788086	9.147456299	59.93825		11.3101073	-18.26362012	6.135893555	1.59570166	1.414830811	-27.47393164
																			103	-1.585852783	-12.79247485	-6.507962158	1.818631317	7.04417627	-9.952208496	8.614181396	61.69680078		11.42166113	-19.09718018	6.379744629	1.410784912	0.482020752	-27.84648047
																			104	-2.508529541	-12.61181616	-8.141489746	1.288715332	8.075372559	-11.19253613	7.952530762	61.91935938		11.40921509	-19.67474072	5.993596191	2.051868408	0.097210449	-28.2750293
																			105	-2.823206177	-13.16315674	-9.543016113	0.9827995	8.729787598	-11.69486475	7.316004883	56.27791797		10.82876904	-19.67030078	5.741447754	2.490951538	0.260400391	-28.57557617
																			106	-3.217882935	-13.61449829	-10.01654395	0.932883545	8.597358887	-10.76319238	6.832229126	44.58047656		10.196323	-19.92911133	5.441299316	2.32603479	0.127590332	-28.492125
																			107	-3.548559692	-14.1218396	-9.812071289	0.810967529	8.544086426	-11.207521	6.374829346	35.71502734		9.89587793	-20.19442139	5.171150879	1.819118164	-0.397219971	-28.25667383
																			108	-3.431236328	-14.68918115	-9.597598633	0.665051636	9.149907715	-11.76984863	5.581553589	29.45758545		10.0154314	-20.07198145	5.497002441	1.49420166	-0.950030151	-28.0852207
																			109	-3.18591333	-14.57652173	-9.357125488	0.423135742	9.674510254	-11.47217627	4.987902771	12.45614404		10.10698584	-19.99579199	6.592854004	1.18928479	-1.608840271	-27.34576953
																			110	-2.9405896	-14.54786304	-9.688652832	0.197219849	9.586425293	-11.17650488	4.793251953	-9.841301758		9.990539795	-19.72985254	7.822705078	0.654368286	-1.967650452	-25.84631641
																			111	-2.599266846	-15.05920459	-10.66818066	-0.268696167	9.617559082	-10.67283252	4.785727173	-29.97074707		9.45809375	-19.34641211	8.430556641	-0.582548584	-2.114460571	-24.93886523
																			112	-2.225942871	-14.94654614	-11.39770801	-0.742612061	10.29306787	-12.22116113	4.486451416	-46.50018848		8.989647705	-18.99722266	9.314407715	-2.51946521	-2.579270874	-25.07141211
																			113	-2.364620117	-14.56588647	-12.40723438	-0.984528015	10.93979541	-14.16148877	3.662300659	-54.40563379		8.86120166	-18.5612832	10.47425977	-3.576381836	-2.916080933	-25.33196094
																			114	-2.759296387	-14.33722803	-13.30276221	-1.08244397	11.49027295	-12.82581641	2.937775391	-55.57507568		8.472755615	-18.20934375	10.91011133	-3.521298706	-3.168890991	-25.10450977
																			115	-3.233973633	-14.25256958	-13.25828955	-0.596359863	12.16665674	-12.84814502	2.224625	-50.368521		8.320310059	-17.56540332	10.95196289	-3.588215332	-3.38770105	-24.98105664
																			116	-4.02864978	-13.86790991	-12.84381738	-0.390275757	13.01404053	-13.22047266	1.795224243	-41.3539624		8.487864014	-17.04146484	10.39781445	-3.749131958	-3.724511353	-25.57760547
																			117	-4.423327026	-13.04725146	-12.77734375	-0.528191772	13.55073682	-12.28480151	1.497198975	-31.3634082		8.411418457	-17.3097749	9.541665527	-4.108048828	-4.197321411	-26.1661543
																			118	-4.482003662	-12.56259302	-13.48887109	-0.546107666	12.67558936	-12.22112915	0.854423096	-17.21285352		7.95097229	-17.68908545	9.15951709	-4.872965454	-4.554131714	-26.39470313
																			119	-4.49268042	-12.71793433	-15.04439844	-0.79602356	11.85297314	-12.29545776	0.628272949	-2.934294922		7.746526245	-17.75564551	8.661368652	-5.08588208	-4.732941772	-26.47125
																			120	-4.679357178	-13.2892749	-16.99792676	-1.173939453	11.54148193	-13.1157854	0.68074707	14.17626343		7.8180802	-17.74745557	8.303219727	-4.77679895	-5.021751831	-26.01179883
																			121	-4.978033813	-13.98461646	-18.5054541	-1.943855408	11.00802197	-14.27611304	0.381221802	31.75081421		7.785634155	-18.04576611	9.113071289	-5.463715332	-5.53856189	-25.74434766
																			122	-4.844710571	-14.93995789	-18.53898145	-2.865771408	11.91068701	-14.54844165	-0.224428955	44.22137256		7.44518811	-18.17957617	10.39492334	-6.818632324	-6.167372437	-26.12489453
																			123	-4.647387268	-15.27529834	-18.01850781	-3.611687378	13.95228955	-14.01476953	-0.479454346	58.25193115		7.028742676	-18.07513672	11.22077441	-7.245548828	-6.186182495	-26.28944336
																			124	-5.058063965	-14.70263977	-17.28803613	-4.325603333	15.22923633	-13.0850979	-0.74172998	67.3784895		7.204296509	-18.56444678	11.72862598	-7.376465332	-5.836992554	-25.85399219
																			125	-5.308740723	-14.5139812	-15.6515625	-4.343519348	15.50593213	-13.09542578	-1.992380371	66.43304004		7.531850952	-19.17175684	12.08847754	-7.795382324	-6.815802734	-25.90654102
																			126	-5.079417389	-14.64932275	-14.55308984	-4.249435059	15.09840918	-12.76575342	-3.327281006	49.19959863		7.415404907	-18.92481738	12.81832861	-8.226298584	-7.392612793	-26.37508789
																			127	-5.330094116	-14.30466333	-14.72461719	-4.691351013	14.79041846	-10.77808203	-3.939806396	23.55815698		6.76295874	-18.10687793	13.82218066	-9.039215332	-7.481422852	-25.66763672
																			128	-5.964770813	-13.92000464	-16.20614355	-4.925267273	15.24024023	-10.27040967	-4.192832031	9.284707764		6.238512695	-17.52268799	14.34003223	-9.758131836	-8.31023291	-24.76018359
																			129	-6.13544751	-13.47134619	-18.74967188	-4.911182983	15.85462354	-11.25073828	-4.534232422	-5.284733887		6.15406665	-17.46824805	14.69788281	-10.08704883	-8.493043457	-24.60473047
																			130	-6.290124268	-13.34268774	-19.96519922	-4.569098999	16.58144434	-11.64906592	-4.787383057	-22.08617529		5.893620605	-17.88755859	15.35173535	-10.24396582	-8.721853516	-24.5452793
																			131	-6.588801025	-13.89802808	-18.65672656	-3.931014954	17.57764063	-10.73339355	-4.971533203	-34.78362085		5.537175049	-17.96861865	15.71158594	-10.57488281	-8.714663574	-24.67782813
																			132	-6.775477661	-14.84136963	-17.03425293	-3.340930664	18.06683691	-10.49972217	-5.328559326	-48.40106628		5.368729004	-17.3511792	15.8174375	-11.23779883	-8.373473633	-25.13837695
																			133	-7.042154297	-15.93271106	-16.66178027	-3.214846619	17.74693945	-11.4140498	-5.477459473	-58.41850781		5.680283447	-17.23398926	16.01928955	-11.37871582	-8.858283691	-25.73492383
																			134	-7.308831055	-16.24805151	-17.10730859	-3.656762604	16.99444824	-10.79237842	-5.406985107	-59.55595325		6.003837402	-17.23079932	15.97314063	-10.98963184	-9.339094238	-26.34747266
																			135	-7.175507813	-16.18739301	-18.09483594	-3.770678589	17.01948877	-10.83270605	-5.572010742	-52.33339478		5.723391357	-16.65736084	16.1289917	-10.30054883	-10.0359043	-26.48802148
																			136	-7.15418457	-16.0107345	-18.32236328	-4.140594559	18.19487207	-11.05503369	-5.933160889	-45.84684021		5.190945313	-16.51216992	16.73284375	-10.78146582	-10.60471436	-25.98057031
																			137	-7.836861206	-16.04607599	-17.49989063	-5.198510315	19.15375586	-10.38936255	-6.166937012	-34.40828174		4.822499268	-16.49173145	17.23869531	-11.40638281	-10.23752441	-25.26511719
																			138	-8.055538086	-16.6254165	-17.75741602	-5.904426514	19.9232959	-10.74769019	-6.195587158	-15.09772717		4.638053711	-16.43854053	17.50254639	-10.87729932	-10.27033447	-24.26166602
																			139	-7.5382146	-16.44075793	-19.14294434	-5.722342285	21.05110156	-10.7340188	-6.203612793	-0.107168701		4.205607666	-16.39610205	17.82239844	-11.81421533	-10.59514453	-23.55421484
																			140	-7.628891357	-15.94009937	-20.74647168	-5.676258423	21.58562598	-10.65834644	-6.625513428	12.96338574		3.973161621	-16.05066113	18.66424902	-12.94313232	-10.59995459	-23.99876172
																			141	-8.247568115	-16.53544092	-22.43399902	-6.518174194	21.91497852	-11.49467407	-7.225539063	27.57794434		4.144715576	-15.85797217	19.78810059	-13.14404932	-11.22876514	-24.86731055
																			142	-7.922244629	-17.30678137	-23.38752637	-6.776089905	22.6719248	-11.76100244	-7.515189697	37.92850269		4.25627002	-15.81178271	20.47195313	-12.71696631	-12.0935752	-25.76785938
																			143	-7.292921509	-17.9581228	-23.68305469	-6.482006126	22.08469922	-10.97533032	-7.709840088	43.35905334		4.595823975	-15.68784277	21.03380371	-11.94388281	-12.37238525	-27.0284082
																			144	-7.431598145	-18.66946436	-23.86058203	-7.107921844	20.53262988	-11.48565894	-8.120490234	48.51761182		4.77537793	-15.22915332	21.88165527	-12.18479932	-12.66319531	-27.81695508
																			145	-7.346274902	-19.24880469	-24.05610938	-7.861838074	19.85807617	-12.73198682	-8.678641113	44.94017041		5.086932129	-14.86246338	22.49550684	-12.63371582	-13.39600586	-27.85350391
																			146	-7.26095166	-19.96414624	-24.73163477	-7.847753784	20.05925684	-11.53231445	-9.365666504	33.11472095		5.710486328	-14.67327393	23.23335938	-12.53263281	-13.82281592	-28.00205273
																			147	-7.719628296	-20.37148779	-25.19916211	-8.017669556	20.59932813	-9.980643066	-9.827067383	21.5292793		5.454040283	-14.14283398	24.42920898	-12.6675498	-13.75962598	-27.86259766
																			148	-7.394305054	-20.8188291	-25.29869043	-8.347585693	20.63400879	-9.870970703	-9.749467285	7.655837891		4.597594238	-13.82289404	25.23106152	-13.08046582	-13.92043604	-27.36314648
																			149	-7.180981689	-20.62617065	-25.36021777	-8.309501465	20.16395508	-9.683299316	-9.624242676	-4.313607422		3.849148438	-13.79345459	25.70291406	-13.41338281	-13.74524609	-27.33569531
																			150	-7.831658447	-19.60951025	-25.57774512	-7.887417725	19.34577637	-9.479626953	-9.940643555	-12.57904907		3.480702637	-13.60551465	26.65676367	-13.8242998	-13.27805615	-27.27624414
																			151	-7.890335205	-19.27685352	-25.84727246	-7.129333435	18.66830078	-8.46395459	-10.27379443	-22.03649463		3.832256592	-13.4860752	27.83061523	-14.01521631	-13.60886621	-27.54479102
																			152	-8.013012207	-18.89619312	-25.3627998	-6.915249634	18.2273877	-6.744283203	-10.21794482	-31.47793799		4.467810547	-13.65438574	28.44846777	-13.84813281	-14.01767676	-27.83733984
																			153	-8.247688965	-18.22353467	-24.90232813	-7.221165405	17.80739648	-6.47061084	-9.957219727	-38.49538159		4.783364502	-13.5724458	28.66031934	-13.50104932	-13.83048633	-27.60188867
																			154	-7.890365723	-17.9748761	-24.69585352	-7.319081055	18.40928027	-6.056938965	-9.666620605	-43.08882715		5.138918701	-13.41525635	29.42216992	-13.83796631	-13.71129688	-27.63843555
																			155	-7.965041992	-18.03821753	-24.56338086	-7.008997314	17.65028906	-5.92726709	-9.724396484	-42.84226855		5.690472656	-13.19981641	30.77402246	-14.7488833	-14.09810693	-27.95498438
																			156	-8.151719238	-18.98555811	-24.4329082	-6.266913086	15.78586035	-8.355594727	-10.34704688	-33.22771387		5.630026611	-12.67812695	31.801875	-14.92779932	-14.34091748	-28.2795332
																			157	-8.114395996	-20.28089941	-24.42043555	-5.908829285	16.70313525	-8.95392334	-10.95669727	-17.44515552		5.301581055	-12.28193701	32.61372461	-14.51271631	-13.90772705	-28.13208203
																			158	-8.029072754	-20.67224121	-24.67796387	-6.014744995	17.5317373	-8.592250977	-11.45497266	-4.406601074		5.66113501	-11.75949756	33.51157617	-14.4736333	-13.6585376	-27.45662891
																			159	-7.911749512	-20.31558252	-24.75349121	-5.800661194	16.19740283	-8.72457959	-11.93399854	6.84795752		5.604688965	-11.15430762	34.01942969	-15.0985498	-13.73934766	-27.28517773
																			160	-7.890426025	-19.63092285	-25.29901855	-5.962576965	15.44261426	-7.268907227	-12.33864893	19.24650806		5.06824292	-10.43086792	33.8872793	-15.39346631	-13.23415771	-27.93772656
																			161	-7.869102783	-19.3662644	-25.81454395	-6.804492676	15.37602979	-7.107234985	-13.55429932	28.25306665		5.419796875	-9.362928223	33.30513086	-14.72838281	-12.57696777	-28.13427344
																			162	-8.087779541	-19.66560596	-25.51007129	-7.318408875	15.19856934	-7.377563721	-14.1962002	37.371625		5.93935083	-8.757739014	33.1429834	-13.8832998	-12.55177783	-27.65082227
																			163	-8.242456299	-20.29694727	-25.87959961	-7.560324646	15.00507861	-7.353891357	-13.98210059	48.89018359		5.862905273	-8.665299072	33.35083398	-13.3002168	-13.02258838	-27.55937109
																			164	-7.997132813	-21.12028711	-27.19712695	-7.842240845	14.30174414	-8.446219971	-13.88637598	55.28073413		5.818459229	-8.509609375	33.26668555	-13.0751333	-13.48739844	-27.61991992
																			165	-7.62380957	-21.61962939	-28.2966543	-7.996156616	13.48006494	-8.512547607	-13.34352637	55.01529248		5.962013184	-8.497169678	33.04653711	-13.1960498	-13.6682085	-27.92846484
																			166	-7.282486328	-22.2269707	-28.44018164	-7.766072266	13.18422998	-7.124875244	-13.18217725	52.46985107		5.781567627	-8.83047998	32.6363877	-12.81296631	-14.10501855	-28.43701367
																			167	-7.181163086	-22.70631104	-28.50370898	-7.663988525	12.90005127	-7.221203857	-13.44270264	46.42840918		5.533121582	-9.349290283	31.97624023	-11.9258833	-14.6598291	-28.1135625
																			168	-7.255839844	-22.43765283	-29.28323633	-8.265904297	12.67768506	-7.351531494	-13.64385303	32.55495996		5.748675537	-9.667850586	31.71809082	-10.7207998	-14.78663867	-27.98210938
																			169	-6.930516602	-22.46099414	-29.61276172	-8.979820557	12.6353501	-5.321860107	-13.28787842	14.99351855		5.988229492	-10.04916089	31.74594238	-9.545716553	-14.75944971	-28.1706582
																			170	-7.069193115	-22.46833545	-29.64429102	-9.413736084	12.91692139	-3.866187744	-12.6920293	0.184073242		6.067783447	-11.04997095	31.30379492	-9.610633301	-14.66625977	-27.51920703
																			171	-7.991869873	-21.80767529	-29.68981836	-9.351652344	13.19889893	-4.96851593	-12.45005469	-9.057368164		6.139337891	-11.78278125	30.52164551	-10.45555029	-14.59506982	-26.91575586
																			172	-8.146546631	-21.61901855	-29.5993457	-8.673568115	12.73743896	-5.036844116	-12.43245508	-19.09881348		5.922891846	-11.59434229	29.56149609	-11.00246655	-14.52987988	-26.83230273
																			173	-7.725223389	-22.0223584	-30.11487305	-8.211483887	11.347354	-4.463171753	-12.86285547	-30.67625537		5.414445801	-11.03515234	28.88934863	-10.9133833	-14.37268994	-26.72485156
																			174	-7.447899902	-22.23769971	-30.23240039	-7.805400146	9.923425049	-6.081500366	-12.77600635	-34.42170068		5.206000244	-10.7032124	29.1452002	-10.87430005	-14.0355	-26.65740039
																			175	-7.15457666	-22.01704102	-29.40792773	-7.471315918	10.81440259	-5.981828003	-12.03978174	-31.96714258		5.273554199	-10.56777295	29.85905078	-10.5892168	-13.49831055	-26.81394922
																			176	-7.133253418	-21.44038281	-29.05745508	-7.233231934	12.26794336	-4.97815625	-11.61168213	-24.15258789		5.089108154	-10.09008301	30.17690234	-8.814133301	-13.27312061	-26.92249609
																			177	-7.351930176	-20.98772412	-28.89498047	-6.659147827	12.67423291	-5.062484375	-11.60145801	-14.5140293		5.256662109	-9.695143311	30.53875586	-6.609050049	-13.31993066	-26.39904492
																			178	-7.186606934	-20.99106445	-28.37650781	-6.645063477	13.35911621	-4.872812012	-11.9849834	-5.459474609		5.368216064	-9.401453613	31.08460547	-5.531966797	-13.52874072	-25.69959375
																			179	-6.637283691	-21.65440625	-27.52003613	-7.070979736	13.10509424	-4.491140137	-11.90650879	6.779080078		4.859770508	-9.020764404	30.71045703	-5.506883423	-13.6295498	-25.36014063
																			180	-6.359960205	-22.31374658	-25.77356348	-7.256895508	11.98788428	-3.161468262	-11.34703418	15.53763818		4.571324463	-8.847074707	30.25430957	-5.771800293	-13.63436133	-25.03668945
																			181	-6.162636963	-22.04908789	-24.36909082	-7.402811768	11.17001807	-2.833796448	-11.26468506	21.56819678		4.530878418	-8.57913501	30.61416016	-5.976716797	-14.08517139	-24.76923828
																			182	-6.237313721	-21.6644292	-24.25461914	-7.660727295	10.87574561	-3.866124634	-11.50133594	31.35874707		4.446432861	-8.392445313	31.15801172	-6.365633545	-14.17798145	-24.52578711
																			183	-6.567990234	-21.867771	-24.84814648	-7.734643555	10.49716064	-2.348452148	-12.20136084	50.10130566		4.361986572	-8.511755127	31.68586328	-7.234549805	-14.07279102	-24.28233398
																			184	-6.322666992	-21.9591123	-26.22967383	-8.040559326	9.605044189	-0.304780273	-12.95376123	66.74785645		4.489540527	-8.73256543	31.84971387	-7.967466797	-14.12760156	-23.95888086
																			185	-6.12534375	-21.15045264	-26.87919922	-8.898475098	9.219802979	-0.357108398	-13.12041211	65.63442285		4.989094482	-9.173875977	31.34156641	-8.008383545	-13.94241162	-23.55542969
																			186	-6.344020508	-20.40579443	-26.07872656	-9.388391357	8.905374268	-0.595436523	-13.28443799	56.60097363		5.416648438	-9.790936523	30.73941797	-7.837300293	-13.85722168	-23.22397656
																			187	-6.162697754	-20.22513574	-25.33025488	-9.542307129	8.134789307	-0.859764893	-13.41158838	40.95153174		5.768202881	-9.881996582	30.21926953	-7.748217285	-13.43603271	-22.21252539
																			188	-5.677374268	-20.32847754	-24.89378223	-10.01622314	7.913235596	0.159907471	-13.14723828	21.42209033		6.411756836	-10.20805664	29.80912109	-7.579134033	-13.3568418	-21.20907422
																			189	-5.640051025	-20.63181787	-24.48330957	-10.56213916	8.790400635	1.475579102	-13.00788916	1.972640625		6.511311279	-10.53461719	29.75897266	-6.950050293	-13.46565283	-20.76562305
																			190	-5.858727783	-20.43115918	-23.99483691	-11.14805518	10.71094092	1.301251221	-13.12253955	-15.37280078		6.094865234	-9.720677246	29.51882324	-6.372967041	-12.94046191	-19.60216992
																			191	-5.757404297	-20.25050049	-23.42036523	-11.7579707	13.36151221	0.900923096	-12.65644043	-23.67024219		5.762419189	-9.416488037	29.3946748	-6.399883545	-12.67527295	-17.61471875
																			192	-5.160081055	-19.98984131	-22.92389063	-11.65588672	14.59811475	1.258595215	-11.54009082	-27.5196875		5.605973145	-9.44104834	29.76852734	-6.092800293	-12.30608252	-16.50726758
																			193	-4.418757813	-19.27718262	-22.35341797	-11.27380273	12.99609229	0.73226709	-10.81986621	-29.81712891		5.4015271	-9.463358398	30.35037793	-5.989717041	-12.13089307	-16.09581445
																			194	-4.093434448	-18.80052441	-21.87494531	-11.01171875	11.29456982	-1.100060791	-10.4315166	-32.26657422		4.869081543	-9.777418945	30.58422949	-6.654633789	-12.44170313	-15.50036328
																			195	-4.504111206	-18.66786523	-21.65247266	-10.34163477	11.45354736	-0.982388916	-9.956416992	-30.66001611		4.800635498	-9.693229004	30.10608203	-7.223550781	-12.32651318	-15.12891211
																			196	-4.994787842	-19.03520605	-21.34200098	-9.975550537	11.2015874	-0.912717163	-9.605442871	-25.10146143		5.028189453	-9.621789551	29.88193262	-7.768467529	-11.96932324	-14.86146094
																			197	-5.0054646	-19.51054785	-21.00352832	-10.00946631	10.28812744	-1.293045288	-9.08896875	-18.87890723		5.059743408	-9.749849609	30.4837832	-8.601383789	-11.4421333	-14.47400781
																			198	-5.000141357	-19.44988916	-20.52705469	-9.803382324	9.848073486	-1.467372925	-8.948618896	-9.408348633		5.439297852	-9.812409912	30.86363574	-9.384300293	-10.82094336	-14.20655664
																			199	-4.834817993	-19.29322949	-19.95658203	-9.68529834	9.144207275	-1.663701172	-8.546394043	-0.225790039		6.114851807	-9.784220215	30.5514873	-9.469216797	-10.68175342	-13.48310547
																			200	-4.589494751	-19.2285708	-19.74010938	-9.791214355	8.906434814	-0.858029297	-7.682294922	11.92476074		6.406405762	-9.540280518	30.43533789	-8.618133789	-10.83056396	-12.19165234
																			201	-4.504171448	-18.6759126	-19.2536377	-9.785130127	9.444506104	-0.760357422	-7.942320801	23.15531934		6.609959717	-8.949091309	30.89519043	-6.893050537	-11.14137402	-11.38820117
																			202	-4.402848145	-18.19925391	-18.45316406	-9.475046387	10.10626489	-0.064685547	-7.583345947	30.83387744		6.717513672	-8.856651611	30.90304199	-5.363967285	-11.68418408	-10.44074902
																			203	-4.365524902	-18.24259473	-18.23869141	-8.988962158	10.20083618	0.734986328	-6.467871338	45.20843604		6.549068115	-9.23171167	30.25489258	-4.982883911	-11.52099414	-8.925296875
																			204	-4.504201538	-17.82993555	-18.10621875	-8.91887793	9.448219971	-0.113341309	-6.722271973	53.67098633		6.84862207	-9.045771973	30.38674414	-4.221800537	-11.07380469	-7.673845703
																			205	-4.690878296	-16.95727734	-17.14574609	-9.160793945	8.71744751	0.266330566	-6.868547852	48.74954492		7.348176392	-8.572332275	30.9445957	-3.074717285	-11.34661475	-6.574393555
																			206	-4.397555176	-16.60061865	-16.32927344	-8.994709717	8.807612549	0.070002441	-6.179698242	40.36410352		7.407730347	-8.545142578	31.30244727	-2.453634155	-11.2554248	-5.730942383
																			207	-3.784231934	-17.13995947	-16.17480078	-8.828625977	9.302965088	-2.678325806	-5.858473389	27.9466543		7.499284302	-8.652202881	31.60829883	-1.090550659	-10.82823486	-5.807489258
																			208	-3.87490863	-17.95130078	-15.56832813	-8.950541748	9.017317627	-3.638653931	-6.050374268	15.15321289		7.646838257	-8.632513184	32.39215039	0.046532593	-11.08304492	-4.996037109
																			209	-4.477585388	-17.88264209	-14.81785547	-8.55245752	8.234201416	-3.332981567	-6.504524414	5.367770996		7.766392212	-8.527823486	34.14400391	0.171615967	-11.28785498	-3.552585938
																			210	-4.904262085	-16.92998242	-13.54338281	-8.066373779	6.931459961	-3.991309692	-6.518800293	-7.433674316		7.861946167	-8.364633545	35.56985352	0.128699219	-10.98866553	-3.197133789
																			211	-5.138938721	-16.14932422	-12.01291016	-8.132289307	5.25596875	-3.821637817	-6.376325684	-19.14711621		7.84950061	-8.355193848	36.19170313	0.101782593	-10.70747559	-2.505682617
																			212	-5.405615479	-15.71666553	-11.0044375	-8.390205566	4.836665039	-4.471966064	-6.50647644	-27.71656152		8.125054565	-8.21575415	36.60955859	0.554865723	-10.55028564	-1.854230469
																			213	-5.816292236	-15.12800732	-9.777964844	-8.360121338	5.552392578	-5.758294189	-6.854376709	-37.83000488		8.208608887	-8.065314453	37.3594082	0.715949219	-10.5910957	-1.978779297
																			214	-6.162968872	-14.93934766	-8.445491211	-7.810037598	6.001057373	-5.698621826	-7.236026978	-46.59944824		8.272163086	-8.131625244	38.87325781	0.759032349	-10.48390625	-1.319327148
																			215	-5.77364563	-15.46268921	-8.251019531	-7.403953369	5.64387915	-5.126949951	-6.839802734	-49.61689355		8.395716797	-8.240185547	39.78511328	1.796115723	-10.25071631	-0.683875
																			216	-5.176322266	-15.71403027	-8.956546875	-7.165869141	4.732043945	-5.497278076	-6.310453613	-46.53033496		8.343270752	-8.554245605	39.93096094	2.897198975	-10.00552637	-0.904422852
																			217	-5.362999023	-15.74537207	-8.918074219	-6.863785156	3.675271729	-6.913606201	-6.106228882	-37.88377686		8.930824707	-9.197306152	40.3568125	2.854282471	-9.634336426	-0.676970703
																			218	-5.565675781	-15.32871289	-8.673600586	-6.937700928	2.673405273	-6.657933838	-5.89250415	-20.85322266		8.898378662	-9.674616211	40.44066602	1.485365601	-9.641146484	-0.577519531
																			219	-5.240352539	-14.77205371	-8.06512793	-7.219617188	1.634320374	-5.982262085	-5.697779907	-3.550667969		7.901933105	-9.787676758	40.47251563	-0.427551025	-9.641956787	-1.694067383
																			220	-5.075029175	-14.96739551	-6.532655762	-7.877532959	-0.014295776	-5.932590088	-5.748930664	9.791890625		7.917487061	-10.01248682	41.25836719	-1.458467651	-9.770766602	-1.714616211
																			221	-5.117705811	-14.77473633	-5.372183105	-7.79144873	-1.781255798	-5.478918213	-5.769205994	23.07044922		7.977041016	-10.38354736	42.4682207	-1.373384338	-10.46957666	-0.063164063
																			222	-5.272382568	-14.61007715	-4.601709961	-7.08936499	-3.195684448	-4.50924646	-5.604981262	28.445		7.808595459	-10.62085791	43.68207031	-0.570301025	-10.85638745	1.276287598
																			223	-5.331059326	-14.92941895	-3.069237305	-7.275280518	-4.737582275	-3.505574585	-5.46575708	29.81955859		7.944149414	-10.31391797	44.74392188	0.218782227	-10.52919751	2.007739258
																			224	-5.197736084	-14.40475977	-1.568764648	-6.869196777	-5.862416748	-3.099902222	-5.178532837	27.0661167		8.031703369	-9.727978516	45.38177539	0.807865601	-10.34800757	2.379190918
																			225	-5.28841272	-13.65210083	-1.612291992	-6.199112549	-6.733939697	-1.994230469	-5.333808105	15.50466748		8.619257324	-9.374788574	45.989625	2.076948975	-10.55281763	2.462643555
																			226	-5.443089478	-13.25944238	-2.969819336	-5.865028809	-7.930430664	-1.386558594	-5.485208496	10.56722559		8.730811279	-8.884098633	46.93747852	2.702031982	-10.50162817	2.082095703
																			227	-5.437766113	-12.55878369	-4.40134668	-5.274944458	-8.118609375	-1.966886719	-4.971609192	12.36578418		8.514365723	-8.56040918	47.54132813	1.749115479	-10.89643823	1.381546875
																			228	-4.984442871	-12.08612524	-5.082874023	-5.244860474	-8.209569336	-0.9692146	-4.749134521	1.516342773		9.117919678	-8.365719482	47.75117969	0.74419873	-11.78924829	0.976999023
																			229	-4.355119568	-12.62546582	-4.950401367	-5.334776489	-9.758310547	0.044457214	-5.139660278	-23.70910254		9.393473633	-7.738779785	48.1730332	0.659282104	-11.86805835	0.412450195
																			230	-4.829796265	-13.40880713	-4.641928223	-5.160692383	-10.48489551	-0.641870605	-5.191935547	-39.48654785		9.233028076	-7.446840088	48.67488281	1.378365234	-11.63486841	-0.392097656
																			231	-5.832473022	-13.69214771	-5.123456055	-5.314608154	-9.708261719	-0.620198792	-4.770336426	-43.18398975		9.684582031	-7.835900391	49.06273438	2.13144873	-11.81967871	-0.852645508
																			232	-6.179150146	-13.84348926	-5.62898291	-5.68452417	-9.32087793	-0.460526978	-4.403486572	-56.40943506		10.04413599	-8.121710693	49.30458594	2.204531982	-11.84848828	-1.201194336
																			233	-6.26982666	-13.74283081	-5.152510742	-5.438440063	-9.566369141	-1.328855103	-4.037762451	-70.89088086		10.00368994	-7.513020752	49.4804375	1.607615479	-11.75929932	-1.549742188
																			234	-6.008503418	-13.22217212	-4.612037598	-4.920356079	-9.313641113	-1.427182739	-4.49928772	-73.55632227		10.2072439	-7.034831543	49.47828906	1.020698486	-11.86410889	-1.746291016
																			235	-5.251180176	-12.66951367	-4.19156543	-4.634272095	-9.047664063	-0.987510925	-5.151563477	-72.15776367		10.66679785	-7.80364209	49.04414063	0.70778186	-11.88691943	-1.862837891
																			236	-4.909856812	-12.36085498	-3.443092285	-4.300187988	-9.571374023	-2.059838989	-4.714588867	-62.90320898		11.03035205	-8.057951904	48.96399219	0.432865234	-11.79972925	-1.771386719
																			237	-4.632533447	-12.32419556	-2.776619629	-4.26210376	-9.807677734	-3.052167236	-4.360489624	-45.4006543		10.68190625	-7.492512207	49.59184375	0.705948608	-11.48453955	-1.07993457
																			238	-3.875210205	-12.56353613	-2.232146973	-4.792019775	-9.120043457	-2.220495361	-4.454139893	-33.63409814		10.29746045	-7.60757251	50.35769531	1.853031738	-11.46134912	-0.468483398
																			239	-3.517886932	-12.87087744	-1.585674316	-5.161935791	-8.173097656	-1.124822998	-4.293540405	-27.0915415		10.49701465	-7.785633301	51.42954688	2.532115234	-11.98216016	-0.30503125
																			240	-3.368563599	-13.05421875	-0.91520166	-4.627851807	-7.560713623	-1.411151123	-3.985190918	-13.8609873		10.19656836	-7.466943604	52.67739648	2.201198486	-11.72096973	-0.133579102
																			241	-3.363240356	-12.84956055	-0.426729004	-3.9497677	-7.188861084	-2.161479248	-3.881966553	4.761571289		9.656122559	-7.428503662	53.80925	1.568281982	-11.49978003	-0.21012793
																			242	-3.213917053	-12.33690186	-0.172255859	-3.575683594	-6.889258545	-1.671807373	-3.730867065	20.64812988		9.92767627	-7.716313965	54.81910156	1.20536499	-12.04258984	-0.294675781
																			243	-2.39259375	-12.26824341	-0.015783691	-2.921599365	-7.018843506	-1.454135559	-3.770517578	29.10268066		10.44323096	-7.664374023	55.42295117	1.882448486	-12.48140039	-0.027224609
																			244	-2.035270508	-12.10758398	0.246689453	-2.203515335	-7.447928467	-2.610463257	-4.329918091	30.80523926		10.36678467	-7.48493457	55.91280469	2.847531738	-12.68020996	0.680228516
																			245	-2.205947205	-11.73492529	0.693161865	-1.789431313	-7.904294678	-3.794791382	-4.532443359	32.65179785		10.49433887	-7.499244873	56.31865625	3.28461499	-12.389021	0.771679688
																			246	-2.056623901	-11.66626587	1.007634766	-1.95934729	-8.712973145	-4.597119629	-4.234219238	30.79435596		10.74589307	-7.443805176	57.01050586	3.455698242	-12.38983057	0.351131836
																			247	-1.763300903	-11.67360742	1.142107178	-2.449263306	-9.523339844	-4.833447754	-3.898619751	16.62490674		10.65744702	-7.310115234	57.70835742	3.192781738	-12.52864111	0.618583984
																			248	-2.045977539	-11.74094873	1.076580078	-2.659179138	-9.623768555	-4.869775879	-3.802020264	-4.752535156		11.04100098	-6.928175781	57.90821094	2.23786499	-12.15145068	0.862035156
																			249	-1.960654297	-11.46029028	0.577052979	-2.341094971	-9.061478516	-5.260103516	-4.215420776	-22.72198047		11.46055469	-6.57648584	58.80206055	2.310948242	-12.17626123	1.273487305
																			250	-1.411330933	-11.52363184	0.337525391	-1.543010925	-8.614469238	-6.122431641	-4.416071289	-41.13142188		11.62410889	-6.458546143	59.77191211	3.688031738	-12.4050708	1.524938477
																			251	-1.502007568	-11.70697217	0.623998535	-1.10492688	-8.635179688	-6.470759766	-4.058221924	-58.33286719		11.73566309	-6.028606689	60.02976563	4.14711499	-12.38588184	0.800390625
																			252	-1.960684265	-11.16631372	0.988470947	-1.098842896	-9.03482666	-4.927087891	-3.625622437	-65.90230884		12.05121729	-6.138916992	60.32361523	4.044197998	-12.38069189	0.363841797
																			253	-1.779361023	-11.0976543	1.462943604	-1.43675885	-9.377224609	-4.555416016	-3.109147705	-73.13575049		12.710771	-6.134227539	60.7374668	4.271281494	-12.23350195	0.871294922
																			254	-1.16603772	-11.24099561	2.15741626	-2.054674683	-9.09927832	-5.605743652	-2.457548462	-84.84119971		12.48632568	-5.533537842	61.06531836	4.598364746	-11.85831201	1.274746094
																			255	-0.904714478	-10.95233716	2.843888916	-2.408590698	-8.330582031	-5.372071777	-1.99219873	-91.87464136		11.91787988	-5.630098145	61.29116992	4.653447998	-11.74512207	1.270198242
																			256	-1.155391113	-10.93167871	3.312361572	-2.418506714	-6.819760498	-5.414399902	-1.829849365	-87.05208301		12.16543359	-5.220658203	60.99302148	4.052531494	-11.81793213	1.073650391
																			257	-1.486067993	-10.94702002	3.234834473	-2.004422485	-5.391564697	-6.734728027	-1.534124756	-74.51753223		12.3969873	-4.301218506	60.29487305	3.217614746	-11.56274219	1.173101563
																			258	-1.608744629	-10.4583606	2.957307129	-1.830338501	-4.951899658	-7.245056152	-0.775150391	-56.34297363		12.4525415	-4.474528931	59.99272266	2.874697998	-11.49155273	1.984553711
																			259	-2.083421387	-10.15370215	3.371779785	-1.248254395	-5.163203369	-6.421384033	-0.265176147	-33.95241528		12.5800957	-4.724589355	60.33857617	3.227781494	-11.50836279	2.820004883
																			260	-2.446098083	-9.929042969	3.894252441	-0.442170372	-6.065194336	-6.717712158	-0.703701416	-18.45786084		13.0916499	-4.161899658	60.67442773	4.306864502	-11.13917285	3.047457031
																			261	-2.504774841	-9.232384033	3.714725098	-0.868086273	-6.803279297	-6.526040039	-0.948602051	-11.60330225		13.49920361	-3.568209717	60.58427734	4.259947998	-10.9339834	2.978908203
																			262	-2.963451538	-9.567725586	3.281197754	-1.102002197	-6.478270508	-6.624368164	-0.499752441	-7.404747803		13.1907583	-3.305270325	61.12413086	2.42903125	-10.93479346	3.150360352
																			263	-3.566128235	-9.971066895	3.305670654	-0.887918167	-5.695449219	-7.970696289	-0.728278076	-4.702189209		13.1463125	-3.535330444	61.81398242	1.110114746	-11.02360352	3.721813477
																			264	-3.848804932	-9.182407959	3.042143555	-1.081834076	-4.832721924	-6.889024658	-1.615553589	-3.711634766		13.27386621	-3.627890747	61.76983203	0.247197998	-11.02441357	3.957264648
																			265	-3.635481689	-8.497748901	3.110616211	-1.051750061	-4.225181885	-7.325352295	-1.677329102	-3.121076172		13.08141992	-3.484451172	62.12568359	-0.303718811	-10.68522363	3.776716797
																			266	-3.390158356	-7.773090393	4.023088867	-0.78166597	-4.321704346	-9.373681152	-1.322604736	-7.274521729		13.02897412	-3.993011475	63.16553711	-0.156635437	-11.31203369	3.996167969
																			267	-3.576835083	-7.400431396	4.605561523	-0.991581909	-4.563601807	-8.542008789	-1.057630249	-14.98796729		13.18452881	-4.305071838	63.77338867	0.928447876	-11.93884375	5.087620117
																			268	-3.90751178	-7.443772827	5.07803418	-1.217497772	-4.650436768	-8.252336182	-0.790780762	-21.29340869		13.20408203	-3.830132202	63.69923633	2.45953125	-11.85965381	6.299071777
																			269	-3.870188507	-7.68311377	5.11850708	-1.147413742	-4.378302612	-8.186664795	-0.823556274	-33.81485205		13.33563672	-3.943942261	63.3450918	2.514614502	-12.40046436	7.118523438
																			270	-3.880865204	-7.910455322	4.734979614	-0.62932972	-4.022294067	-6.288992676	-0.876331909	-56.28829565		13.81118994	-4.473752686	62.89094336	1.555697754	-12.44127441	7.905975586
																			271	-4.179541931	-7.469796265	5.161452271	-0.391245636	-4.45000415	-6.027320801	-1.507107422	-80.29774512		14.20274463	-4.838812988	62.92279297	-0.171218872	-12.22608447	8.229427246
																			272	-4.382218628	-7.401137207	6.187925049	-0.92916156	-4.864807861	-7.359648926	-2.013507935	-96.61918652		14.35429883	-5.264623291	63.38464453	-2.89813562	-12.11489453	8.296878906
																			273	-4.568895386	-7.20847876	6.834397705	-1.035077484	-4.528205322	-7.001977051	-1.875283325	-103.8526282		14.25785254	-5.194683838	63.97449805	-5.475052246	-11.64170459	8.500330566
																			274	-5.139572021	-5.83182019	7.204870361	-0.988993439	-3.748852783	-6.098305176	-2.18143396	-104.2860696		14.30540625	-5.174494141	64.3723457	-7.315968994	-11.31451514	8.983783203
																			275	-5.806249023	-5.191161133	6.921343262	-0.798909363	-2.953281494	-6.336632813	-2.515459595	-100.0635112		14.57696045	-5.488304443	64.30219922	-7.100885498	-11.1513252	9.283234863
																			276	-6.280925415	-5.566502197	5.621815918	-0.608825348	-3.018116455	-6.150960938	-2.721859863	-94.91296057		14.30851563	-5.300364502	64.27405273	-5.18180249	-11.12813525	9.198686523
																			277	-6.211602661	-5.429843628	4.930288574	-0.402741241	-3.488045166	-5.541289063	-2.899385376	-81.8984021		13.78806836	-5.368424805	64.00190234	-4.568718994	-11.15094531	9.578138184
																			278	-6.254278931	-5.02118512	5.34276123	0.203342834	-3.373442627	-6.235617188	-2.671410889	-55.37184753		13.85562305	-6.215485107	63.65375391	-4.557635742	-11.36975537	10.18958984
																			279	-6.264956055	-4.844525635	5.937233887	0.209426941	-3.080277588	-7.579945313	-3.022686401	-29.66928906		14.03117725	-6.751045654	63.50360547	-4.114552612	-11.49856543	10.89704199
																			280	-5.731632568	-4.487867065	6.423706543	0.439510956	-3.070175049	-7.700272949	-3.752086975	-10.5427345		13.73073145	-6.876605957	62.94145703	-3.769469116	-11.03337549	11.83649365
																			281	-5.518309326	-4.159208496	6.622179199	0.997595032	-2.978509888	-6.694601074	-3.883987549	5.447823975		13.63828516	-7.115416504	62.67330859	-2.692385864	-10.92018604	12.81594531
																			282	-5.608985718	-3.894549561	6.4346521	1.003679047	-2.992032471	-6.570929199	-3.546513062	18.49438232		14.34183887	-7.095726318	62.98316016	-1.75730249	-11.42499609	13.56339795
																			283	-5.747662964	-3.981890503	6.201124756	1.097763153	-2.921492432	-6.969257324	-3.051038574	26.14093311		14.75739404	-6.824286621	63.34901172	-1.814218994	-11.46180615	14.08684961
																			284	-5.422339111	-5.017231995	6.031597412	1.231847229	-1.803296143	-6.765585449	-3.280189087	27.87549146		14.24494727	-6.514597168	63.63886328	-2.185135986	-11.58461621	14.85830127
																			285	-4.953016357	-5.560573486	5.600070068	0.917931305	-0.273631042	-6.599913086	-3.697714722	29.40204993		14.33250195	-6.397657471	64.05071484	-3.018052612	-11.89542627	15.42975293
																			286	-4.97969281	-5.575914429	5.432542725	0.46001535	0.506627747	-6.256241455	-3.610490234	27.25660059		14.78005469	-6.457467773	64.50056445	-3.896969238	-11.7782373	15.72120459
																			287	-5.246369507	-5.499255371	5.715015747	0.194099426	-0.219300964	-6.36656958	-3.547265747	13.58315906		14.38760986	-6.637778076	64.77441797	-4.297886108	-11.80504688	16.34065625
																			288	-5.177046021	-4.618596924	5.601488159	-0.039816467	-1.576729736	-6.374897949	-3.48391626	-11.97028247		14.19916406	-6.852088379	64.92827148	-3.632802612	-11.57985742	17.2401084
																			289	-4.851723206	-3.917937866	5.48196106	-0.089732483	-1.639533447	-5.227226074	-3.436441772	-32.15572791		14.51071777	-6.487148682	64.66011914	-0.78171936	-11.32666699	18.50755957
																			290	-4.766399414	-3.805279297	5.718433716	-0.131648376	-0.597274597	-4.799553467	-3.322092407	-38.27717334		14.46227148	-6.324208984	64.0299707	2.407364014	-11.51547754	19.80701172
																			291	-4.905076599	-3.320620361	6.20090625	-0.077564331	0.449921692	-6.059881592	-2.89711792	-43.25461487		14.27382568	-6.326769287	63.51782422	4.26644751	-11.07628711	20.33046387
																			292	-5.011752808	-2.747961548	6.81737915	0.344519775	1.01177417	-6.158209961	-2.959268433	-52.9440564		14.30138086	-5.880829834	63.24967383	4.647530518	-10.52109766	20.42191602
																			293	-5.102430054	-2.891302734	7.135851563	0.526603821	1.471345459	-5.544537842	-3.620293945	-61.46550183		14.42493359	-5.602390137	62.84152539	3.858614014	-10.11790771	20.60936816
																			294	-5.017106262	-3.322644043	7.342324707	0.252687897	1.577979248	-6.748866211	-3.846944519	-58.58694727		14.06448828	-5.345700439	62.89737891	3.387697266	-9.600718262	20.78881934
																			295	-4.659783203	-3.069985229	7.504797119	0.058771942	1.307894348	-7.183193848	-4.428469788	-56.72438892		13.49604248	-5.384510498	63.95522852	3.350780762	-9.507527832	20.82427148
																			296	-4.526459961	-2.625326172	7.41327002	0.064856018	1.185465637	-5.907521973	-5.713245605	-65.57383044		13.64359619	-5.600820801	65.08707813	3.99586377	-9.554338867	21.02772266
																			297	-4.329136658	-2.652667725	6.945742432	0.022940079	0.378786926	-5.333850098	-6.321646362	-65.56727979		13.62315039	-5.175381104	66.03093164	5.412947266	-9.395148682	21.2071748
																			298	-4.259813599	-2.412008545	6.228215332	0.413024139	-0.375985535	-5.028178223	-6.241296143	-47.59272119		13.4987041	-4.675941528	67.12478125	5.700030273	-9.08995874	21.31462598
																			299	-4.270490356	-2.271349854	5.720687988	0.4271082	-0.565132996	-4.318506348	-6.246947021	-22.73816284		13.65025928	-4.587751953	67.96463281	4.95511377	-9.032768799	21.15007813
																			300	-3.753166992	-2.54669104	5.663160645	-0.446807709	-0.930186707	-4.350833984	-6.574722778	-5.171608398		13.8738125	-4.965062256	68.64648828	4.244197021	-8.841578857	20.64953027
																			301	-3.587843719	-2.694032349	5.889633301	-0.648723633	-1.128990479	-4.241162109	-6.618123047	6.002946289		14.5773667	-5.398372559	69.66033984	3.199280518	-8.632388916	20.50898242
																			302	-3.902520447	-3.053373535	5.640106201	-0.29063958	-0.877512878	-3.961490234	-6.009648804	14.00150464		14.9809209	-5.958682861	70.8741875	1.84036377	-8.607198975	20.32843359
																			303	-4.009197144	-3.340714722	5.066578857	-0.140555511	-0.88569165	-3.459818481	-5.781674072	20.41606323		14.6604751	-6.67174292	71.47204297	1.399447266	-8.548009033	19.81988574
																			304	-4.05187384	-2.74405603	5.147051514	0.273528564	-1.623370361	-2.032146606	-5.894199829	27.63061377		14.59202881	-6.722553467	71.69989453	1.838530273	-8.868819092	19.32733789
																			305	-4.238550568	-1.839397217	5.48752417	0.231612614	-2.202174072	-1.968474487	-5.88197522	29.21317224		14.83958301	-6.51236377	72.69774219	2.34161377	-9.121629639	19.13878906
																			306	-4.665227295	-1.670738525	5.89999707	-0.338303345	-1.951509033	-3.01480249	-5.877000488	21.45173071		14.67113672	-6.548424072	73.99159766	3.090697021	-9.012439697	19.63824121
																			307	-4.771904053	-1.838079468	6.352469482	-0.412219238	-1.208156494	-1.727130493	-5.430651245	12.50628918		14.37069043	-6.627484375	75.49544922	3.719780273	-8.933250244	20.07369287
																			308	-4.798580688	-1.649420654	6.542942383	0.081864746	-0.626178955	-0.741458679	-5.387926758	7.392839844		14.11824561	-6.556794678	76.78129688	3.968863525	-8.856060303	20.26914453
																			309	-4.553257446	-1.840761963	6.745415039	0.535948914	-0.517763916	-1.887786865	-5.805577393	-8.264601685		13.92179883	-6.630854736	76.94115234	3.285947021	-8.592870361	20.69659668
																			310	-3.923934143	-2.188103027	6.667887695	0.918032959	-0.765911377	-1.678114746	-5.561102905	-31.47404517		13.94935352	-6.709415283	76.34100391	2.315030273	-8.25768042	21.02004883
																			311	-4.04661084	-1.527444336	6.184360596	1.404116974	-1.142715088	-1.312442871	-5.037378418	-42.73148877		14.52490723	-6.317725586	75.34685156	2.038113403	-7.986490479	21.09550098
																			312	-4.345287537	-0.794785645	5.916833008	1.458201111	-1.505800049	-1.602770752	-4.645903931	-49.97293408		14.91646143	-5.723786133	74.97870703	1.815196777	-7.613300781	21.05095215
																			313	-4.307964233	-0.734126709	5.821305908	1.264285149	-1.89138501	0.038901123	-4.576179443	-55.39037573		14.82801563	-5.855846436	74.72855859	2.522280273	-7.09211084	20.8624043
																			314	-4.398640991	-1.317468018	5.369778564	0.926369171	-1.810907471	2.55657312	-4.617205078	-53.55982104		15.17556934	-6.341156738	73.40440625	3.215363525	-6.790920898	20.92185547
																			315	-4.457317688	-2.432809204	5.042251221	1.044453262	-1.761742432	1.594245117	-4.466105591	-52.8732627		15.35512402	-6.115216797	72.34026172	3.354446777	-6.351731445	21.11730762
																			316	-4.467994385	-3.048150269	5.154723877	1.714537354	-2.440327393	-1.288082825	-3.746131104	-46.93070801		15.24667725	-6.2077771	71.47611328	4.521530029	-6.188541504	21.06475879
																			317	-4.606671143	-2.995491699	4.987196533	2.224621338	-2.669162354	-2.390411011	-2.933406616	-34.92414966		15.23423242	-6.114337402	69.88596094	4.792613037	-6.429351563	21.08421094
																			318	-4.681347778	-2.710832642	4.681669434	2.590705505	-2.761747314	-2.804739136	-3.121057007	-21.70159509		14.74178516	-5.289147705	68.4278125	4.067696777	-6.070161621	20.40766357
																			319	-4.340024536	-2.562173828	4.248141846	2.900789551	-3.151988525	-2.617067261	-3.219207703	-6.599036621		14.42533984	-5.166958008	67.16166797	3.278779785	-5.838971924	19.35511523
																			320	-4.062701477	-2.601515137	3.638614746	2.754873535	-3.186073486	-2.315395508	-3.055858032	6.423518066		14.94089404	-5.680518555	66.07351563	2.249863281	-5.761781982	19.14256738
																			321	-4.041378174	-2.712856445	3.383087402	2.192957611	-3.057689697	-2.375723145	-3.203508545	22.39007642		15.10444824	-6.074578857	65.68136523	1.968946533	-5.470592041	19.37001855
																			322	-3.828054932	-2.62019751	3.451560059	2.159041626	-3.140118408	-2.23005127	-2.796409058	37.76462695		14.66000195	-6.31763916	65.25522266	2.228030029	-5.419402344	19.5574707
																			323	-3.742731384	-2.563538818	3.896032715	2.3491259	-3.056140869	-1.596379395	-2.327059692	41.61918555		14.39955615	-6.363449219	64.62707031	2.425113037	-5.462212402	19.22492236
																			324	-3.993408325	-2.906880005	4.550505371	2.203209808	-2.63203833	-0.670707275	-2.216335327	41.1777439		14.39111084	-5.987759766	64.16691992	2.458196533	-5.145022461	19.17237402
																			325	-4.100085022	-2.810221191	5.404978394	2.121293945	-2.490467041	-2.351035645	-1.355235718	37.23230249		14.24266406	-5.791320068	63.34277344	2.671279785	-4.513832764	19.45582568
																			326	-4.158761719	-2.8495625	5.475451172	2.311377991	-2.448708252	-3.717363281	-0.61163623	27.75085303		14.08221875	-5.923630371	62.496625	3.288363281	-4.492642822	19.59527734
																			327	-3.977438477	-2.988903442	5.025923828	2.525462036	-2.067761963	-2.331691406	-0.936286743	20.70941162		13.66177246	-5.727690674	61.85247656	3.917446289	-5.021452881	20.58272949
																			328	-4.036115173	-2.556244629	4.974396484	2.403546021	-1.908628296	-3.196019592	-0.847437256	11.64396997		13.01332666	-5.535000732	60.85832813	4.162529541	-5.556263184	21.48218164
																			329	-4.22279187	-2.411585938	5.076869141	1.99363031	-2.113025757	-4.528347656	-0.101337891	-3.413475342		12.47288037	-5.601311279	60.15417773	3.643613281	-5.885073242	21.76563379
																			330	-3.897468567	-2.622927124	5.193341553	2.263714325	-1.754704468	-3.294675781	0.195761597	-24.7589209		12.20043457	-5.403371582	59.74003125	2.932696533	-5.603883301	22.39308496
																			331	-3.444145294	-2.894268311	4.723814697	2.55779834	-0.902164429	-2.46700354	0.050236084	-40.50436243		12.25998828	-5.363181885	58.70588281	2.155779541	-5.524693604	22.52453711
																			332	-3.246822021	-3.365609619	4.952287109	2.003882385	-0.79178064	-3.675331665	0.164585571	-46.72180786		11.64354248	-5.302742432	57.59773242	1.048863037	-6.301503662	22.18398828
																			333	-3.289498718	-3.780950806	5.73876001	1.697966492	-1.512396851	-4.73165979	0.185435059	-61.37124939		10.93109668	-4.816302734	57.51558594	0.771946411	-6.522313965	22.12344043
																			334	-3.124175415	-3.892291992	5.879232666	1.600050476	-1.673919312	-5.101988037	-0.170465576	-72.32469482		10.58265137	-4.678362793	58.2394375	1.095029785	-6.183124023	21.91089258
																			335	-2.654852112	-3.335633301	6.211705566	1.462134583	-1.427754211	-5.814316162	-0.120616089	-73.59813635		9.922205078	-4.527173096	58.33928906	1.446112915	-5.781934082	22.01834375
																			336	-2.53752887	-2.470974243	6.912177979	1.292218597	-1.780964172	-5.512643799	0.259233398	-67.63958582		9.485759033	-3.936733398	56.90113867	2.039196289	-5.254744141	22.24579688
																			337	-2.836205811	-2.70631543	7.670650879	0.618302704	-2.498861694	-4.688971924	0.650207764	-48.81702734		8.881312988	-3.534293823	55.14299219	2.098279419	-5.155554443	22.20124805
																			338	-2.894882507	-2.929656738	7.945123291	0.41638678	-3.101727783	-4.555300049	0.910432373	-35.03446875		8.172866943	-3.140354126	54.13884375	1.487362915	-4.878364502	21.9807002
																			339	-2.713559204	-2.924997925	7.327596191	0.718470825	-3.339968994	-2.939628174	0.861031738	-22.91591431		8.000420898	-2.840164429	53.63469336	1.308446045	-4.797174805	21.79215137
																			340	-2.740235962	-3.500339111	6.838068848	0.388554901	-3.591678955	-0.937956055	0.609131348	-4.413355713		7.899975342	-3.311224854	53.52854688	1.905529541	-4.781984863	21.91560352
																			341	-2.782912659	-4.007680359	7.110541504	0.298638977	-4.123888916	-2.76828418	0.524605957	15.08119873		7.603529297	-3.691285034	52.58239844	2.416612793	-4.424794922	22.32705566
																			342	-2.681589355	-4.019021606	7.541014404	0.544723083	-4.266848877	-5.676612305	0.621205444	31.65575708		6.823083496	-3.429845337	51.17424805	2.293696045	-4.64560498	22.69850684
																			343	-2.676266052	-3.722362793	8.043486816	-0.209192932	-3.619715088	-5.77494043	0.583804932	32.88631567		6.874637451	-3.22390564	50.00209961	2.104779297	-5.404415283	22.46995898
																			344	-2.43094281	-3.301704041	8.671959961	-0.85910878	-2.908206421	-4.271268555	0.410279297	30.87686633		7.44619165	-3.103715942	48.97794922	2.183862793	-5.589225342	21.86541016
																			345	-1.881619507	-2.137044922	9.000432129	-0.74902475	-2.359041382	-4.81759668	0.282378906	30.6594248		7.029745605	-3.069526367	48.70780469	2.590946045	-5.436035645	21.6368623
																			346	-1.716296143	-0.80438623	8.566905029	-1.182940726	-1.463407593	-5.333924316	0.642103271	18.74598315		6.769299805	-3.43308667	48.42965625	2.768029297	-5.810845703	21.52031445
																			347	-1.8549729	-0.087727661	7.62737793	-1.456856583	-0.612305054	-3.226252441	1.078952637	10.07253381		6.756854004	-3.437147034	47.45550391	1.713112549	-6.075655762	20.9077666
																			348	-1.785649597	-0.547068604	7.269850342	-0.962772556	-0.608890076	-2.676580566	1.554302246	4.175092285		6.680407959	-2.571957275	46.28135938	0.692196045	-6.15046582	20.24721777
																			349	-1.652326355	-1.794409912	7.228323242	-1.100688538	-1.160068787	-3.840908691	2.063151611	-9.818349243		6.983961914	-2.027767456	46.14120898	0.307279419	-6.115276123	20.11466992
																			350	-1.711003052	-2.693751099	7.842795654	-1.558604401	-1.528372437	-5.039236816	1.875626221	-17.46779468		7.111515869	-2.056827881	46.09105859	0.938362549	-6.002086182	20.18212207
																			351	-1.961679749	-3.421092285	9.655268555	-1.624520386	-1.703707397	-4.791564453	1.337850586	-24.87723621		6.51107019	-1.745638184	45.23691406	2.601445801	-6.006896606	20.12157324
																			352	-1.572356445	-3.424433594	11.2097417	-1.77843634	-1.928167358	-3.459892578	0.408075073	-40.42268164		5.898624146	-1.153948547	44.53476367	3.380529053	-6.149706543	19.66102539
																			353	-1.487033203	-2.755774658	12.41821387	-1.996352173	-2.210221069	-3.494220703	-0.621575562	-46.06412317		5.922178101	-0.558258911	44.03061328	3.123612793	-6.228516602	18.91247656
																			354	-1.7057099	-2.483115967	13.55668652	-2.318268188	-2.51868103	-3.416548828	-1.253976074	-41.0335686		6.133732178	-0.364819092	43.06446875	2.702695801	-5.719326782	18.55592871
																			355	-1.316386597	-1.838457153	14.63115918	-2.320184143	-2.861797241	-2.412877197	-1.956876587	-37.64301404		5.869286377	-0.556629517	42.10831836	2.753779053	-4.938137085	18.83138086
																			356	-1.167063293	-1.31779834	15.57963232	-2.210099976	-2.696475952	-2.657204834	-2.3364021	-33.34045557		5.804840332	-0.815939697	42.00216797	2.442862549	-4.536947144	19.81083301
																			357	-1.08173999	-1.661139526	16.03410547	-2.700015991	-1.888310913	-3.481532959	-2.394052612	-29.78189917		5.740394531	-0.899250122	42.00002344	1.489945923	-4.715757446	20.53428516
																			358	-1.012416748	-2.120480713	15.87057813	-3.093932007	-0.989770996	-3.963861084	-2.341953247	-27.35134265		4.795948364	-0.764560425	41.85587109	1.323029053	-4.842567505	20.66573633
																			359	-0.863093384	-2.44782196	14.8590498	-3.031847778	-0.764855957	-3.824189209	-2.32360376	-18.00078809		4.439502563	-0.728620728	40.87972461	1.318112305	-4.869377563	20.88518848
																			360	-0.793770203	-2.319163147	14.20352295	-3.105763794	-0.765472046	-3.148517334	-2.90312915	-4.226229614		4.935056641	-0.398931061	39.85957617	0.859195801	-5.130187683	20.48863965
																			361	-1.18844696	-1.942504333	14.39399609	-3.20367981	-0.650744507	-3.180845215	-2.993904663	7.324328857		4.78661084	-0.313991333	40.30742578	-0.397721069	-5.182997742	19.9960918
																			362	-1.359123718	-1.613845459	14.48646875	-3.477595703	-1.13886084	-1.21117334	-2.651555298	17.65087952		4.346164673	-0.911801636	40.4852793	-2.080637695	-4.96180835	19.97554297
																			363	-1.545800415	-1.573186707	14.70894092	-3.999511475	-2.280133179	0.714498779	-3.058955811	31.36943799		4.573718872	-1.231361938	40.04913086	-2.863554382	-4.990618408	19.46699512
																			364	-2.068477173	-1.976527954	15.07541357	-3.76142749	-3.25184314	0.228170776	-3.459606323	39.90399634		4.585273071	-1.097422302	39.81698047	-3.046470947	-5.105428467	19.16644727
																			365	-2.095153809	-2.583869141	15.94588672	-3.515343384	-2.796146851	0.501842529	-3.461256836	35.67854712		4.640826904	-1.264982666	38.66283398	-2.453387695	-5.062238525	19.08189941
																			366	-1.753830566	-3.043210327	17.64435938	-3.765259399	-1.979731934	0.873514526	-3.548532349	27.19710559		5.088380859	-1.536792908	37.60668555	-1.146304321	-5.473048828	18.81335107
																			367	-1.524507263	-3.058551514	18.17883203	-3.439175415	-1.794379395	0.531186401	-3.679682983	18.57966394		4.931935059	-1.42360321	37.52053516	0.068778931	-5.817858887	18.58480273
																			368	-1.08718396	-2.6978927	17.49130518	-2.961091187	-1.725964355	0.002858521	-3.444833252	10.10622241		4.863489258	-1.463663574	36.69638867	0.541862305	-6.054669189	18.59625488
																			369	-0.87386084	-2.013233948	16.64177734	-2.603007202	-1.644455566	0.048530396	-3.421983887	-3.527223022		4.855043213	-1.870723877	35.71024023	0.144945435	-6.581479248	18.95170654
																			370	-0.852537354	-1.384575195	15.49825	-2.356923157	-1.268009277	1.778202393	-4.085259277	-26.57666846		4.630597168	-2.45403418	34.52008984	-0.553971191	-6.620289307	19.3711582
																			371	-0.799214172	-1.175916382	14.61072266	-2.126838989	-1.179500488	3.413874268	-4.787159912	-45.16210999		4.966151367	-2.514094482	32.79794141	-1.588887878	-5.961099365	20.38260938
																			372	-0.985890869	-1.855257446	14.25319531	-2.152755005	-1.443116699	3.317546265	-5.294435547	-51.80355542		5.201705566	-1.918904755	31.94779395	-2.297804443	-5.411909668	21.25806152
																			373	-1.236567627	-2.638598755	13.83566846	-2.826670959	-1.75073291	3.217218262	-5.239960938	-56.36500085		5.325259521	-1.577715118	30.91164453	-2.144721252	-5.270719727	20.98151367
																			374	-1.679244385	-2.877939941	13.23014063	-2.940586792	-2.227067993	4.044890137	-4.739736572	-63.09444238		5.272813477	-1.425275391	29.31549609	-1.487637939	-5.079530029	20.48096582
																			375	-2.153921082	-3.409281006	12.85461328	-2.414502808	-2.519277954	4.290562134	-4.603761963	-65.72788794		4.744367676	-1.196835785	27.95934766	-0.970554565	-4.914340088	20.28441797
																			376	-2.356597778	-3.332622314	12.99108643	-2.048418762	-2.807331543	3.552234131	-4.860912598	-66.96132935		5.083921875	-1.542146057	26.15119922	-1.065471252	-5.033150146	20.03186914
																			377	-2.271274475	-2.387963501	13.64955908	-1.746334595	-3.030791504	2.875906128	-5.437938232	-66.0347749		5.69947583	-1.804706421	24.09305078	-0.610387939	-5.125960205	20.21132129
																			378	-2.073951172	-1.855304688	14.37803125	-1.580250595	-3.177063965	3.219578125	-5.758463867	-52.24421643		5.691029785	-1.807516693	22.62090137	1.176695313	-5.234770508	21.16677246
																			379	-2.05262793	-1.622645935	14.90450391	-1.886166565	-3.050492676	4.755249878	-5.700239258	-37.14966187		5.822583984	-2.552577087	21.39475293	1.881778687	-5.665580811	21.92222461
																			380	-2.159304626	-1.633987183	15.00897705	-2.008082397	-2.427640259	5.566921753	-5.700014648	-24.81510327		5.802138184	-2.994137329	20.20260547	0.414862061	-5.962390869	21.79767676
																			381	-2.233981323	-2.233328308	14.3734502	-1.761998413	-1.871693848	5.288593872	-5.790540283	-7.728548828		5.281692139	-2.859447632	19.20245605	-1.028054688	-5.989200928	21.77712793
																			382	-1.87665802	-2.688669556	12.92392236	-1.875914368	-0.673435059	5.568265869	-5.861440918	3.070009766		5.225245972	-2.647757874	18.19230859	-1.808971436	-5.968011108	21.97258008
																			383	-1.695334839	-2.748010742	11.72039502	-1.6618302	0.22854248	5.827937744	-5.778091309	2.860560303		5.480800171	-2.518818237	17.55015918	-1.749888062	-5.768821167	22.11203223
																			384	-1.578011566	-2.519351807	11.46086768	-1.071746185	-0.22641748	5.781609619	-5.934116943	-1.148881348		5.332354126	-2.50287854	16.93601074	-1.02880481	-5.35763147	22.65948438
																			385	-0.740688293	-1.698693176	11.48734082	-0.82566214	-0.188283691	4.805281494	-5.81639209	-2.294322754		5.355908325	-2.105688965	16.12986279	-0.679721436	-4.948441528	23.16693555
																			386	-0.70336499	-1.350034302	11.28181299	-0.683578064	0.156256348	3.904953613	-5.360292969	-2.447768311		5.619462402	-1.750499207	15.80171387	-0.330638184	-4.911251831	23.0423877
																			387	-0.970041748	-1.633375488	10.72228613	-0.885494034	0.287233887	4.714625488	-5.306318359	-9.713209717		5.683016357	-1.61955957	15.34756543	0.14844519	-5.10006189	22.23783887
																			388	-0.484718384	-2.096716797	10.1287583	-1.191409889	0.920398895	4.966297607	-5.24359375	-25.78665527		5.734570801	-1.420619843	15.04541699	-0.058471436	-5.148871948	22.01729102
																			389	-0.959395142	-3.188057983	9.487231445	-0.953325867	1.055688965	4.999969238	-4.867744385	-39.0360968		6.190124512	-1.423430176	15.86326855	-0.665388245	-4.997682251	22.26874316
																			390	-2.170071899	-3.903399048	8.583704102	-0.547241776	0.466697754	5.327641113	-4.667019897	-50.54954224		6.453678467	-1.342490479	16.83711963	-1.416304993	-4.63849231	21.96819434
																			391	-2.708748535	-4.074740356	7.852176758	-0.42115773	-0.178949768	4.909313354	-4.56604541	-67.48698755		6.221232666	-0.854550781	17.28897168	-2.483221619	-4.307302368	21.99564648
																			392	-2.511425415	-4.182081421	7.830649658	-0.255073669	-0.708722168	5.138985107	-4.322821045	-76.3604292		6.408786621	-0.862361084	17.37082227	-3.348138489	-4.288112671	21.99909863
																			393	-2.010102112	-3.557422607	8.05112207	0.407010361	-0.769807129	4.794657349	-4.028596558	-77.32987073		6.66434082	-0.994671417	17.2366748	-3.797055176	-4.230922729	21.41055078
																			394	-1.796778809	-2.644763794	8.831594727	0.653094498	-0.054267151	3.680329102	-3.88174707	-79.56332007		6.591894775	-1.08873175	17.02452637	-3.72397168	-3.745732788	20.99000195
																			395	-1.599455505	-2.404105103	10.03006787	0.26717852	1.281866669	3.706001099	-4.092522583	-76.51676172		6.831448975	-1.791292084	16.65637695	-3.432888428	-3.268543152	20.8974541
																			396	-1.658132202	-2.975446289	10.32654004	0.409262573	1.815437866	2.927673096	-3.952048096	-64.92620313		7.343003174	-2.317102356	17.02422949	-3.925805054	-3.08535321	21.39690625
																			397	-1.68480896	-4.210787598	9.567013184	0.735346649	1.644759155	1.923344971	-3.56207373	-52.76764868		7.886557129	-2.735662598	17.61208008	-5.23872168	-3.194163513	22.28035742
																			398	-1.823485596	-5.098128906	8.473485596	0.861430725	1.746892944	2.559016968	-3.715349243	-37.72909399		7.890111084	-2.9382229	17.33593213	-6.001638428	-3.012973572	23.09180957
																			399	-2.538162354	-5.169469971	8.453958496	0.491514801	1.790682922	2.646688965	-3.753749756	-20.88253564		7.605665527	-2.502783386	17.00978271	-6.666555176	-2.591783691	23.36726074
[truncated: 4 more columns]
