# Supplementary material for: Revisiting the role of Dcc in visual system development with a novel eye clearing method
Source: eLife. 2020 Feb 25;9:e51275. doi: 10.7554/eLife.51275 (PMC7062470; doi:10.7554/eLife.51275)
Supplement: Supplementary file 2. [file elife-51275-supp2.xlsx]

## Sheet: Validated antibodies
Name	Catalog #	company	type	dilution	Species tested	Stage	link
Calretinin	MAB1568 (clone 6B8.2)	Merck	mouse IgG	1:1000	mouse	Adult	-
Collagen IV	134001	Bio-Rad	goat polyclonal	1:400	human, mouse	GW11, GW14, P0, P15, P30, Adult	-
Arrestin-C	AB15282	Merck	Rabbit polyclonal	1:1000	mouse	P30	see Figure 7-video supplement 2
DCC (A20)	sc-6535	Santa Cruz Biotechnologies	Goat IgG	1:500	human, mouse	GW7.5, GW11, GW14, E11	see Figure 1C,D
Dsred	632496	Clontech	Rabbit polyclonal	1:300	mouse	E9, E10, E13, E15	see Figure 2B,C
Iba-1	AB5076	abcam	Goat polyclonal	1:300	mouse	Adult	-
Islet1	Ab20670	abcam	Rabbit polyclonal	1:300	mouse	E11, E12	see Figure 1C,D; Figure 3D,E,G,H
OPN1MW	AB5405	Merck	Rabbit polyclonal	1:300	mouse	Adult	-
OPN1sw (N20)	sc-14363	santa cruz	Goat polyclonal IgG	1:1000	mouse	P30	see Figure 7O,P; Figure 7-video supplement 2
Pax2	AF3364	R&D systems	Goat polyclonal	1:300	mouse	E9, E10, E11	see Figure 2B,C
Pax6	AB2237	Merck	Rabbit IgG	1:300	mouse	E9, E10	-
PKCalpha	P4334	SIGMA	Rabbit polyclonal	1:300	mouse	Adult	-
PLVAP (meca32)	ab81719	Abcam	Mouse monoclonal	1:300	human	GW11, GW14	-
Rbpms	1830-RBPMS	Phosphosolutions	Rabbit polyclonal	1:500	human, mouse	GW11, P0, P15, P30, Adult	see Figure 5-figure supplement 1G,H,I,J
Sox2	ab97959	abcam	Rabbit polyclonal	1:300	mouse	E12	-
ßgal	#55976	CAPPEL	Rabbit IgG	1:300	mouse	E11	-
Tag1	AF4439	R&D systems	Goat polyclonal	1:500	mouse	E12, E15, E16	see Figure 3C,F,G,H; Figure 4C,D,E,F,G; Figure 4-video supplement 1
Robo3	AF3076	R&D systems	Goat IgG	1:500	mouse	E16, P0, P7	-
GFAP (bovine)	Z033429	DAKO	Rabbit polycolnal	1:300	mouse	P0, P15	-
Chat	AB144P	Merck	Goat polyclonal	1:500	human	GW6.5, GW10.5	-
Myosin Heavy Chain (clone A4.1025)	05-716	Merck	Mouse monoclonal IgG	1:250	human	GW6.5, GW10.5	-
Pax7	PA1-117	Thermofisher	Rabbit polyclonal	1:500	human	GW6.5, GW10.5	-
Smooth Muscle Actin	A2547	Sigma	Mouse monoclonal	1:1000	human	GW11	-

## Sheet: antibodies not validated 
Name	Catalog #	company	type	dilution	Species	Stage	link
RPE-65	MAB5428	Millipore	Mouse igG1	1:500	mouse	Adult	-
